# Supplementary material for: Synthesis of chiral pyrimidine-substituted diester D–A cyclopropanes via asymmetric cyclopropanation of phenyliodonium ylides
Source: Royal Society of Chemistry journal article supplement (doi:10.1039/d0cc04536e), 2020-01-01
Supplement: d0cc04536e1.pdf [file d0cc04536e1.pdf]

## Supporting Information:

# Synthesis of chiral pyrimidine-substituted diester D-A cyclopropanes via asymmetric cyclopropanation of phenyliodonium ylides

Hai-Xia Wang, Wen-Peng Li, Mi-Mi Zhang, Ming-Sheng Xie\*, Gui-Rong Qu, Hai-Ming Guo\*

Henan Key Laboratory of Organic Functional Molecules and Drug Innovation, Collaborative Innovation Center of Henan Province for Green Manufacturing of Fine Chemicals, Key Laboratory of Green Chemical Media and Reactions, Ministry of Education, School of Chemistry and Chemical Engineering, Henan Normal University, Xinxiang, Henan 453007, China.

E-mail: xiemingsheng@htu.edu.cn; ghm@htu.edu.cn

## Contents

|                                                                                 |     |
|---------------------------------------------------------------------------------|-----|
| 1. General information .....                                                    | S2  |
| 2. Synthesis of starting materials.....                                         | S3  |
| 3. General procedure for the enantioselective cyclopropanation .....            | S3  |
| 4. Asymmetric cyclopropanation of N1-allylthymines .....                        | S3  |
| 5. Gram-scale synthesis of <b>3aa</b> .....                                     | S3  |
| 6. Transformation of the chiral cyclopropanes.....                              | S4  |
| 7 Condition optimization.....                                                   | S7  |
| 8. The X-ray data for <b>3ba</b> .....                                          | S8  |
| 9. The analytical and spectral characterization data for the cycloadducts ..... | S9  |
| 10. References .....                                                            | S20 |
| 11. Copies of <sup>1</sup> H and <sup>13</sup> C NMR spectra.....               | S21 |
| 12. Copies of HPLC spectra for racemic and chiral compounds .....               | S49 |

## 1. General information

All reactions were carried out in oven-dried Schlenk tube filled nitrogen, and monitored by thin layer chromatography (TLC). All reagents were reagent grade quality and purchased from commercial sources unless otherwise indicated. Molecular sieves powder 3Å MS, 4Å MS, and 5Å MS were dried at 500 °C for 4 h in vacuum before use. <sup>1</sup>H NMR spectra were recorded on commercial instruments (400/600 MHz). Data are reported as follows: chemical shift, multiplicity (s = singlet, d = doublet, t = triplet, q = quaternary, m = multiplet, br = broad), coupling constants (Hz), integration. <sup>13</sup>C NMR data were collected on commercial instruments (100/150 MHz) with complete proton decoupling. Chemical shifts are reported in ppm from the tetramethylsilane with the solvent resonance as internal standard. Coupling constants (*J*) are reported in Hz. Enantiomer excesses were determined by chiral HPLC analysis on Chiralcel IA/ID in comparison with the authentic racemates. Chiral HPLC analysis recorded on Thermo scientific Dionex Ultimate 3000. Optical rotations were reported as follows:  $[\alpha]_D^{25}$  (c: = g/100mL, in solvent). Optical rotations recorded on Autopol Automatic Polarimeter. All products were further characterized by high-resolution mass spectra (HRMS). The HRMS was obtained using a Q-TOF instrument equipped with an ESI source. The ligands **L1-L8** were purchased from commercial suppliers and used without further purifications.

## 2. Synthesis of starting materials

N1-vinylthymine (**1a-1n**) were prepared according to the literature procedures.<sup>1</sup> N1-vinylthymine were purified by flash chromatography on silica gel using petroleum ether/ethyl acetate as an eluant.

Phenyliodonium ylides were prepared according to the literature precedents.<sup>2</sup>

## 3. General procedure for the enantioselective cyclopropanation

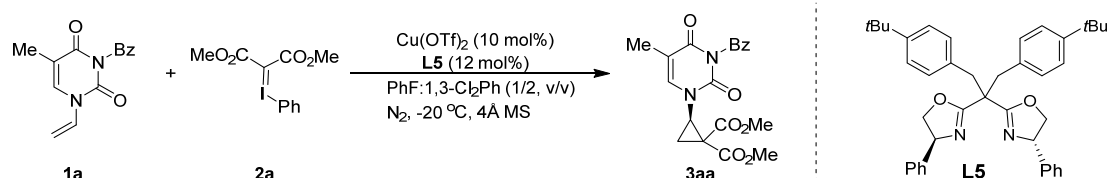

A mixture of  $\text{Cu}(\text{OTf})_2$  (0.005 mmol, 0.1 equiv) and the ligand **L5** (0.006 mmol, 0.12 equiv) in PhF:1,3- $\text{Cl}_2\text{Ph}$  (1/2, v/v, 0.5 mL) with activated 4Å MS was stirred at room temperature for 2 h under an atmosphere of nitrogen. Then, N1-vinylthymine **1a** (0.05 mmol) was added to the mixture under an atmosphere. The mixture was then cooled to  $-20^\circ\text{C}$  for 20 minutes and then phenyliodonium ylide **2a** (0.20 mmol) was added to the mixture under an atmosphere of nitrogen in one portion. After the reaction was complete (monitoring by TLC), the reaction was filtered through a glass funnel with a thin layer of silica gel with DCM (approx 15 mL). The filtrate was concentrated under reduced pressure. The residue was purified by flash chromatography (petroleum ether/ethyl acetate = 2:1) to afford the product **3aa**.

## 4. Asymmetric cyclopropanation of N1-allylthymines

### Scheme S1

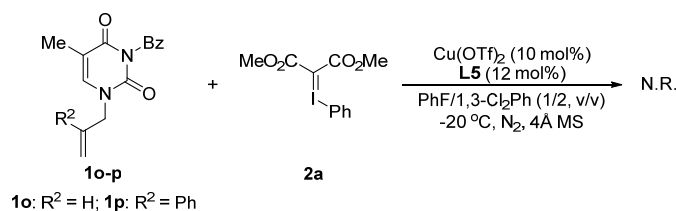

## 5. Gram-scale synthesis of 3aa

### Scheme S2

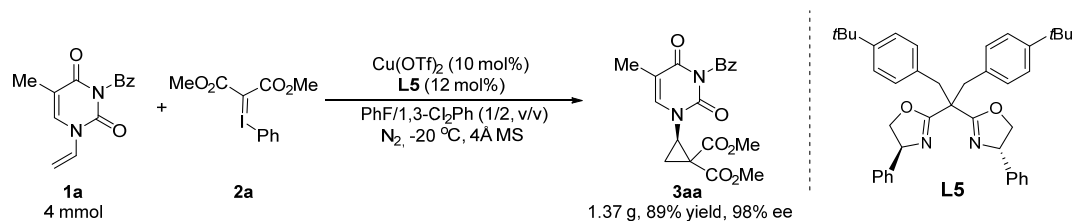

A mixture of  $\text{Cu}(\text{OTf})_2$  (0.4 mmol, 14.4 mg, 0.1 equiv) and ligand **L5** (0.48 mmol, 28.8 mg, 0.12 equiv) in PhF:1,3- $\text{Cl}_2\text{Ph}$  (1/2, v/v, 40 mL) with activated 4Å MS was stirred at room temperature for 2

h under an atmosphere of nitrogen. Then, N1-vinylthymine **1a** (4 mmol, 1.024 g) was added to the mixture under an atmosphere of nitrogen. The mixture was then cooled to -20 °C for 20 minutes and phenyliodonium ylide **2a** (24 mmol, 8.016 g) was added to the mixture under an atmosphere of nitrogen in one portion. After the reaction was complete (monitoring by TLC), the reaction was filtered through a glass funnel with a thin layer of silica gel with DCM (approx 100 mL). The filtrate was concentrated under reduced pressure. The residue was purified by flash chromatography (petroleum ether/ethyl acetate = 2:1) to afford the product **3aa** (1.371 g, 89% yield, 98% ee).

## 6. Transformation of the chiral cyclopropanes

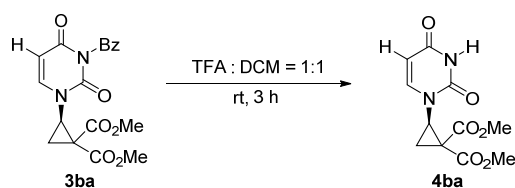

In a test tube, cyclopropane **3ba** (37.2 mg, 0.1 mmol) was dissolved in a mixture of TFA/DCM (1:1, v/v, 1.0 mL) and the resulting solution was stirred at room temperature for 3 h. The progress of the reaction was monitored by TLC. Then, sat. NaHCO<sub>3</sub> was added and the mixture was extracted with DCM (3 x 10 mL). The combined organic phase was dried over anhydrous Na<sub>2</sub>SO<sub>4</sub>. The solvent was removed and purified by column chromatography on silica gel (dichloromethane: methanol = 15:1) to afford the product **4ba** (81% yield, 84% ee).

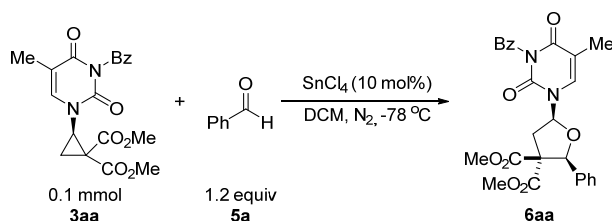

In a test tube, cyclopropane **3aa** (0.1 mmol) and benzaldehyde **5a** (0.12 mmol, 1.2 equiv) were dissolved in DCM (1 mL) at -78 °C under an atmosphere of nitrogen. The progress of the reaction was monitored by TLC. After overnight, water (2 mL) was added and the mixture was extracted with DCM (5 mL x 3). The organic phases were combined, dried over Na<sub>2</sub>SO<sub>4</sub> and concentrated under vacuum. The residue was purified by silica gel flash chromatography (petroleum : ethyl acetate = 2:1) to give the desired product **6aa** (68% yield, >20:1 dr, and 50% ee).

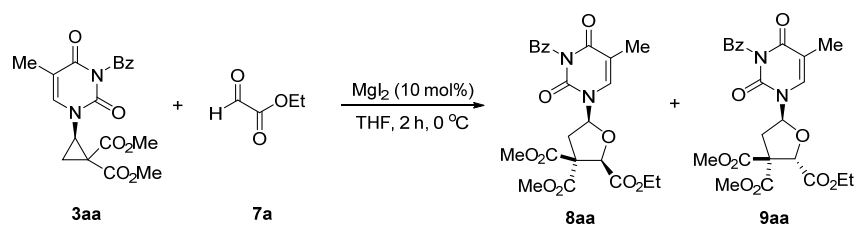

In a test tube, cyclopropane **3aa** (37.2 mg, 0.1 mmol) and ethyl glyoxalate **7a** (approximately 50% solvent in toluene, 0.12 mmol, 23.8  $\mu$ L) were dissolved in THF (0.5 mL).  $MgI_2$  (2.8 mg, 0.01 mmol) was dissolved in THF (0.5 mL) and added to the above tube via syringe at 0 °C for 2 h under an atmosphere of nitrogen. The progress of the reaction was monitored by TLC. Then, water (2 mL) was added and the mixture was extracted with DCM (5 mL x 3). The organic phases were combined, dried over  $Na_2SO_4$  and concentrated under vacuum. The residue was purified by silica gel flash chromatography (petroleum : ethyl acetate = 1:1) to give the desired products **8aa** (35% yield, 86% ee) and **9aa** (37% yield, 94% ee).

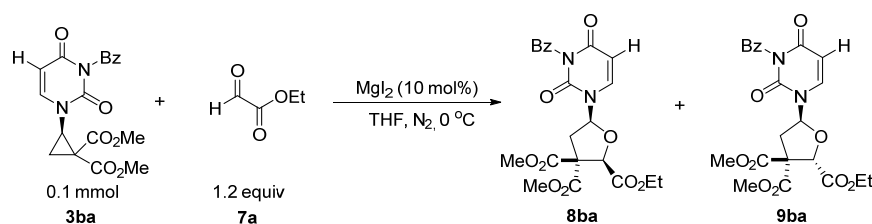

In a test tube, cyclopropane **3ba** (37.2 mg, 0.1 mmol) and ethyl glyoxalate **7a** (approximately 50% solvent in toluene, 0.12 mmol, 23.8  $\mu$ L) were dissolved in THF (0.5 mL).  $MgI_2$  (2.8 mg, 0.01 mmol) was dissolved in THF (0.5 mL) and added to the above tube via syringe at 0 °C for 2 h under an atmosphere of nitrogen. The progress of the reaction was monitored by TLC. Then, water (2 mL) was added and the mixture was extracted with DCM (5 mL x 3). The organic phases were combined, dried over  $Na_2SO_4$  and concentrated under vacuum. The residue was purified by silica gel flash chromatography (petroleum : ethyl acetate = 1:1) to give the desired products **8ba** (47% yield, 80% ee), **9ba** (24% yield, 88% ee).

**Table S1<sup>a</sup>**

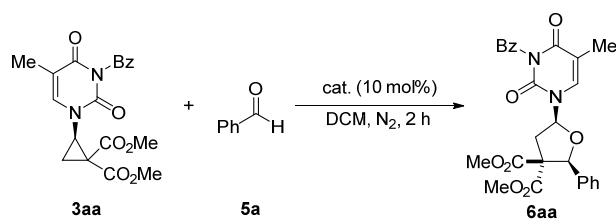

| entry            | cat.        | T (°C) | ee <sup>b</sup> (%) |
|------------------|-------------|--------|---------------------|
| 1                | $In(OTf)_3$ | 0      | 24                  |
| 2 <sup>c</sup>   | $In(OTf)_3$ | -20    | -                   |
| 3                | $Sn(OTf)_2$ | 0      | 24                  |
| 4 <sup>c</sup>   | $Sn(OTf)_2$ | -20    | -                   |
| 5                | $SnCl_4$    | -20    | 12                  |
| 6                | $SnCl_4$    | -40    | 42                  |
| 7 <sup>c,d</sup> | $MgI_2$     | 0      | -                   |

|                  |                  |    |   |
|------------------|------------------|----|---|
| 8 <sup>c,d</sup> | MgI <sub>2</sub> | rt | - |
| 9 <sup>c,d</sup> | MgI <sub>2</sub> | 65 | - |

<sup>a</sup> Reaction conditions: cat. (10 mol%), **3aa** (0.1 mmol), **5a** (0.12 mmol), DCM (1 mL) under N<sub>2</sub> atmosphere. <sup>b</sup> ee value of the product was determined by chiral HPLC. <sup>c</sup> No reaction. <sup>d</sup> THF was used as the solvent.

In a test tube, cyclopropane **3aa** (38.6 mg, 0.1 mmol), benzaldehyde **5a** (0.12 mmol, 1.2 equiv) and catalyst (10 mol%) were added in DCM (1 mL) under an atmosphere of nitrogen. The progress of the reaction was monitored by TLC. After overnight, water (2 mL) was added and the mixture was extracted with DCM (5 mL x 3). The organic phases were combined, dried over Na<sub>2</sub>SO<sub>4</sub> and concentrated under vacuum. The residue was purified by silica gel flash chromatography (petroleum: ethyl acetate = 2:1) to give the desired product **6aa**.

**Table S2<sup>a</sup>**

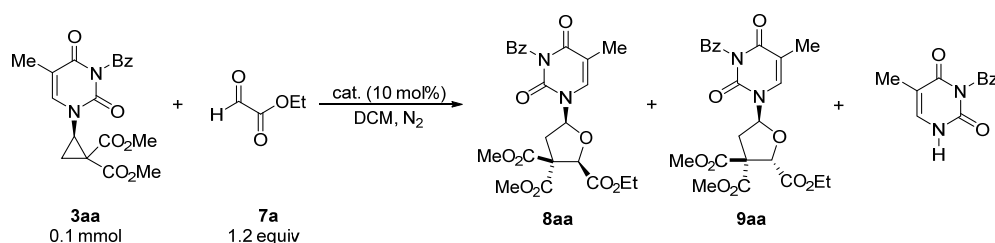

| entry            | cat.                 | T (°C) | ee <sup>b</sup> ( <b>8aa</b> ) (%) | ee <sup>b</sup> ( <b>9aa</b> ) (%) |
|------------------|----------------------|--------|------------------------------------|------------------------------------|
| 1                | SnCl <sub>2</sub>    | rt     | 11                                 | 9                                  |
| 2                | ZnBr <sub>2</sub>    | rt     | 33                                 | 51                                 |
| 3 <sup>c</sup>   | AlCl <sub>3</sub>    | rt     | -                                  | -                                  |
| 4 <sup>c,d</sup> | Yb(OTf) <sub>3</sub> | rt     | -                                  | -                                  |
| 5 <sup>e</sup>   | Mg(OTf) <sub>2</sub> | rt     | -                                  | -                                  |
| 6                | Zn(NTf) <sub>2</sub> | rt     | 10                                 | 23                                 |
| 7 <sup>f</sup>   | SnCl <sub>4</sub>    | -78    | -                                  | -                                  |
| 8 <sup>f</sup>   | SnCl <sub>4</sub>    | -20    | -                                  | -                                  |
| 9 <sup>g</sup>   | SnCl <sub>4</sub>    | rt     | 14                                 | -                                  |

<sup>a</sup> Reaction conditions: cat. (10 mol%), **3aa** (0.1 mmol), **7a** (0.12 mmol), DCM (1 mL) under N<sub>2</sub> atmosphere. <sup>b</sup> ee value of the product was determined by chiral HPLC. <sup>c</sup> Trace of products (**8aa** and **9aa**) was detected. <sup>d</sup> Some of Bz-protected thymine was detected. <sup>e</sup> No reaction. <sup>f</sup> Trace of product **8aa** was detected and the product **9aa** was not detected. <sup>g</sup> Product **9aa** was not detected.

In a test tube, cyclopropane **3aa** (38.6 mg, 0.1 mmol), ethyl glyoxalate **7a** (approximately 50% solvent in toluene, 0.12 mmol, 23.8 μL) were dissolved in DCM (1 mL) at room temperature under an atmosphere of nitrogen. The progress of the reaction was monitored by TLC. After overnight, water (2 mL) was added and the mixture was extracted with DCM (5 mL x 3). The organic phases were

combined, dried over Na<sub>2</sub>SO<sub>4</sub> and concentrated under vacuum. The residue was purified by silica gel flash chromatography (petroleum: ethyl acetate = 1:1) to give the corresponding products **8aa** and **9aa**.

## 7. Condition optimization

Table S3<sup>a</sup>

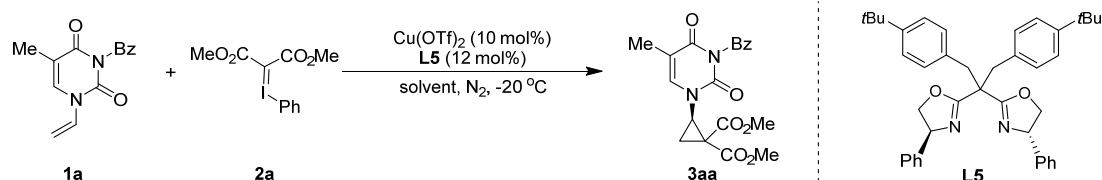

| entry | solvent           | additive      | t (h) | yield <sup>b</sup> (%) | ee <sup>c</sup> (%) |
|-------|-------------------|---------------|-------|------------------------|---------------------|
| 1     | THF               |               | 48    | 39                     | 92                  |
| 2     | DCE               |               | 48    | 56                     | 70                  |
| 3     | CHCl <sub>3</sub> |               | 48    | 47                     | 84                  |
| 4     | MeCN              |               | 48    | 32                     | 44                  |
| 5     | toluene           |               | 48    | 52                     | 93                  |
| 6     | toluene           | 3Å MS (50 mg) | 72    | 73                     | 93                  |
| 7     | toluene           | 4Å MS (50 mg) | 72    | 94                     | 93                  |
| 8     | toluene           | 5Å MS (50 mg) | 72    | 85                     | 93                  |

<sup>a</sup>Unless otherwise noted, reaction conditions were: **1a** (0.05 mmol), **2a** (2.0 mmol), solvent (0.5 mL), Cu(OTf)<sub>2</sub> (10 mol%), **L5** (12 mol%), N<sub>2</sub> atmosphere. <sup>b</sup>Isolated yields were reported. <sup>c</sup>Determined by chiral HPLC.

Table S4<sup>a</sup>

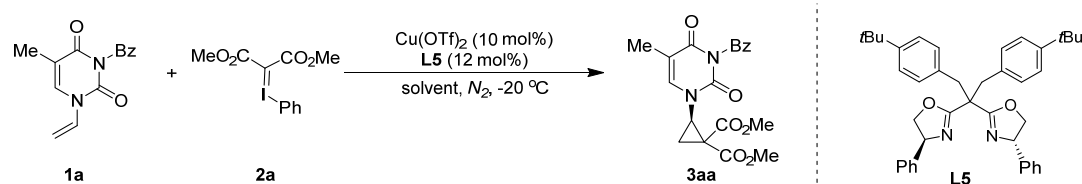

| entry | solvent                               | yield <sup>b</sup> (%) | ee <sup>c</sup> (%) |
|-------|---------------------------------------|------------------------|---------------------|
| 1     | xylene                                | 49                     | 90                  |
| 2     | mesitylene                            | 43                     | 92                  |
| 3     | PhCl                                  | 56                     | 90                  |
| 4     | 1,3-Cl <sub>2</sub> Ph                | 86                     | 98                  |
| 5     | PhF                                   | 97                     | 97                  |
| 6     | PhCF <sub>3</sub>                     | 96                     | 97                  |
| 7     | PhF/1,3-Cl <sub>2</sub> Ph (1/1, v/v) | 96                     | 99                  |
| 8     | PhF/1,3-Cl <sub>2</sub> Ph (2/1, v/v) | 94                     | 98                  |

<sup>a</sup>Unless otherwise noted, reaction conditions were: **1a** (0.05 mmol), **2a** (2.0 mmol), solvent (0.5 mL), Cu(OTf)<sub>2</sub> (10 mol%), **L5** (12 mol%), 4Å MS (50 mg) was used under N<sub>2</sub> for 72 h. <sup>b</sup>Isolated yields were reported. <sup>c</sup>Determined by chiral HPLC.

## 8. The X-ray data for 3ba

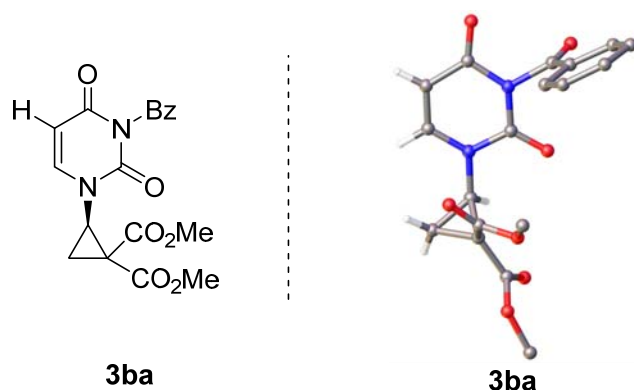

The product of **3ba** was recrystallized by dichloromethane/ ethyl acetate (1/1).

CCDC 2009735 (**3ba**) contains the supplementary crystallographic data for this paper. These data can be obtained free of charge from The Cambridge Crystallographic Data Centre via [www.ccdc.cam.ac.uk/data\\_request/cif](http://www.ccdc.cam.ac.uk/data_request/cif).

**Table 1 Crystal data and structure refinement for 3ba.**

|                                             |                                                               |
|---------------------------------------------|---------------------------------------------------------------|
| Identification code                         | lwp-20191021                                                  |
| Empirical formula                           | C <sub>18</sub> H <sub>16</sub> N <sub>2</sub> O <sub>7</sub> |
| Formula weight                              | 372.33                                                        |
| Temperature/K                               | 292.7(2)                                                      |
| Crystal system                              | orthorhombic                                                  |
| Space group                                 | P212121                                                       |
| a/Å                                         | 7.48180(10)                                                   |
| b/Å                                         | 10.0714(2)                                                    |
| c/Å                                         | 23.3470(3)                                                    |
| α/°                                         | 90                                                            |
| β/°                                         | 90                                                            |
| γ/°                                         | 90                                                            |
| Volume/Å <sup>3</sup>                       | 1759.25(5)                                                    |
| Z                                           | 4                                                             |
| ρ <sub>calc</sub> /cm <sup>3</sup>          | 1.406                                                         |
| μ/mm <sup>-1</sup>                          | 0.933                                                         |
| F(000)                                      | 776.0                                                         |
| Crystal size/mm <sup>3</sup>                | 0.23 × 0.1 × 0.07                                             |
| Radiation                                   | CuKα (λ = 1.54184)                                            |
| 2θ range for data collection/°              | 7.574 to 143.326                                              |
| Index ranges                                | -9 ≤ h ≤ 9, -12 ≤ k ≤ 12, -28 ≤ l ≤ 28                        |
| Reflections collected                       | 31254                                                         |
| Independent reflections                     | 3434 [R <sub>int</sub> = 0.0352, R <sub>sigma</sub> = 0.0153] |
| Data/restraints/parameters                  | 3434/0/246                                                    |
| Goodness-of-fit on F <sup>2</sup>           | 1.037                                                         |
| Final R indexes [I ≥ 2σ (I)]                | R1 = 0.0398, wR2 = 0.1032                                     |
| Final R indexes [all data]                  | R1 = 0.0416, wR2 = 0.1052                                     |
| Largest diff. peak/hole / e Å <sup>-3</sup> | 0.13/-0.21                                                    |
| Flack parameter                             | -0.05(7)                                                      |



## 9. The analytical and spectral characterization data for the cycloadducts

### (R)-Dimethyl -2-(3-benzoyl-5-methyl-2,4-dioxo-3,4-dihydropyrimidin-1(2H)-yl) cyclopropane-1,1-dicarboxylate (3aa)

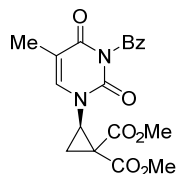

White solid; m.p.: 181.1 – 183.6 °C. 97% yield, 18.7 mg, 99% ee.  $[\alpha]_D^{25} = -20.7$  (c = 1.4, CH<sub>2</sub>Cl<sub>2</sub>).

**HPLC** CHIRALCEL IA, *n*-hexane/2-propanol = 70/30, flow rate = 0.8 mL/min,  $\lambda = 254$  nm, retention time: 13.750 min, 15.275 min.

**<sup>1</sup>H NMR** (400 MHz, Methanol-*d*<sub>4</sub>)  $\delta$  7.91 (d, *J* = 7.6 Hz, 2H), 7.72 (t, *J* = 6.8 Hz, 1H), 7.56 (t, *J* = 7.6 Hz, 3H), 4.01 (t, *J* = 7.6 Hz, 1H), 3.74 (s, 3H), 3.62 (s, 3H), 2.32 (t, *J* = 6.4 Hz, 1H), 2.01 (t, *J* = 7.6 Hz, 1H), 1.92 (s, 3H).

**<sup>13</sup>C NMR** (150 MHz, Chloroform-*d*)  $\delta$  168.4, 167.6, 166.9, 162.8, 150.2, 139.0, 135.2, 131.6, 130.7, 129.2, 111.1, 53.4, 53.4, 42.8, 35.0, 20.4, 12.7.

**HRMS (ESI)**: *m/z* calcd. for : C<sub>19</sub>H<sub>18</sub>N<sub>2</sub>O<sub>7</sub>Na<sup>+</sup> [M+Na]<sup>+</sup> : 409.1006, found 409.1006.

### (R)-Dimethyl-2-(3-benzoyl-2,4-dioxo-3,4-dihydropyrimidin-1(2H)-yl) cyclopropane-1,1-dicarboxylate (3ba)

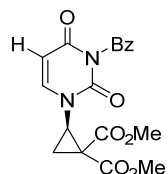

White solid; m.p.: 174.1 – 179.6 °C. 95% yield, 17.5 mg, 97% ee.  $[\alpha]_D^{25} = -80.7$  (c = 1.2, CH<sub>2</sub>Cl<sub>2</sub>).

**HPLC** CHIRALCEL IA, *n*-hexane/2-propanol = 50/50, flow rate = 0.9 mL/min,  $\lambda = 254$  nm, retention time: 23.415 min, 37.742 min.

**<sup>1</sup>H NMR** (600 MHz, Chloroform-*d*)  $\delta$  7.92 (d, *J* = 7.8 Hz, 2H), 7.65 (t, *J* = 6.6 Hz, 1H), 7.50 (t, *J* = 7.2 Hz, 2H), 7.27 (s, 1H), 5.83 (d, *J* = 7.8 Hz, 1H), 4.02 (t, *J* = 7.2 Hz, 1H), 3.78 (s, 3H), 3.68 (s, 3H), 2.22 (d, *J* = 6.6 Hz, 1H), 2.01 (t, *J* = 6.6 Hz, 1H).

**<sup>13</sup>C NMR** (150 MHz, Chloroform-*d*)  $\delta$  168.2, 167.5, 166.8, 162.0, 150.1, 143.1, 135.3, 131.4, 130.7, 129.2, 102.5, 53.4, 53.4, 43.0, 34.8, 20.2.

**HRMS (ESI)**: *m/z* calcd. for : C<sub>18</sub>H<sub>16</sub>N<sub>2</sub>O<sub>7</sub>Na<sup>+</sup> [M+Na]<sup>+</sup>: 395.0850, found 395.0849.

**(R)-Dimethyl -2-(3-benzoyl-5-fluoro-2,4-dioxo-3,4-dihydropyrimidin-1(2H)-yl) cyclopropane-1,1-dicarboxylate (3ca)**

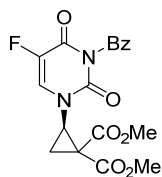

Colorless oil; 96% yield, 18.7 mg, 98% ee.  $[\alpha]_D^{25} = -44.2$  ( $c = 1.6$ ,  $\text{CH}_2\text{Cl}_2$ ).

**HPLC** CHIRALCEL IA, *n*-hexane/2-propanol = 70/30, flow rate = 0.8 mL/min,  $\lambda = 254$  nm, retention time: 14.867 min, 16.927 min.

**$^1\text{H}$  NMR** (600 MHz, Chloroform-*d*)  $\delta$  7.91 (d,  $J = 7.8$  Hz, 2H), 7.66 (t,  $J = 7.2$  Hz, 1H), 7.50 (t,  $J = 7.2$  Hz, 2H), 7.35 (d,  $J = 5.4$  Hz, 1H), 3.98 (t,  $J = 7.2$  Hz, 1H), 3.76 (s, 3H), 3.67 (s, 3H), 2.17 (t,  $J = 6.6$  Hz, 1H), 2.00 (t,  $J = 7.8$  Hz, 1H),

**$^{13}\text{C}$  NMR** (150 MHz, Chloroform-*d*)  $\delta$  167.2, 166.8, 166.7, 156.1(d,  $J_{\text{C-F}} = 114.0$  Hz), 148.8, 140.7, 139.1, 135.7, 130.9, 130.9, 129.3, 128.0 (d,  $J_{\text{C-F}} = 138.0$  Hz), 53.5, 53.4, 43.0, 34.9, 20.5.

**$^{19}\text{F}$  NMR** (376 MHz, Chloroform-*d*)  $\delta$  -163.85.

**HRMS (ESI)**:  $m/z$  calcd. for:  $\text{C}_{18}\text{H}_{15}\text{N}_2\text{O}_7\text{Na}^+ [\text{M}+\text{Na}]^+$ : 413.0756, found 413.0756.

**(R)-Dimethyl -2-(3-benzoyl-5-chloro-2,4-dioxo-3,4-dihydropyrimidin-1(2H)-yl) cyclopropane-1,1-dicarboxylate (3da)**

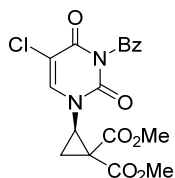

Colorless oil; 93% yield, 18.9 mg, 88% ee.  $[\alpha]_D^{25} = -32.6$  ( $c = 1.2$ ,  $\text{CH}_2\text{Cl}_2$ ).

**HPLC** CHIRALCEL IA, *n*-hexane/2-propanol = 70/30, flow rate = 0.8 mL/min,  $\lambda = 254$  nm, retention time: 14.640 min, 18.120 min.

**$^1\text{H}$  NMR** (600 MHz, Chloroform-*d*)  $\delta$  7.90 (d,  $J = 7.8$  Hz, 2H), 7.65 (t,  $J = 7.8$  Hz, 1H), 7.49 (t,  $J = 7.8$  Hz, 3H), 4.00 (t,  $J = 7.2$  Hz, 1H), 3.77 (s, 3H), 3.67 (s, 3H), 2.21 (t,  $J = 6.6$  Hz, 1H), 2.02 (t,  $J = 7.2$  Hz, 1H).

**$^{13}\text{C}$  NMR** (150 MHz, Chloroform-*d*)  $\delta$  167.2, 167.0, 166.8, 158.0, 149.3, 140.1, 135.6, 131.0, 130.9, 129.3, 109.2, 53.5, 53.5, 43.0, 34.8, 20.4.

**HRMS (ESI)**:  $m/z$  calcd. for:  $\text{C}_{18}\text{H}_{15}\text{N}_2\text{O}_7\text{Na}^+ [\text{M}+\text{Na}]^+$ : 429.0460, found 429.0458.

**(R)-Dimethyl-2-(3-benzoyl-5-bromo-2,4-dioxo-3,4-dihydropyrimidin-1(2H)-yl) cyclopropane-1,1-dicarboxylate (3ea)**

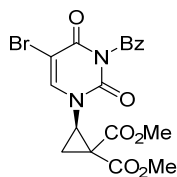

Colorless oil; 94% yield, 21.2 mg, 93% ee.  $[\alpha]_D^{25} = -43.7$  ( $c = 0.6$ ,  $\text{CH}_2\text{Cl}_2$ ).

**HPLC** CHIRALCEL IA, *n*-hexane/2-propanol = 70/30, flow rate = 0.8 mL/min,  $\lambda = 254$  nm, retention time: 15.412 min, 18.795 min.

**$^1\text{H}$  NMR** (600 MHz, Chloroform-*d*)  $\delta$  7.90 (d,  $J = 7.8$  Hz, 2H), 7.65 (t,  $J = 7.2$  Hz, 1H), 7.60 (s, 1H), 7.49 (t,  $J = 7.2$  Hz, 2H), 3.99 (d,  $J = 6.6$  Hz, 1H), 3.77 (s, 3H), 3.67 (s, 3H), 2.21 (t,  $J = 6.6$  Hz, 1H), 2.02 (t,  $J = 7.2$  Hz, 1H).

**$^{13}\text{C}$  NMR** (150 MHz, Chloroform-*d*)  $\delta$  167.2, 167.0, 166.7, 149.5, 142.5, 135.5, 131.0, 130.9, 129.3, 96.8, 53.5, 53.5, 43.0, 34.8, 20.5.

**HRMS (ESI)**:  $m/z$  calcd. for:  $\text{C}_{18}\text{H}_{15}\text{BrN}_2\text{O}_7\text{Na}^+ [\text{M}+\text{Na}]^+$ : 472.9955, found 472.9953

**(R)-Dimethyl-2-(3-benzoyl-5-iodo-2,4-dioxo-3,4-dihydropyrimidin-1(2H)-yl) cyclopropane-1,1-dicarboxylate (3fa)**

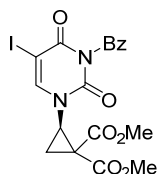

Colorless oil; 96% yield, 23.9 mg, 92% ee.  $[\alpha]_D^{25} = -81.8$  ( $c = 1.4$ ,  $\text{CH}_2\text{Cl}_2$ ).

**HPLC** CHIRALCEL IA, *n*-hexane/2-propanol = 70/30, flow rate = 0.8 mL/min,  $\lambda = 254$  nm, retention time: 14.430 min, 17.960 min.

**$^1\text{H}$  NMR** (400 MHz, Chloroform-*d*)  $\delta$  7.88 (dd,  $J = 1.2, 8.0$  Hz, 2H), 7.70 (s, 1H), 7.64 (t,  $J = 7.6$  Hz, 1H), 7.48 (t,  $J = 7.6$  Hz, 2H), 3.99 (dd,  $J = 8.0, 6.4$  Hz, 1H), 3.77 (s, 3H), 3.67 (s, 3H), 2.21 (t,  $J = 6.4$  Hz, 1H), 2.02 (dd,  $J = 8.0, 6.8$  Hz, 1H).

**$^{13}\text{C}$  NMR** (100 MHz, Chloroform-*d*)  $\delta$  167.3, 167.2, 166.7, 158.9, 149.8, 147.5, 135.5, 130.9, 130.8, 129.3, 68.0, 53.5, 53.5, 42.8, 34.7, 20.5.

**HRMS (ESI)**:  $m/z$  calcd. for:  $\text{C}_{18}\text{H}_{15}\text{N}_2\text{O}_7\text{Na}^+ [\text{M}+\text{Na}]^+$ : 520.9816, found 520.9816.

**(R)-Dimethyl-2-(3-benzoyl-2,4-dioxo-5-(trifluoromethyl)-3,4-dihydropyrimidin-1(2H)-yl) cyclopropane-1,1-dicarboxylate (3ga)**

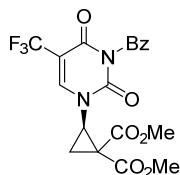

Colorless oil; 91% yield, 20.0 mg, 71% ee.  $[\alpha]_D^{25} = -26.4$  ( $c = 1.2$ ,  $\text{CH}_2\text{Cl}_2$ ).

**HPLC** CHIRALCEL IA, *n*-hexane/2-propanol = 70/30, flow rate = 0.8 mL/min,  $\lambda = 254$  nm, retention time: 9.917 min, 11.863 min.

**$^1\text{H}$  NMR** (600 MHz, Chloroform-*d*)  $\delta$  7.89 (d,  $J = 7.8$  Hz, 2H), 7.74 (s, 1H), 7.66 (t,  $J = 7.2$  Hz, 1H), 7.50 (t,  $J = 7.8$  Hz, 2H), 4.02 (t,  $J = 7.2$  Hz, 1H), 3.77 (s, 3H), 3.67 (s, 3H), 2.19 (t,  $J = 6.0$  Hz, 1H), 2.06 (t,  $J = 7.4$  Hz, 1H).

**$^{13}\text{C}$  NMR** (150 MHz, Chloroform-*d*)  $\delta$  167.0, 166.8, 157.4, 149.2, 144.2(q,  $J_{\text{C-F}} = 24.0$  Hz), 135.7, 130.9, 130.8, 129.4, 122.4, 120.6, 105.5(q,  $J_{\text{C-F}} = 132.0$  Hz), 53.5, 43.1, 34.6, 20.4.

**$^{19}\text{F}$  NMR** (376 MHz, Chloroform-*d*)  $\delta$  -63.28 (s)

**HRMS (ESI)**:  $m/z$  calcd. for:  $\text{C}_{19}\text{H}_{15}\text{F}_3\text{N}_2\text{O}_7\text{Na}^+ [\text{M}+\text{Na}]^+$ : 463.0724, found 463.0724.

**(R)-Dimethyl-2-(3-benzoyl-5-ethyl-2,4-dioxo-3,4-dihydropyrimidin-1(2H)-yl) cyclopropane-1,1-dicarboxylate (3ha)**

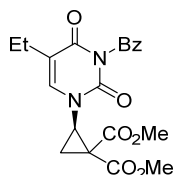

White solid; m.p.: 186.1 – 188.7°C. 96% yield, 19.2 mg, 93% ee.  $[\alpha]_D^{25} = -127.1$  ( $c = 0.8$ ,  $\text{CH}_2\text{Cl}_2$ ).

**HPLC** CHIRALCEL IA, *n*-hexane/2-propanol = 70/30, flow rate = 0.8 mL/min,  $\lambda = 254$  nm, retention time: 12.213 min, 13.250 min.

**$^1\text{H}$  NMR** (400 MHz, Chloroform-*d*)  $\delta$  7.90 – 7.87 (m, 2H), 7.62 (t,  $J = 7.2$  Hz, 1H), 7.47 (t,  $J = 7.6$  Hz, 2H), 7.01 (s, 1H), 3.98 (dd,  $J = 8.0, 6.4$  Hz, 1H), 3.76 (s, 3H), 3.65 (s, 3H), 2.43 – 2.35 (m, 2H), 2.24 (t,  $J = 6.4$  Hz, 1H), 1.98 (dd,  $J = 8.4, 6.4$  Hz, 1H), 1.16 (t,  $J = 7.2$  Hz, 3H).

**$^{13}\text{C}$  NMR** (100 MHz, Chloroform-*d*)  $\delta$  168.5, 167.6, 166.8, 150.1, 138.3, 135.1, 131.6, 130.65, 129.2, 116.8, 53.3, 42.9, 35.0, 20.5, 20.2, 12.7.

**HRMS (ESI)**:  $m/z$  calcd. for:  $\text{C}_{20}\text{H}_{20}\text{N}_2\text{O}_7\text{Na}^+ [\text{M}+\text{Na}]^+$ : 423.1163, found: 423.1163.

**(R)-Dimethyl-2-(3-benzoyl-5-methoxy-2,4-dioxo-3,4-dihydropyrimidin-1(2H)-yl) cyclopropane-1,1-dicarboxylate (3ia)**

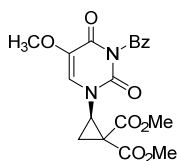

White solid; m.p.: 186.4 – 190.2 °C. 97% yield, 19.5 mg, 96% ee.  $[\alpha]_D^{25} = -25.0$  (c = 2.4, CH<sub>2</sub>Cl<sub>2</sub>).

**HPLC** CHIRALCEL IA, *n*-hexane/2-propanol = 70/30, flow rate = 0.8 mL/min,  $\lambda = 254$  nm, retention time: 22.702 min, 25.395 min.

**<sup>1</sup>H NMR** (400 MHz, Chloroform-*d*)  $\delta$  7.89 (d, *J* = 7.6 Hz, 2H), 7.63 (t, *J* = 6.8 Hz, 1H), 7.47 (t, *J* = 7.6 Hz, 2H), 6.79 (s, 1H), 3.97 (t, *J* = 6.8 Hz, 1H), 3.76 (d, *J* = 6.8 Hz, 6H), 3.65 (s, 3H), 2.24 (t, *J* = 6.4 Hz, 1H), 1.97 (t, *J* = 7.6 Hz, 1H).

**<sup>13</sup>C NMR** (100 MHz, Chloroform-*d*)  $\delta$  167.57, 167.55, 166.8, 158.5, 148.8, 136.3, 135.3, 131.3, 130.8, 129.2, 123.4, 58.1, 53.4, 53.3, 43.1, 35.2, 20.7.

**HRMS (ESI)**: *m/z* calcd. for: C<sub>19</sub>H<sub>18</sub>N<sub>2</sub>O<sub>8</sub>Na<sup>+</sup> [M+Na]<sup>+</sup>: 425.0955, found : 425.0955.

**(R)-Dimethyl-2-(3-benzoyl-2,4-dioxo-5-(phenylethynyl)-3,4-dihydropyrimidin-1(2H)-yl) cyclopropane-1,1-dicarboxylate (3ja)**

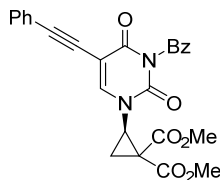

Colorless oil; 86% yield, 20.3 mg, 77% ee.  $[\alpha]_D^{25} = -47.0$  (c = 0.8, CH<sub>2</sub>Cl<sub>2</sub>).

**HPLC** CHIRALCEL IA, *n*-hexane/2-propanol = 70/30, flow rate = 0.8 mL/min,  $\lambda = 254$  nm, retention time: 18.637 min, 20.815 min.

**<sup>1</sup>H NMR** (600 MHz, Chloroform-*d*)  $\delta$  7.92 (d, *J* = 7.8 Hz, 2H), 7.63 (t, *J* = 7.2 Hz, 1H), 7.58 (s, 1H), 7.48 (t, *J* = 7.2 Hz, 4H), 7.33 (s, 3H), 4.01 (t, *J* = 7.2 Hz, 1H), 3.77 (s, 3H), 3.67 (s, 3H), 2.25 (t, *J* = 6.6 Hz, 1H), 2.03 (t, *J* = 7.2 Hz, 1H).

**<sup>13</sup>C NMR** (150 MHz, Chloroform-*d*)  $\delta$  167.3, 167.2, 166.6, 160.2, 149.1, 144.9, 135.3, 131.7, 131.1, 130.7, 129.2, 128.9, 128.4, 122.3, 100.7, 94.7, 79.3, 53.4, 53.3, 43.0, 34.6, 20.2.

**HRMS (ESI)**: *m/z* calcd. for: C<sub>26</sub>H<sub>20</sub>N<sub>2</sub>O<sub>7</sub>Na<sup>+</sup> [M+Na]<sup>+</sup>: 495.1163, found: 495.1162.

**(R)-Dimethyl-2-(3-(4-chlorobenzoyl)-5-methyl-2,4-dioxo-3,4-dihydropyrimidin-1(2H)-yl) cyclopropane-1,1-dicarboxylate (3ka)**

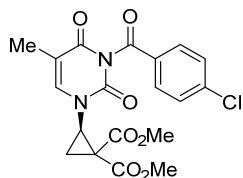

Colorless oil; 93% yield, 19.5 mg, 92% ee.  $[\alpha]_D^{25} = -43.6$  ( $c = 1.7$ ,  $\text{CH}_2\text{Cl}_2$ ).

**HPLC** CHIRALCEL IA, *n*-hexane/2-propanol = 70/30, flow rate = 0.8 mL/min,  $\lambda = 254$  nm, retention time: 14.118 min, 16.072 min.

**$^1\text{H}$  NMR** (600 MHz, Chloroform-*d*)  $\delta$  7.83 (d,  $J = 7.8$  Hz, 2H), 7.45 (s, 2H), 7.08 (s, 1H), 3.94 (t,  $J = 7.2$  Hz, 1H), 3.77 (s, 3H), 3.67 (s, 3H), 2.20 (t,  $J = 6.6$  Hz, 1H), 1.99 (t,  $J = 7.2$  Hz, 1H), 1.95 (s, 3H).

**$^{13}\text{C}$  NMR** (100 MHz, Chloroform-*d*)  $\delta$  167.6, 167.5, 166.9, 162.8, 150.2, 141.9, 139.1, 132.1, 130.1, 129.6, 111.1, 53.4, 42.8, 34.8, 20.5, 12.6.

**HRMS (ESI)**:  $m/z$  calcd. for:  $\text{C}_{19}\text{H}_{17}\text{ClN}_2\text{O}_7\text{Na}^+[\text{M}+\text{Na}]^+$ : 443.0616, found: 443.0615.

**(R)-Dimethyl-2-(3-(4-bromobenzoyl)-5-methyl-2,4-dioxo-3,4-dihydropyrimidin-1(2H)-yl) cyclopropane-1,1-dicarboxylate (3la)**

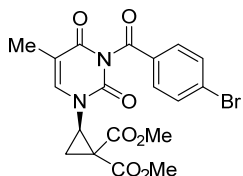

Colorless oil; 83% yield, 19.3 mg, 93% ee.  $[\alpha]_D^{25} = -68.4$  ( $c = 1.3$ ,  $\text{CH}_2\text{Cl}_2$ ).

**HPLC** CHIRALCEL IA, *n*-hexane/2-propanol = 70/30, flow rate = 0.8 mL/min,  $\lambda = 254$  nm, retention time: 14.118 min, 16.072 min.

**$^1\text{H}$  NMR** (600 MHz, Chloroform-*d*)  $\delta$  7.74 (d,  $J = 8.4$  Hz, 2H), 7.61 (d,  $J = 7.8$  Hz, 2H), 7.08 (s, 1H), 3.94 (t,  $J = 7.2$  Hz, 1H), 3.76 (s, 3H), 3.66 (s, 3H), 2.20 (t,  $J = 6.6$  Hz, 1H), 1.99 (t,  $J = 7.2$  Hz, 1H), 1.94 (s, 3H).

**$^{13}\text{C}$  NMR** (150 MHz, Chloroform-*d*)  $\delta$  167.8, 167.6, 166.9, 162.8, 150.2, 139.1, 132.6, 132.0, 130.7, 130.6, 111.2, 53.4, 42.8, 34.8, 29.8, 20.5, 12.7.

**HRMS (ESI)**:  $m/z$  calcd. for:  $\text{C}_{19}\text{H}_{17}\text{BrN}_2\text{O}_7\text{Na}^+[\text{M}+\text{Na}]^+$ : 487.0111, found : 487.0111.

**(R)-Dimethyl-2-(3-(tert-butoxycarbonyl)-5-methyl-2,4-dioxo-3,4-dihydropyrimidin-1(2H)-yl) cyclopropane-1,1-dicarboxylate (3ma)**

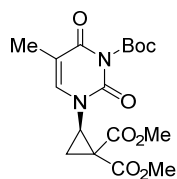

Colorless oil; 96% yield, 18.3 mg, 94% ee.  $[\alpha]_D^{25} = -22.7$  ( $c = 1.7$ ,  $\text{CH}_2\text{Cl}_2$ ).

**HPLC** CHIRALCEL ID, *n*-hexane/2-propanol = 70/30, flow rate = 0.8 mL/min,  $\lambda = 254$  nm, retention time: 27.175 min, 35.203 min.

**$^1\text{H}$  NMR** (400 MHz, Chloroform-*d*)  $\delta$  6.95 (s, 1H), 4.01 (t,  $J = 7.6$  Hz, 1H), 3.79 (s, 3H), 3.71 (s, 3H), 2.27 (t,  $J = 6.4$  Hz, 1H), 1.91 (s, 4H), 1.58 (s, 9H).

**$^{13}\text{C}$  NMR** (150 MHz, Chloroform-*d*)  $\delta$  167.8, 166.3, 161.4, 149.3, 147.6, 138.4, 110.6, 86.9, 53.5, 53.3, 43.0, 35.2, 27.6, 20.1, 12.6.

**HRMS (ESI)**:  $m/z$  calcd. for:  $\text{C}_{17}\text{H}_{22}\text{N}_2\text{O}_8\text{Na}^+ [\text{M}+\text{Na}]^+$ : 405.1268, found 405.1266.

**(R)-Diethyl-2-(3-benzoyl-5-methyl-2,4-dioxo-3,4-dihydropyrimidin-1(2H)-yl) cyclopropane-1,1-dicarboxylate (3ab)**

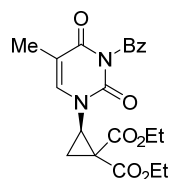

Colorless oil; 84% yield, 17.4 mg, 92% ee.  $[\alpha]_D^{25} = -56.7$  ( $c = 1.9$ ,  $\text{CH}_2\text{Cl}_2$ ).

**HPLC** CHIRALCEL ID, *n*-hexane/2-propanol = 70/30, flow rate = 0.8 mL/min,  $\lambda = 254$  nm, retention time: 49.228 min, 70.623 min.

**$^1\text{H}$  NMR** (600 MHz, Chloroform-*d*)  $\delta$  7.88 (d,  $J = 7.8$  Hz, 2H), 7.61 (t,  $J = 7.2$  Hz, 1H), 7.46 (t,  $J = 7.8$  Hz, 2H), 7.09 (s, 1H), 4.24 – 4.15 (m, 3H), 4.04 (s, 1H), 3.97 (t,  $J = 7.2$  Hz, 1H), 2.22 (t,  $J = 6.6$  Hz, 1H), 1.93 (s, 3H), 1.91 (d,  $J = 7.2$  Hz, 1H), 1.25 (t,  $J = 7.2$  Hz, 4H), 1.16 (t,  $J = 7.2$  Hz, 3H).

**$^{13}\text{C}$  NMR** (150 MHz, Chloroform-*d*)  $\delta$  168.5, 167.2, 166.2, 162.9, 150.1, 139.1, 135.1, 131.6, 130.7, 129.1, 110.8, 62.4, 62.3, 42.6, 35.2, 20.1, 14.1, 14.0, 12.6

**HRMS (ESI)**:  $m/z$  calcd. for:  $\text{C}_{21}\text{H}_{22}\text{N}_2\text{O}_7\text{H}^+ [\text{M}+\text{H}]^+$ : 415.1500, found : 415.1487.

**(R)-Dimethyl-2-(4-(di-Boc-amino)-2-oxopyrimidin-1(2H)-yl) cyclopropane-1,1-dicarboxylate (3na)**

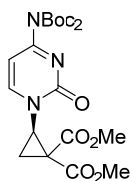

White solid; m.p.: 172.1 – 175.8 °C. 89% yield, 20.8 mg, 83% ee.  $[\alpha]_D^{25} = 80.2$  (c = 3.6, CH<sub>2</sub>Cl<sub>2</sub>).

**HPLC** CHIRALCEL IA, *n*-hexane/2-propanol = 70/30, flow rate = 0.8 mL/min,  $\lambda = 254$  nm, retention time: 8.548 min, 11.892 min.

**<sup>1</sup>H NMR** (400 MHz, Chloroform-*d*)  $\delta$  7.44 (d, *J* = 7.6 Hz, 1H), 7.03 (d, *J* = 7.2 Hz, 1H), 4.21 (dd, *J* = 8.0, 6.8 Hz, 1H), 3.80 (s, 3H), 3.64 (s, 3H), 2.29 (t, *J* = 6.8 Hz, 1H), 1.97 (dd, *J* = 8.4, 6.8 Hz, 1H), 1.54 (s, 18H).

**<sup>13</sup>C NMR** (100 MHz, Chloroform-*d*)  $\delta$  167.9, 166.3, 162.7, 155.1, 149.5, 146.3, 96.0, 85.2, 53.4, 53.3, 44.8, 35.0, 27.8, 19.6.

**HRMS (ESI)**: *m/z* calcd. for: C<sub>22</sub>H<sub>24</sub>N<sub>2</sub>O<sub>7</sub>Na<sup>+</sup>[M+Na]<sup>+</sup>: 490.1796, found : 490.1793.

**(R)-Dimethyl-2-(2,4-dioxo-3,4-dihydropyrimidin-1(2H)-yl) cyclopropane-1,1-dicarboxylate (4ba)**

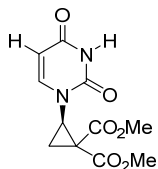

White solid; m.p.: 172.1 – 175.8 °C. 81% yield, 21.7 mg, 84% ee.  $[\alpha]_D^{25} = -14.3$  (c = 1.6, CH<sub>2</sub>Cl<sub>2</sub>).

**HPLC** CHIRALCEL IA, *n*-hexane/2-propanol = 70/30, flow rate = 0.8 mL/min,  $\lambda = 254$  nm, retention time: 15.363 min, 18.775 min.

**<sup>1</sup>H NMR** (600 MHz, DMSO-*d*<sub>6</sub>)  $\delta$  11.3 (s, 1H), 7.58 (d, *J* = 8.4 Hz, 1H), 5.52 (d, *J* = 8.4 Hz, 1H), 3.97 (t, *J* = 7.2 Hz, 1H), 3.71 (s, 3H), 3.56 (s, 3H), 2.34 (t, *J* = 6.6 Hz, 1H), 1.93 (t, *J* = 7.8 Hz, 1H).

**<sup>13</sup>C NMR** (150 MHz, DMSO-*d*<sub>6</sub>)  $\delta$  168.0, 166.4, 163.8, 150.5, 144.8, 101.3, 53.3, 53.2, 34.8, 19.5.

**HRMS (ESI)**: *m/z* calcd. for: C<sub>22</sub>H<sub>24</sub>N<sub>2</sub>O<sub>7</sub>Na<sup>+</sup>[M+Na]<sup>+</sup>: 291.0588, found : 291.0586.



**(2*S*,5*S*)-Dimethyl-5-(3-benzoyl-5-methyl-2,4-dioxo-3,4-dihydropyrimidin-1(2*H*)-yl)-2-phenyldihydrofuran-3,3(2*H*)-dicarboxylate (6aa)**

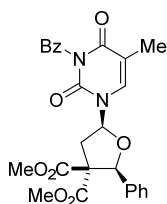

Colorless oil; 68% yield, 33.5 mg, >20:1 dr, 50% ee.  $[\alpha]_D^{25} = 0.72$  ( $c = -9.1$ ,  $\text{CH}_2\text{Cl}_2$ ).

**HPLC** CHIRALCEL IA, *n*-hexane/2-propanol = 70/30, flow rate = 0.8 mL/min,  $\lambda = 254$  nm, retention time: 12.173 min, 19.650 min.

**<sup>1</sup>H NMR** (600 MHz, Chloroform-*d*)  $\delta$  8.07 (s, 1H), 7.95 (d,  $J = 7.8$  Hz, 2H), 7.64 (t,  $J = 7.2$  Hz, 1H), 7.48 (dd,  $J = 18.0, 7.2$  Hz, 4H), 7.38-7.33(m, 3H), 6.36 (t,  $J = 7.2$  Hz, 1H), 5.61 (s, 1H), 3.80 (s, 3H), 3.15 (s, 3H), 2.99 (dd,  $J = 8.4, 7.2$  Hz, 1H), 2.80 (dd,  $J = 14.4, 7.8$  Hz, 1H), 2.10 (s, 3H).

**<sup>13</sup>C NMR** (150 MHz, Chloroform-*d*)  $\delta$  170.0, 169.9, 168.9, 136.0, 135.2, 131.7, 130.7, 129.3, 129.0, 128.3, 126.7, 112.2, 82.6, 81.7, 63.9, 53.3, 52.9, 39.3, 13.1.

**HRMS (ESI)**:  $m/z$  calcd. for:  $\text{C}_{26}\text{H}_{24}\text{N}_2\text{O}_8\text{Na}^+ [\text{M}+\text{Na}]^+$ : 515.1425, found : 515.1423.

**(2*R*, 5*S*)-2-Ethyl 3,3-dimethyl-5-(3-benzoyl-5-methyl-2,4-dioxo-3,4-dihydropyrimidin-1(2*H*)-yl) dihydrofuran-2,3,3(2*H*)-tricarboxylate (8aa)**

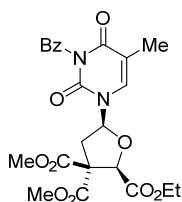

Colorless oil; 35% yield, 17.1 mg, 86% ee.  $[\alpha]_D^{25} = -6.5$  ( $c = 0.81$ ,  $\text{CH}_2\text{Cl}_2$ ).

**HPLC** CHIRALCEL IA, *n*-hexane/2-propanol = 70/30, flow rate = 0.8 mL/min,  $\lambda = 254$  nm, retention time: 12.955 min, 14.542 min.

**<sup>1</sup>H NMR** (400 MHz, Chloroform-*d*)  $\delta$  8.13 (d,  $J = 1.2$  Hz, 1H), 7.96 – 7.87 (m, 2H), 7.64 (t,  $J = 7.6$  Hz, 1H), 7.49 (t,  $J = 8.4$  Hz, 2H), 6.26 (dd,  $J = 8.0, 5.6$  Hz, 1H), 5.18 (s, 1H), 4.32 – 4.20 (m, 2H), 3.84 (s, 3H), 3.76 (s, 3H), 2.97 (dd,  $J = 13.6, 5.6$  Hz, 1H), 2.86 (dd,  $J = 13.6, 8.4$  Hz, 1H), 2.01 (d,  $J = 1.3$  Hz, 3H), 1.33 (t,  $J = 7.2$  Hz, 3H).

**<sup>13</sup>C NMR** (150 MHz, Chloroform-*d*)  $\delta$  169.8, 168.9, 168.4, 167.1, 162.8, 149.6, 135.8, 135.8, 135.2, 131.7, 130.6, 129.3, 111.6, 85.4, 80.4, 63.2, 62.4, 54.2, 53.7, 38.3, 14.2, 12.9.

**HRMS (ESI)**:  $m/z$  calcd. for:  $\text{C}_{23}\text{H}_{24}\text{N}_2\text{O}_{10}\text{Na}^+ [\text{M}+\text{Na}]^+$ : 511.1323, found : 511.1322.

**(2*S*, 5*S*)-2-Ethyl 3, 3-dimethyl-5-(3-benzoyl-5-methyl-2,4-dioxo-3,4-dihydropyrimidin-1(2*H*)-yl) dihydrofuran-2,3,3(2*H*)-tricarboxylate (9aa)**

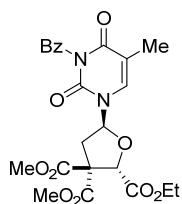

Colorless oil; 37% yield, 18.1 mg, 94% ee.  $[\alpha]_D^{25} = -8.6$  (c = 1.2, CH<sub>2</sub>Cl<sub>2</sub>).

**HPLC** CHIRALCEL IA, *n*-hexane/2-propanol = 70/30, flow rate = 0.8 mL/min,  $\lambda = 254$  nm, retention time: 16.382 min, 19.677 min.

**<sup>1</sup>H NMR** (400 MHz, Chloroform-*d*)  $\delta$  7.92 – 7.90 (m, 2H), 7.65 (t, *J* = 7.5 Hz, 1H), 7.49 (t, *J* = 8.0 Hz, 2H), 7.29 (d, *J* = 1.2 Hz, 1H), 6.35 (dd, *J* = 6.8, 4.4 Hz, 1H), 5.44 (s, 1H), 4.27 (m, 2H), 3.82 (s, 3H), 3.76 (s, 3H), 3.32 (dd, *J* = 14.4, 7.2 Hz, 1H), 2.78 (dd, *J* = 14.4, 4.4 Hz, 1H), 1.97 (d, *J* = 1.2 Hz, 3H), 1.29 (t, *J* = 7.2 Hz, 3H).

**<sup>13</sup>C NMR** (100 MHz, Chloroform-*d*)  $\delta$  169.3, 168.8, 168.3, 167.2, 162.8, 149.2, 135.3, 135.2, 131.6, 130.6, 129.3, 111.0, 87.7, 82.1, 62.9, 62.3, 54.1, 53.7, 39.3, 29.8, 14.2, 12.8.

**HRMS (ESI)**: *m/z* calcd. for : C<sub>23</sub>H<sub>24</sub>N<sub>2</sub>O<sub>10</sub>Na<sup>+</sup>[M+Na]<sup>+</sup> : 511.1323, found : 511.1322.

**(2*R*, 5*S*)-2-Ethyl 3,3-dimethyl-5-(3-benzoyl-2,4-dioxo-3,4-dihydropyrimidin-1(2*H*)-yl) dihydrofuran-2,3,3(2*H*)-tricarboxylate (8ba)**

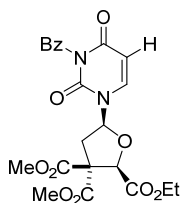

Colorless oil; 47% yield, 22.3 mg, 80% ee.  $[\alpha]_D^{25} = -8.5$  (c = 0.68, CH<sub>2</sub>Cl<sub>2</sub>).

**HPLC** CHIRALCEL IA, *n*-hexane/2-propanol = 70/30, flow rate = 0.8 mL/min,  $\lambda = 254$  nm, retention time: 16.090 min, 21.082 min.

**H NMR** (600 MHz, Chloroform-*d*)  $\delta$  8.31 (d, *J* = 7.8 Hz, 1H), 7.93 (d, *J* = 7.8 Hz, 2H), 7.65 (t, *J* = 7.2 Hz, 1H), 7.49 (t, *J* = 7.8 Hz, 2H), 6.21 (t, *J* = 6.6 Hz, 1H), 5.90 (d, *J* = 8.4 Hz, 1H), 5.18 (s, 1H), 4.35 – 4.17 (m, 2H), 3.83 (s, 3H), 3.76 (s, 3H), 3.00 (dd, *J* = 13.8, 5.4 Hz, 1H), 2.88 (dd, *J* = 13.8, 7.8 Hz, 1H), 1.32 (t, *J* = 7.2 Hz, 3H).

**<sup>13</sup>C NMR** (150 MHz, Chloroform-*d*)  $\delta$  169.7, 168.6, 168.3, 167.1, 162.0, 149.5, 140.1, 135.3, 131.5, 130.6, 129.3, 102.8, 85.9, 80.7, 63.1, 62.5, 54.2, 53.8, 38.7, 14.1.

**HRMS (ESI)**: *m/z* calcd. for : C<sub>22</sub>H<sub>22</sub>N<sub>2</sub>O<sub>10</sub>Na<sup>+</sup> [M+Na]<sup>+</sup> : 497.1167, found : 497.1167.

**(2*S*, 5*S*)-2-Ethyl 3,3-dimethyl-5-(3-benzoyl-2,4-dioxo-3,4-dihydropyrimidin-1(2*H*)-yl) dihydrofuran-2,3,3(2*H*)-tricarboxylate (9ba)**

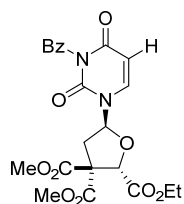

Colorless oil; 24% yield, 10.0 mg, 88% ee.  $[\alpha]_D^{25} = -7.7$  ( $c = 0.65$ ,  $\text{CH}_2\text{Cl}_2$ ).

**HPLC** CHIRALCEL IA, *n*-hexane/2-propanol = 70/30, flow rate = 0.8 mL/min,  $\lambda = 254$  nm, retention time: 18.915 min, 28.347 min.

**$^1\text{H}$  NMR** (600 MHz, Chloroform-*d*)  $\delta$  7.92 (d,  $J = 7.2$  Hz, 2H), 7.66 (t,  $J = 7.2$  Hz, 1H), 7.50 (t,  $J = 8.4$  Hz, 3H), 6.32 (s, 1H), 5.83 (d,  $J = 8.4$  Hz, 1H), 5.44 (s, 1H), 4.25-4.17 (m, 2H), 3.82 (s, 3H), 3.76 (s, 3H), 3.34 (dd,  $J = 14.4, 7.2$  Hz, 1H), 2.81 (s, 1H), 1.29 (t,  $J = 7.2$  Hz, 3H).

**$^{13}\text{C}$  NMR** (150 MHz, Chloroform-*d*)  $\delta$  169.2, 168.5, 168.3, 167.0, 149.1, 139.4, 135.4, 131.5, 130.6, 129.4, 102.2, 88.1, 82.2, 62.7, 62.4, 54.2, 53.8, 39.4, 29.8, 14.1.

**HRMS (ESI)**:  $m/z$  calcd. for:  $\text{C}_{22}\text{H}_{22}\text{N}_2\text{O}_{10}\text{Na}^+$   $[\text{M}+\text{Na}]^+$ : 497.1167, found: 497.1167.

## 10. References

1. (a) H.-X. Wang, F.-J. Guan, M.-S. Xie, G.-R. Qu and H.-M. Guo, *Adv. Synth. Catal.*, 2018, **360**, 2233. (b) M.-S. Xie, P. Zhou, H.-Y. Niu, G.-R. Qu and H.-M. Guo, *Org. Lett.*, 2016, **18**, 4344.
2. S. R. Goudreau, D. Marcoux and A. B. Charette, *J. Org. Chem.*, 2009, **74**, 470.

# 11. Copies of $^1\text{H}$ and $^{13}\text{C}$ NMR spectra

## $^1\text{H}$ NMR of 3aa (400 MHz, Methanol- $d_4$ )

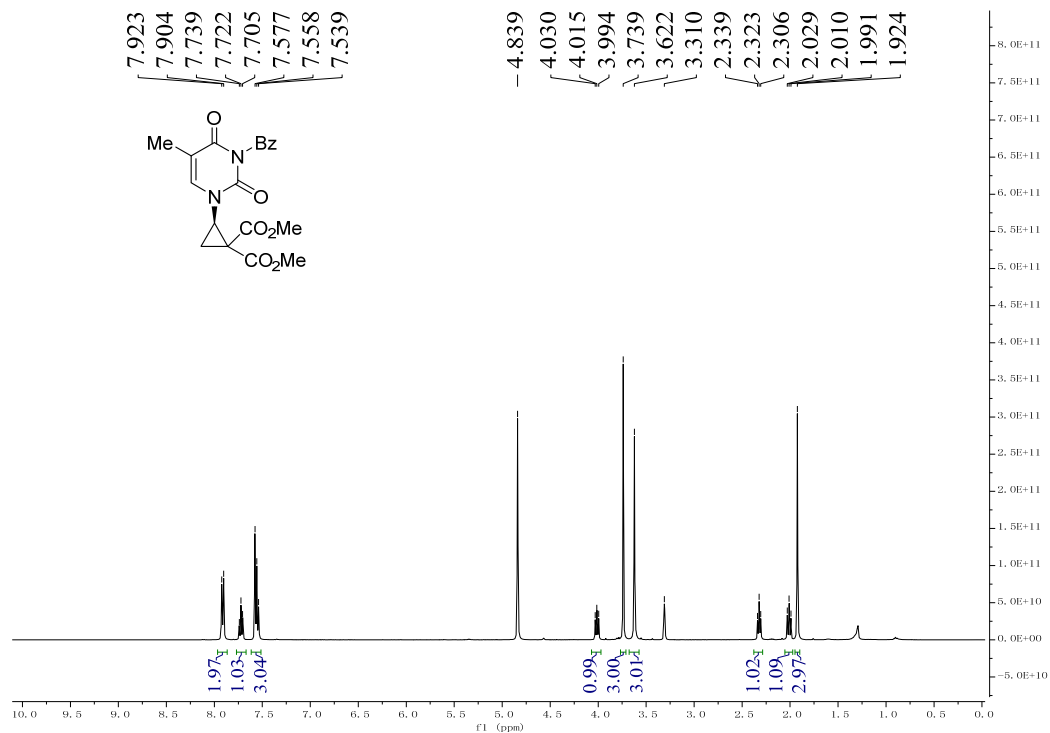

## $^{13}\text{C}$ NMR of 3aa (150 MHz, Chloroform- $d$ )

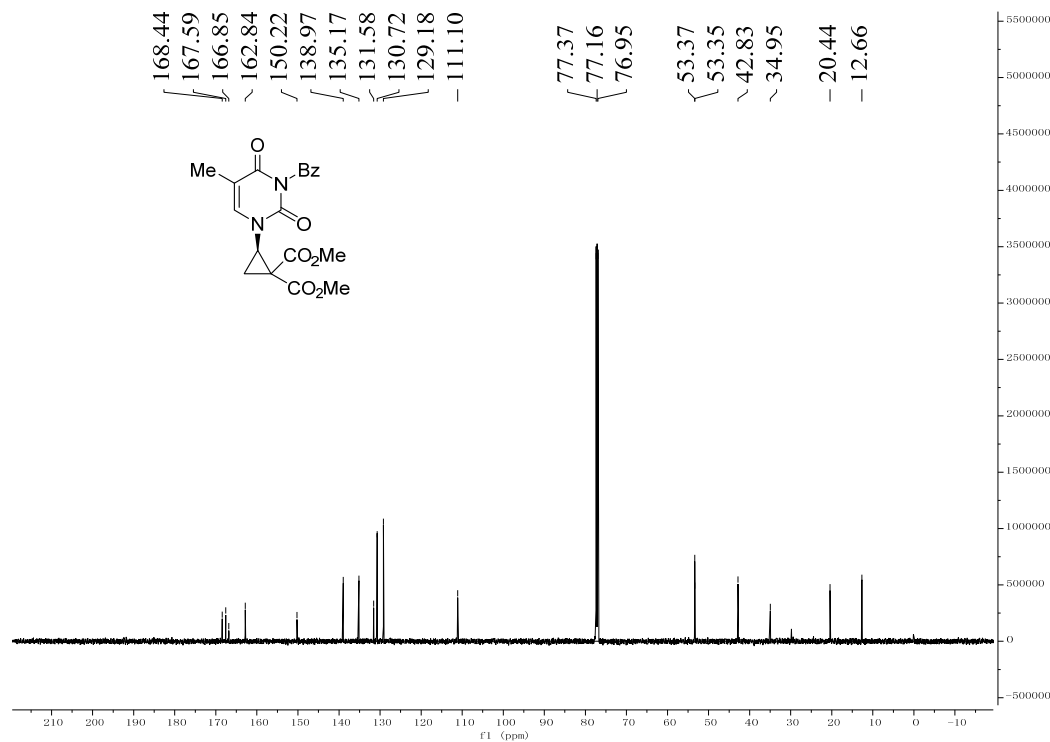

### <sup>1</sup>H NMR of 3ba (600 MHz, Chloroform-d)

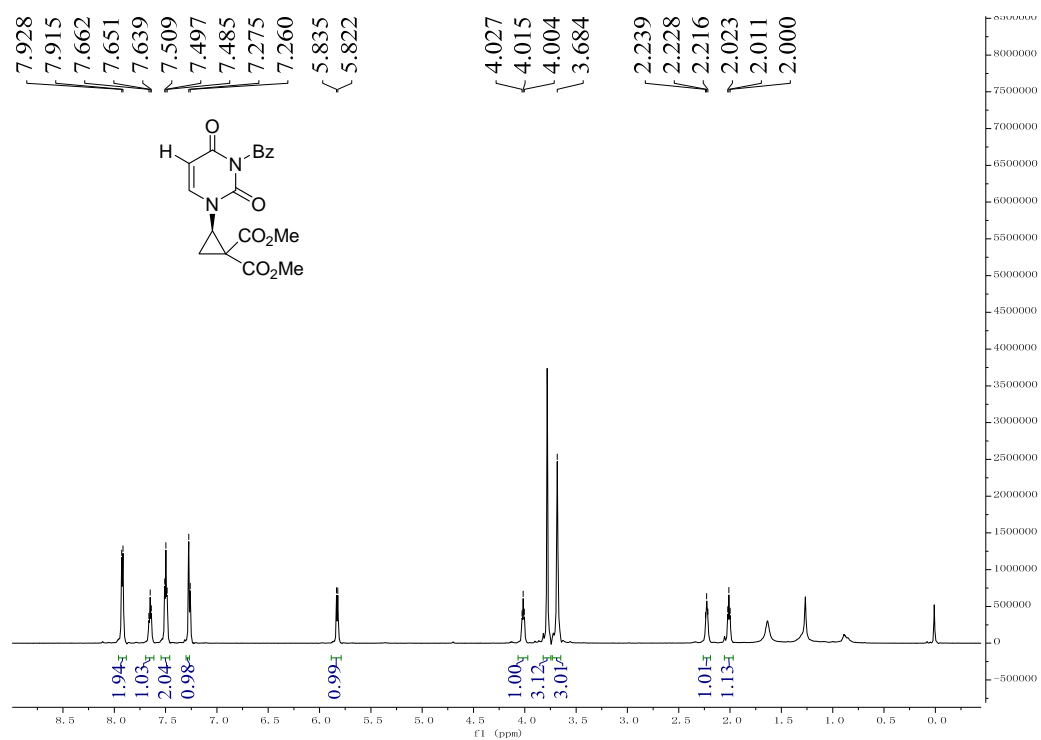

### <sup>13</sup>C NMR of 3ba (150 MHz, Chloroform-d)

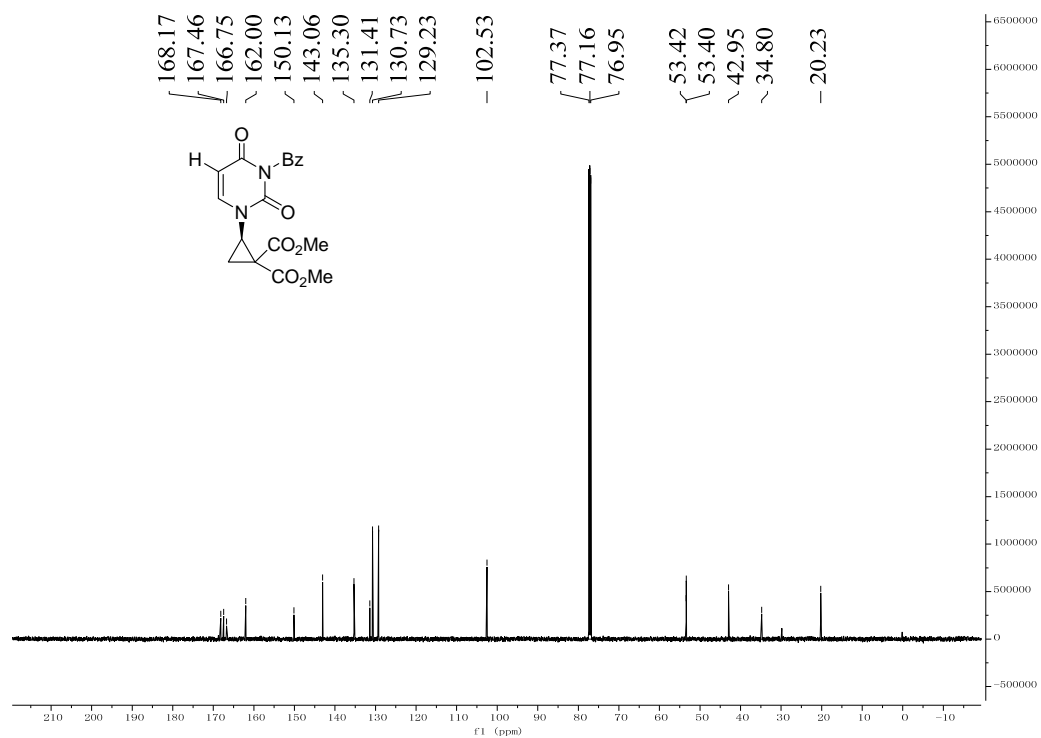

### <sup>1</sup>H NMR of 3ca (600 MHz, Chloroform-*d*)

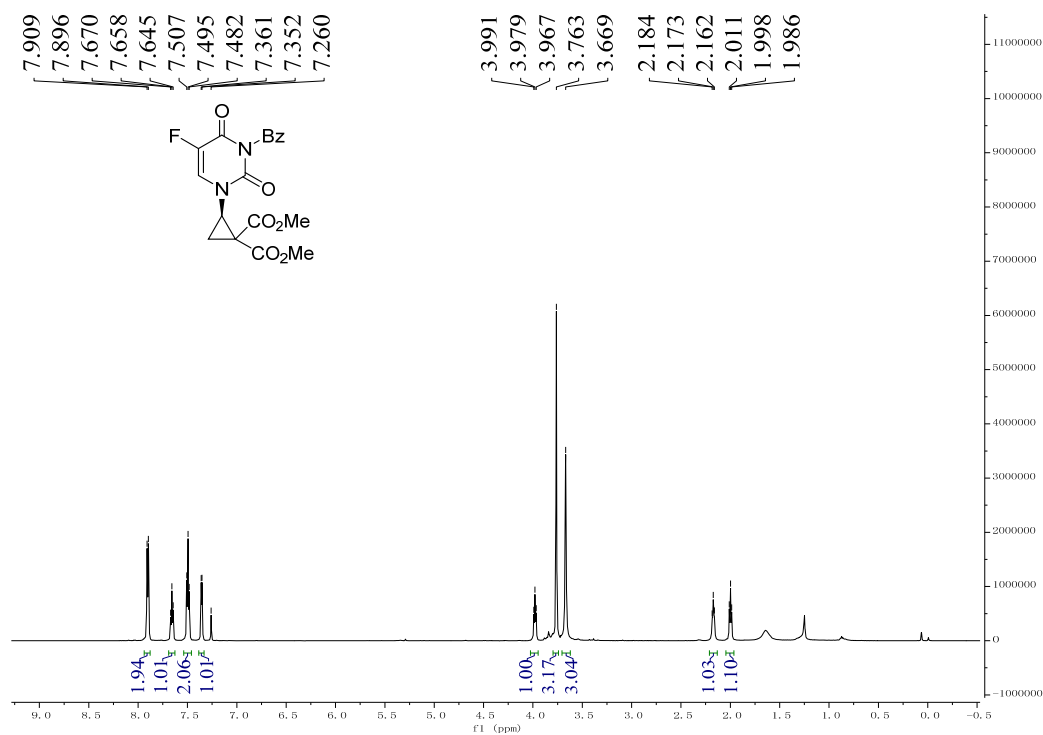

### <sup>13</sup>C NMR of 3ca (150 MHz, Chloroform-*d*)

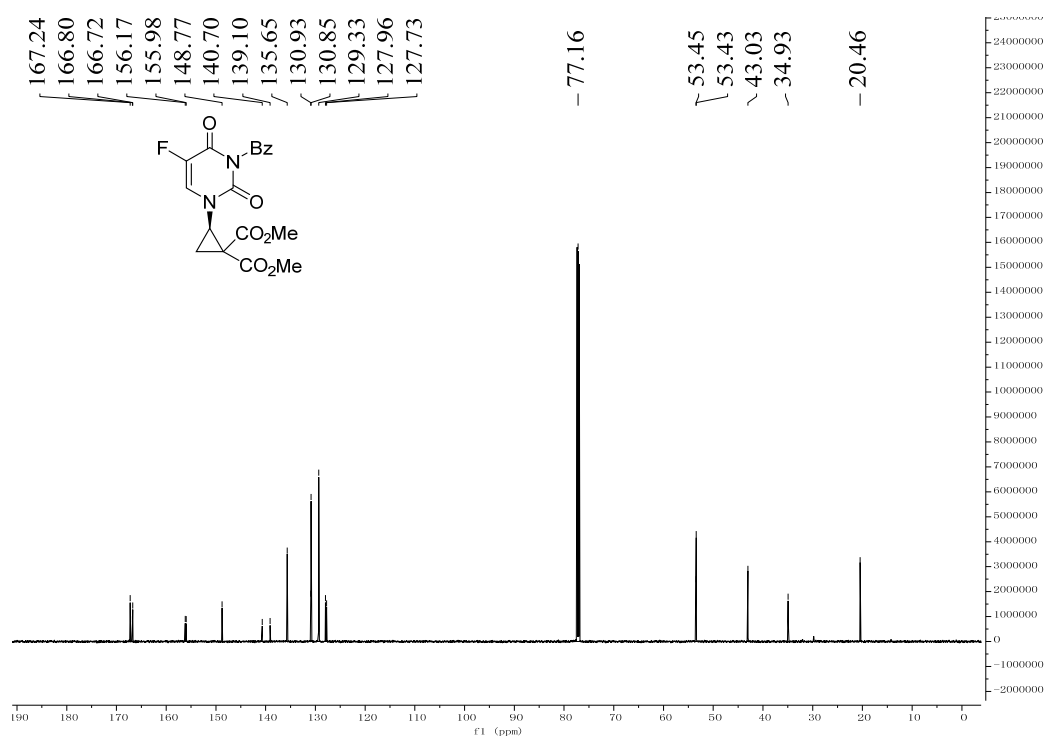

**<sup>19</sup>F NMR of 3ca (376 MHz, Chloroform-d)**

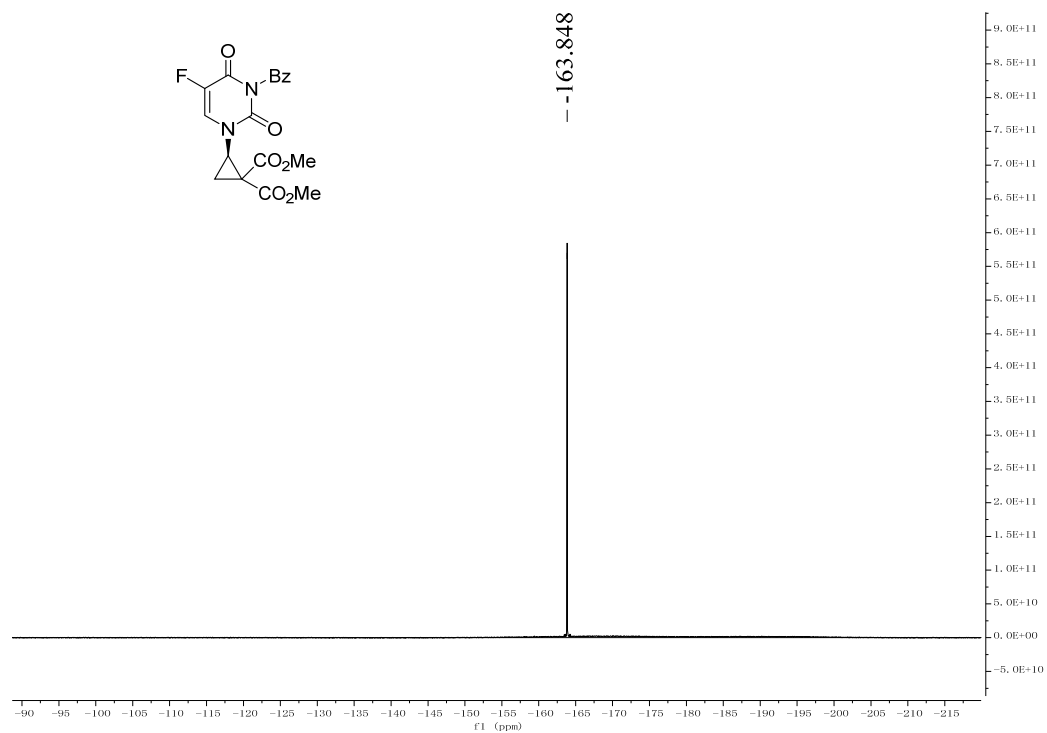



### <sup>1</sup>H NMR of 3da (600 MHz, Chloroform-*d*)

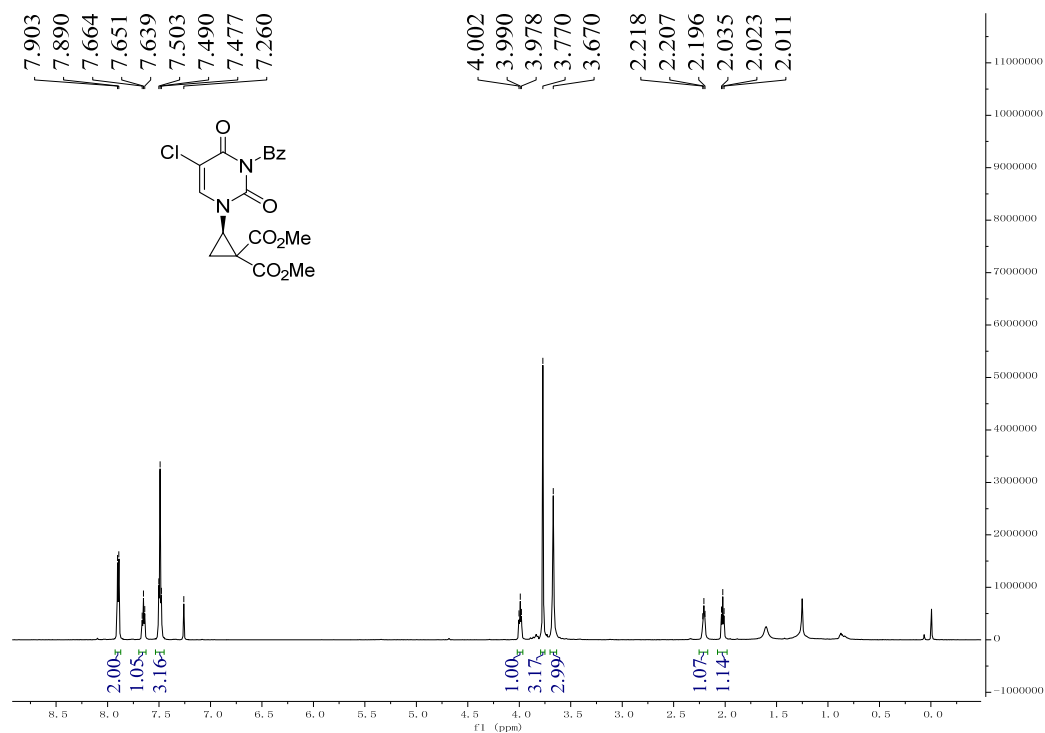

### <sup>13</sup>C NMR of 3da (150 MHz, Chloroform-*d*)

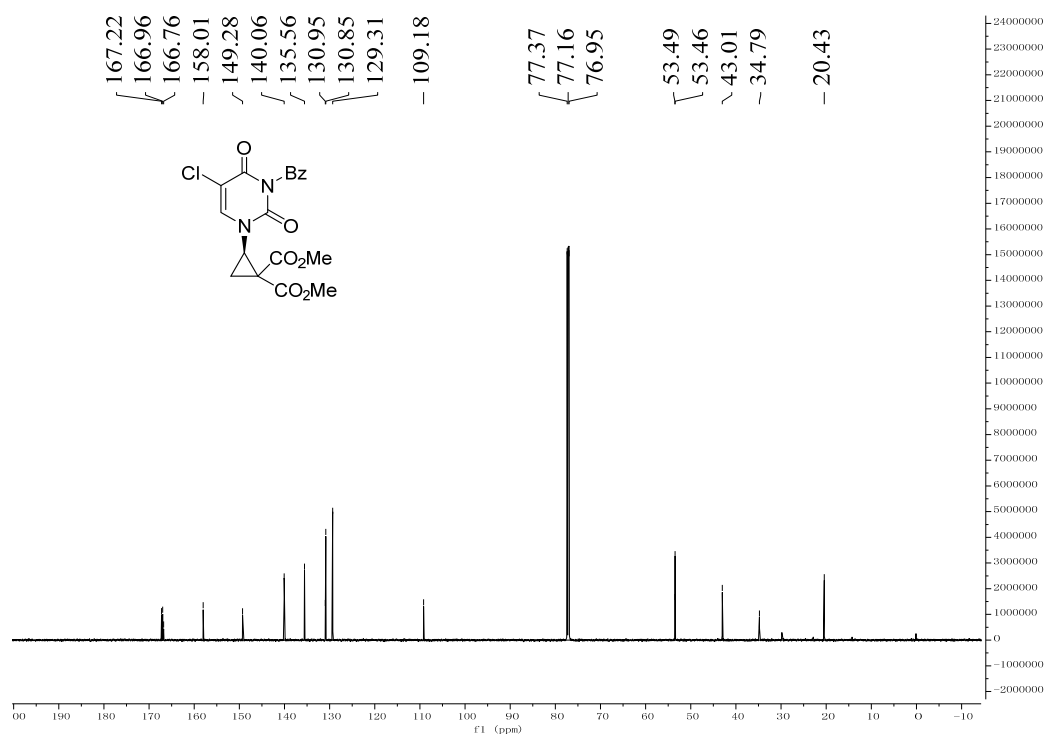

### <sup>1</sup>H NMR of 3ea (600 MHz, Chloroform-d)

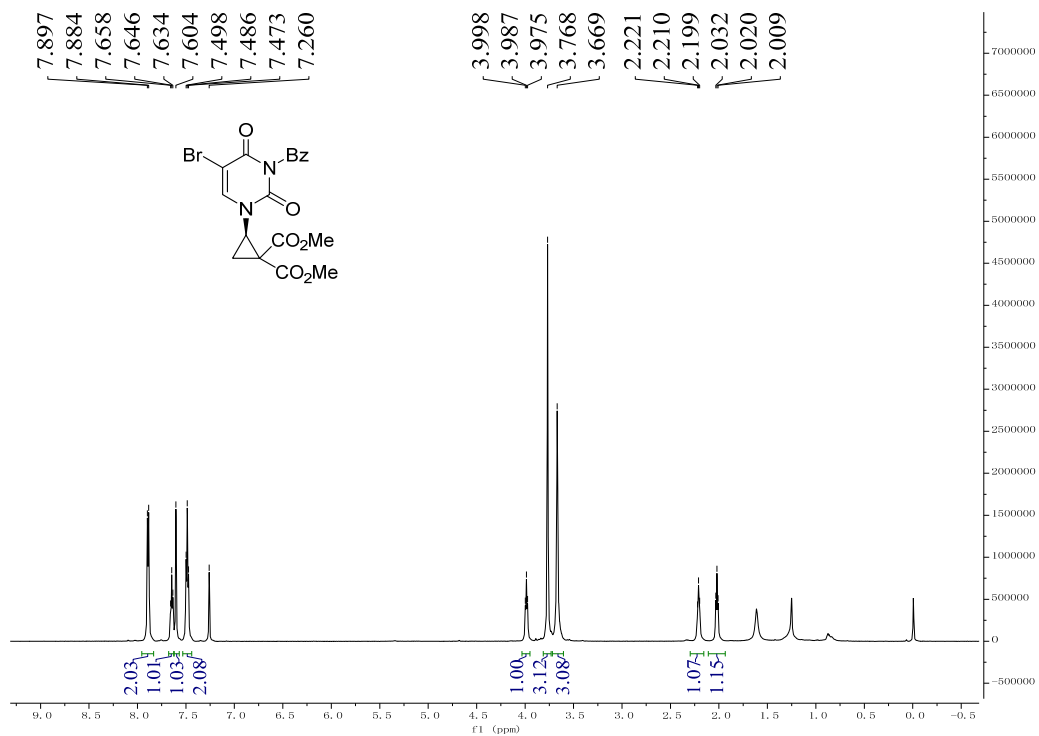

### <sup>13</sup>C NMR of 3ea (150MHz, Chloroform-d)

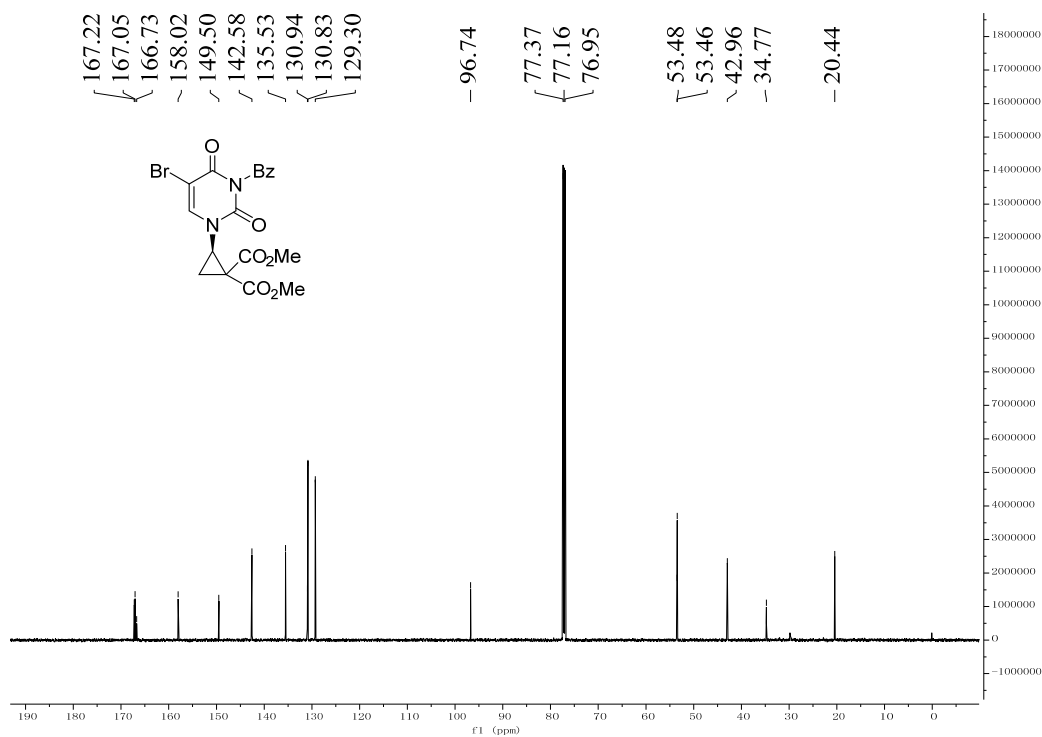

### <sup>1</sup>H NMR of 3fa (400 MHz, Chloroform-*d*)

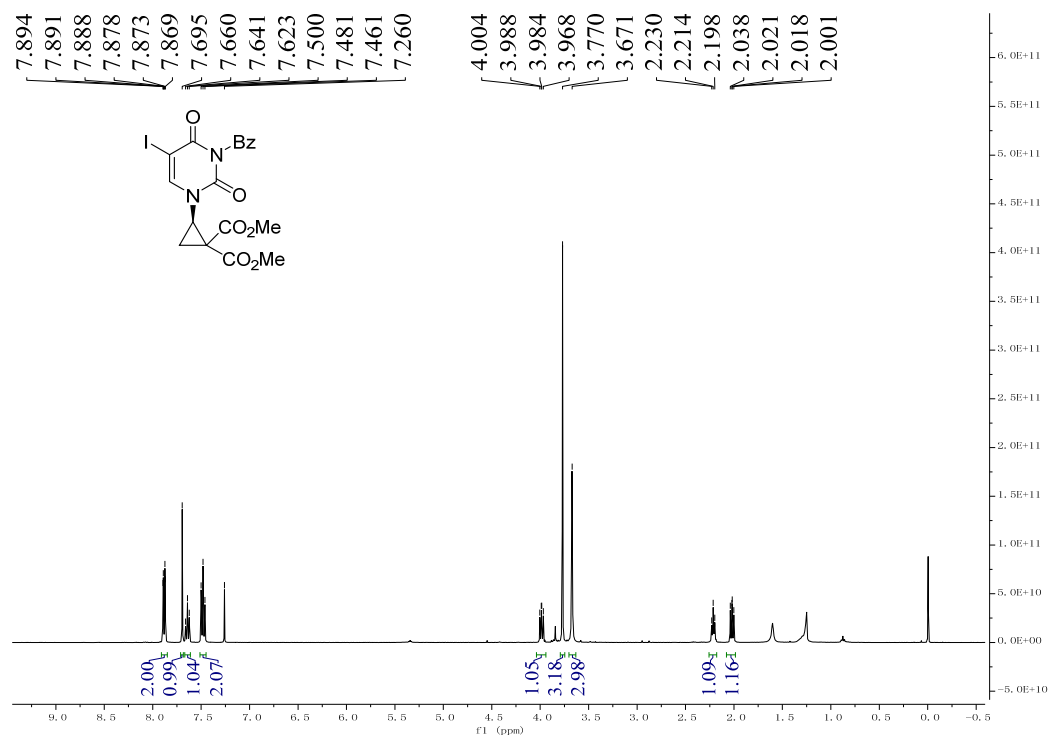

### <sup>13</sup>C NMR of 3fa (100 MHz, Chloroform-*d*)

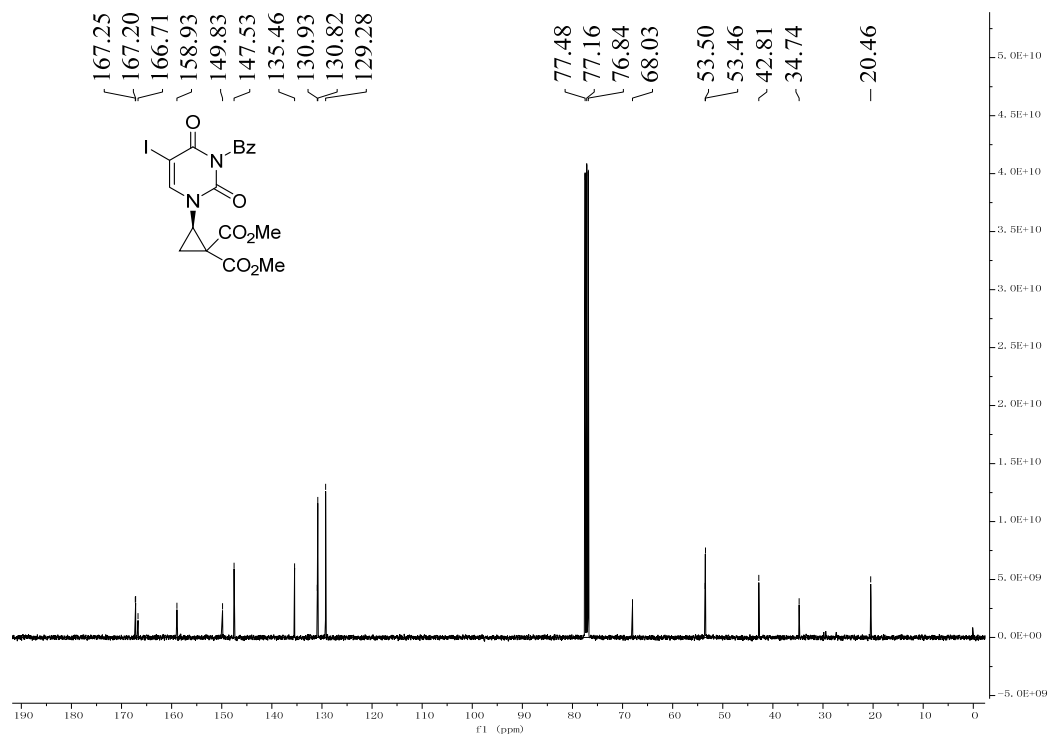

### <sup>1</sup>H NMR of 3ga (600 MHz, Chloroform-d)

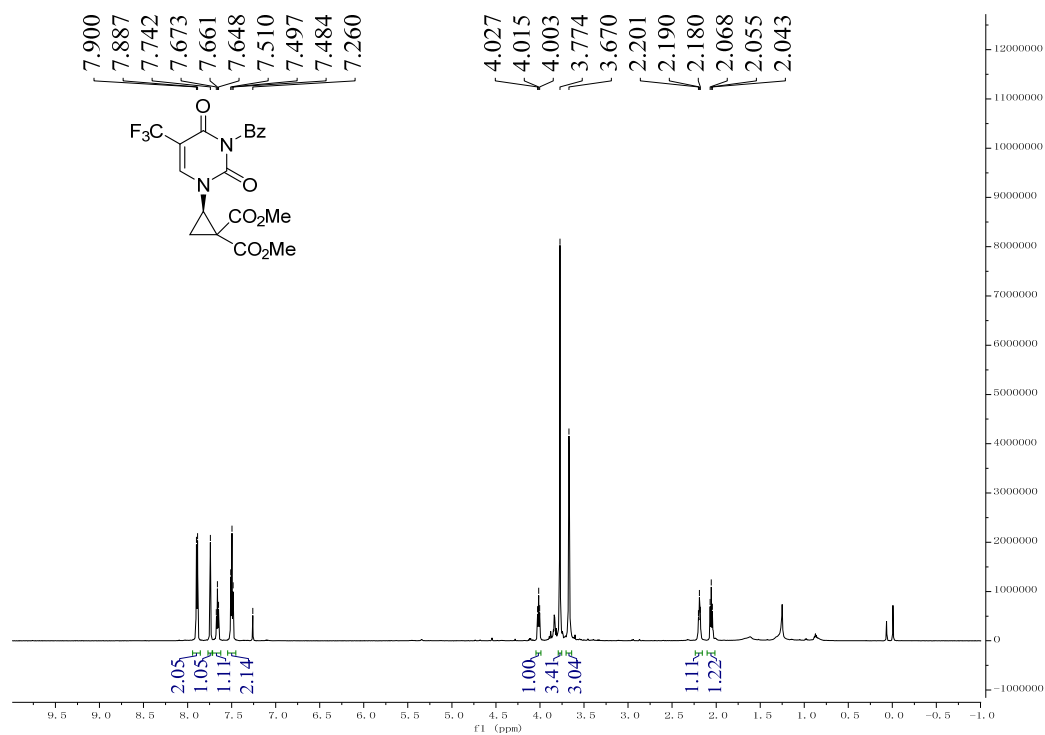

### <sup>13</sup>C NMR of 3ga (150 MHz, Chloroform-d)

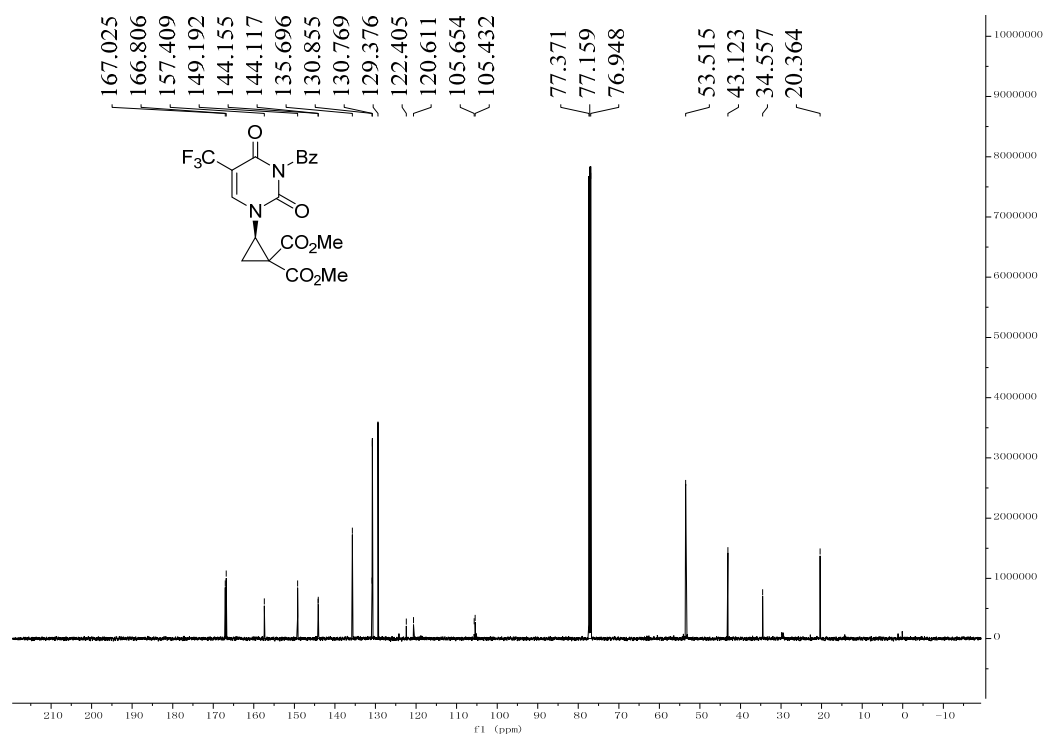

**<sup>19</sup>F NMR of 3ga (376 MHz, Chloroform-*d*)**

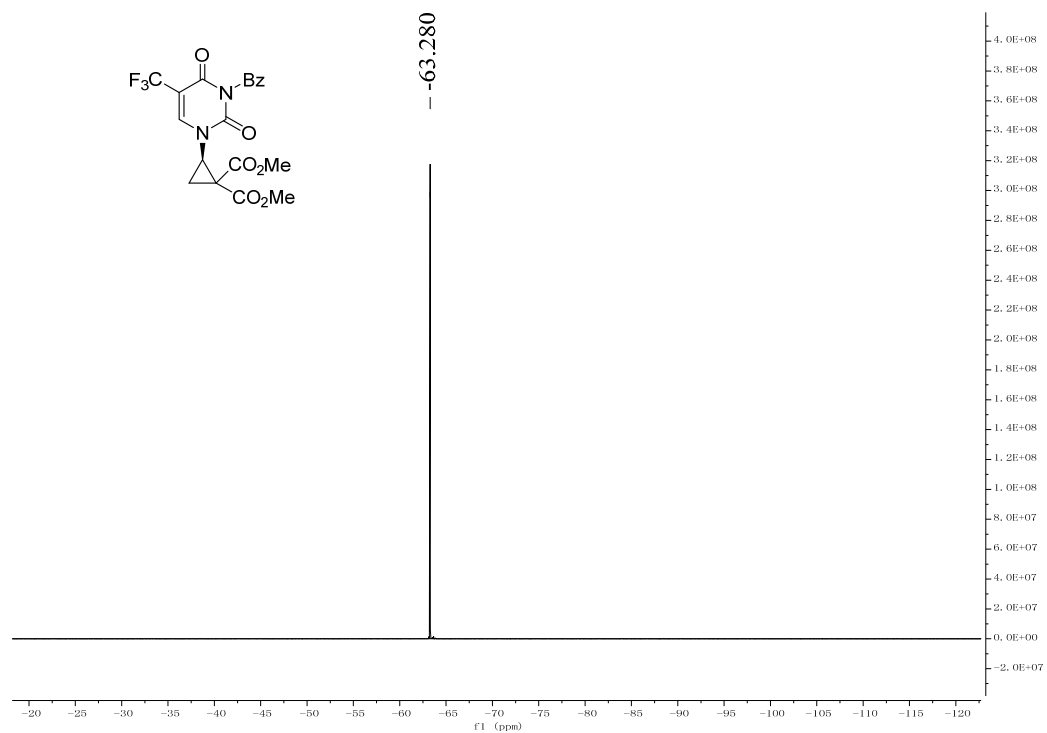

### <sup>1</sup>H NMR of 3ha (400 MHz, Chloroform-d)

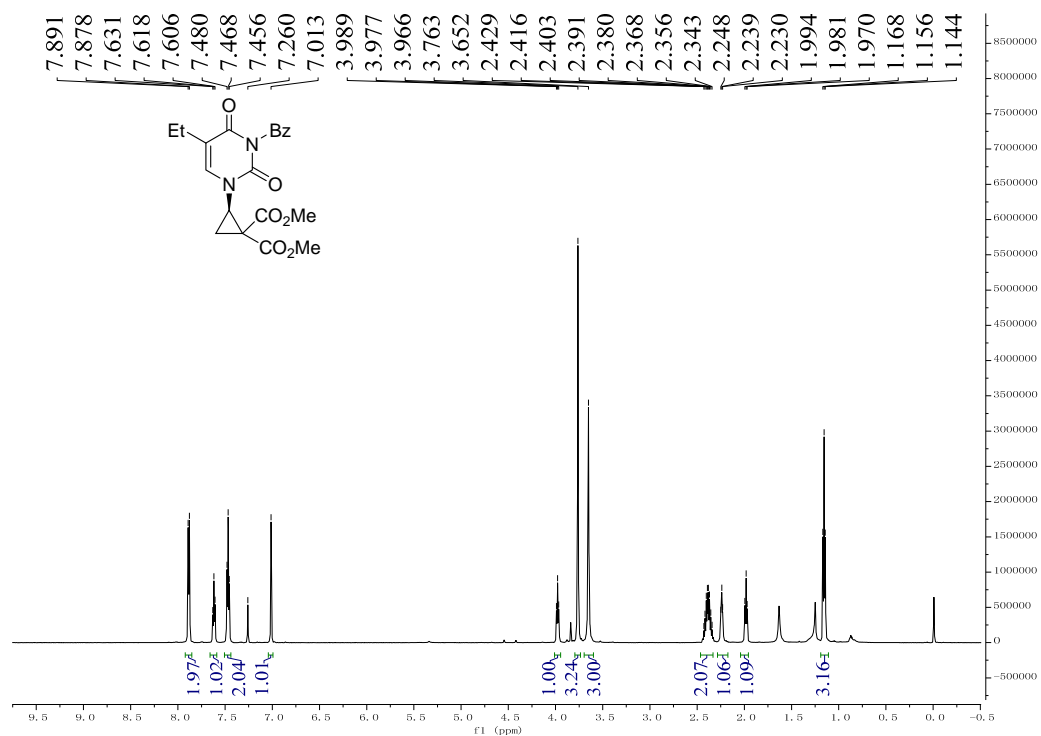

### <sup>13</sup>C NMR of 3ha (100 MHz, Chloroform-d)

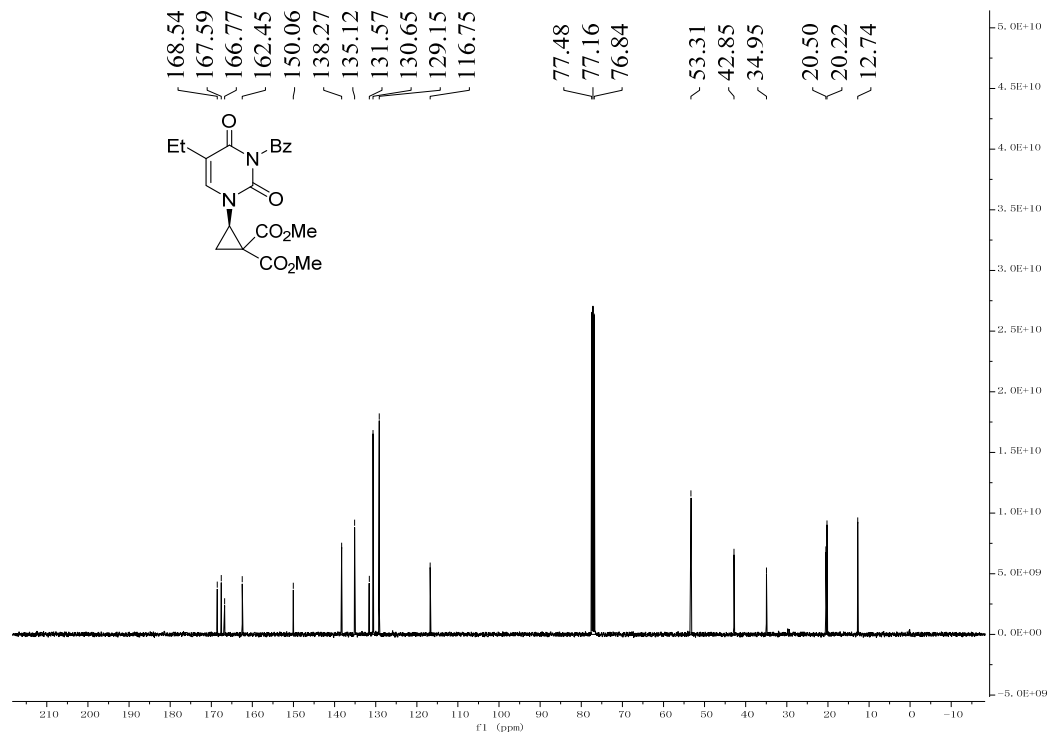

### <sup>1</sup>H NMR of 3ia (400 MHz, Chloroform-*d*)

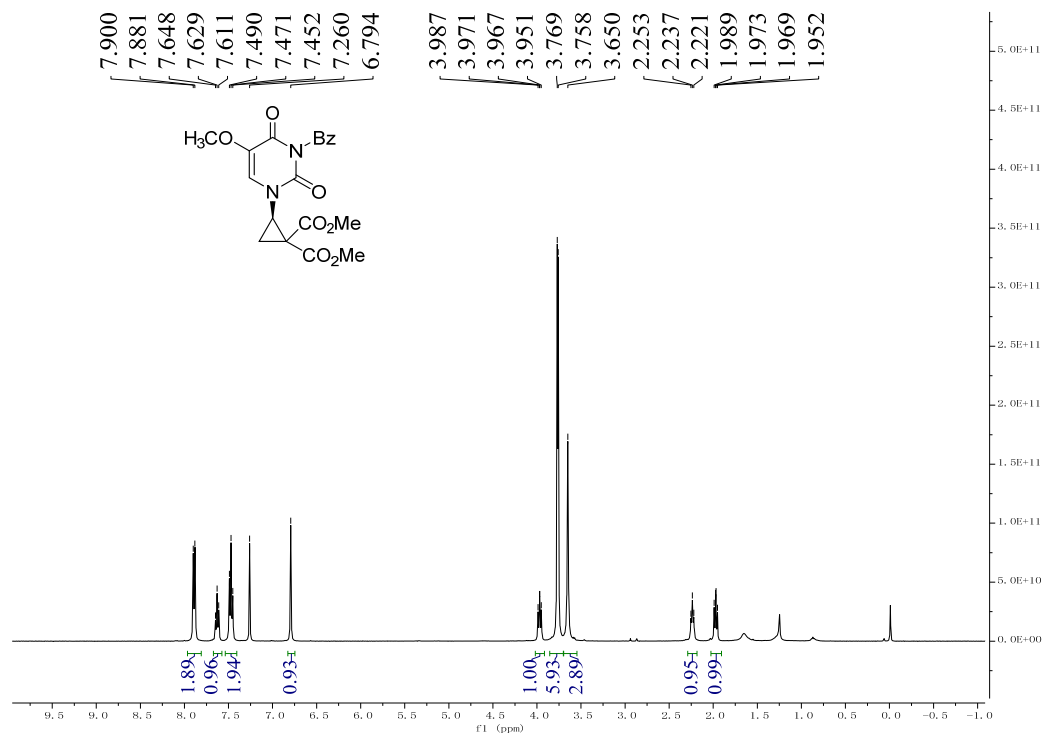

### <sup>13</sup>C NMR of 3ia (100 MHz, Chloroform-*d*)

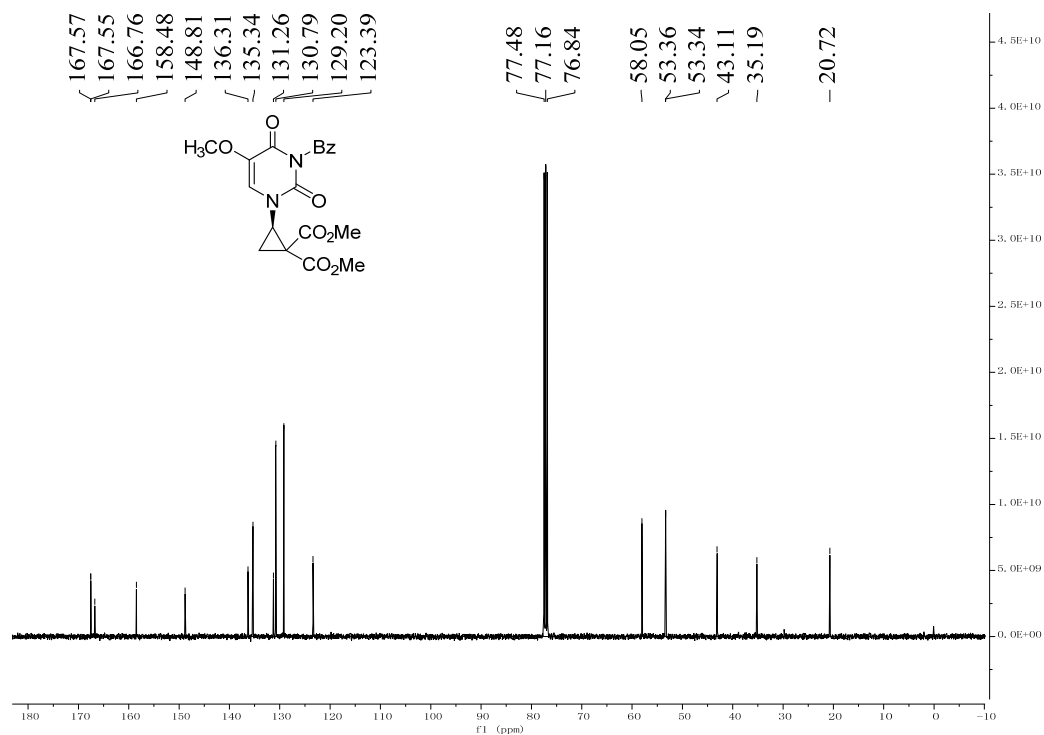

### <sup>1</sup>H NMR of 3ja (600 MHz, Chloroform-*d*)

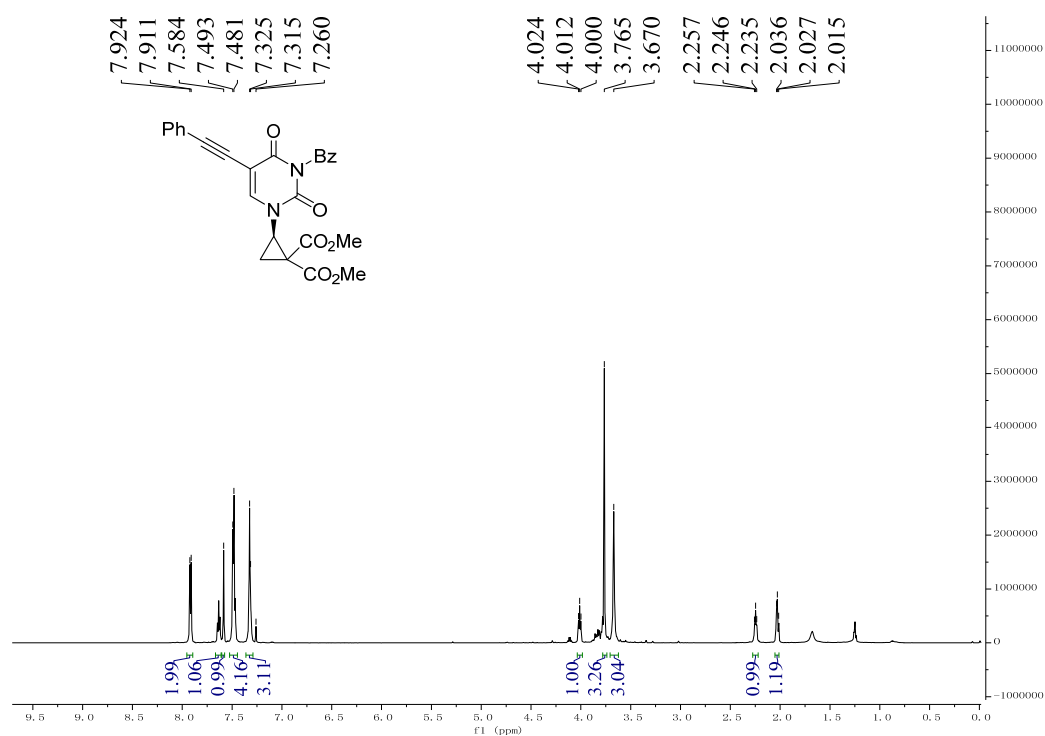

### <sup>13</sup>C NMR of 3ja (150 MHz, Chloroform-*d*)

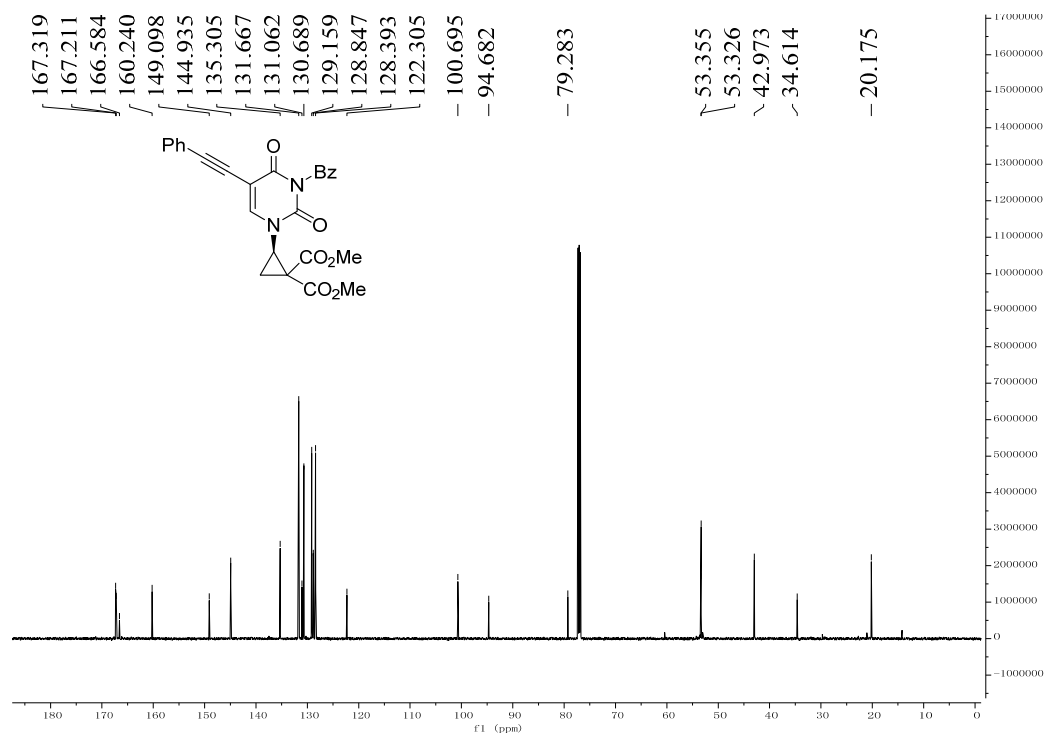



**<sup>1</sup>H NMR of 3ka (600 MHz, Chloroform-d)**

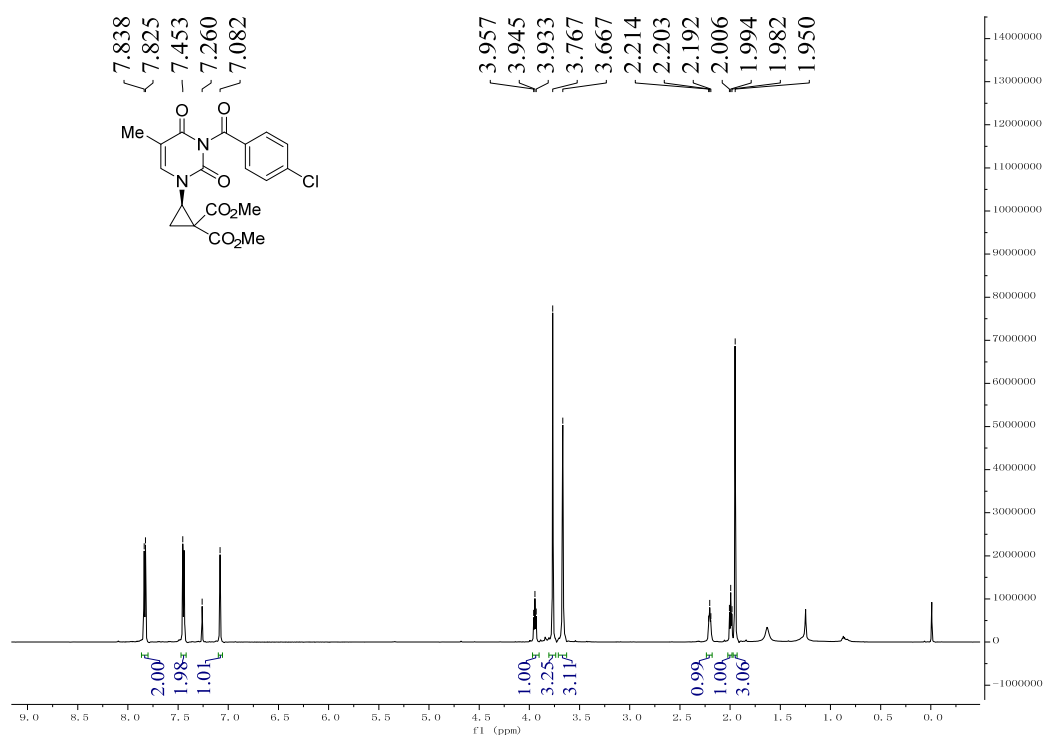

**<sup>13</sup>C NMR of 3ka (100 MHz, Chloroform-d)**

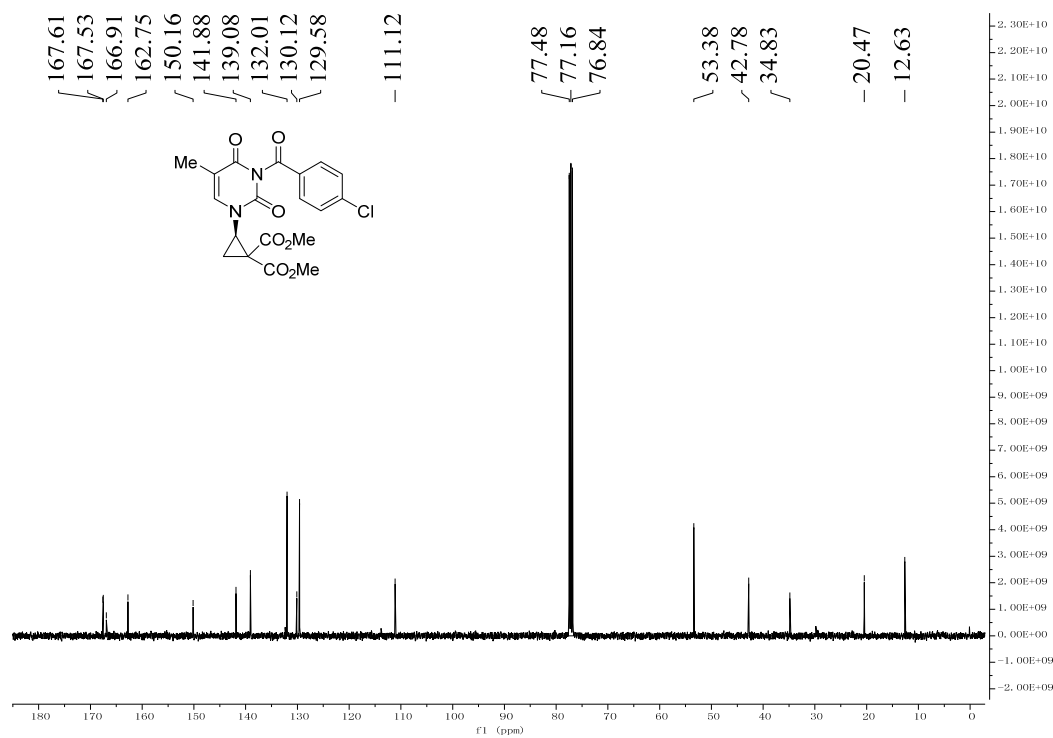

### <sup>1</sup>H NMR of 3a (600 MHz, Chloroform-*d*)

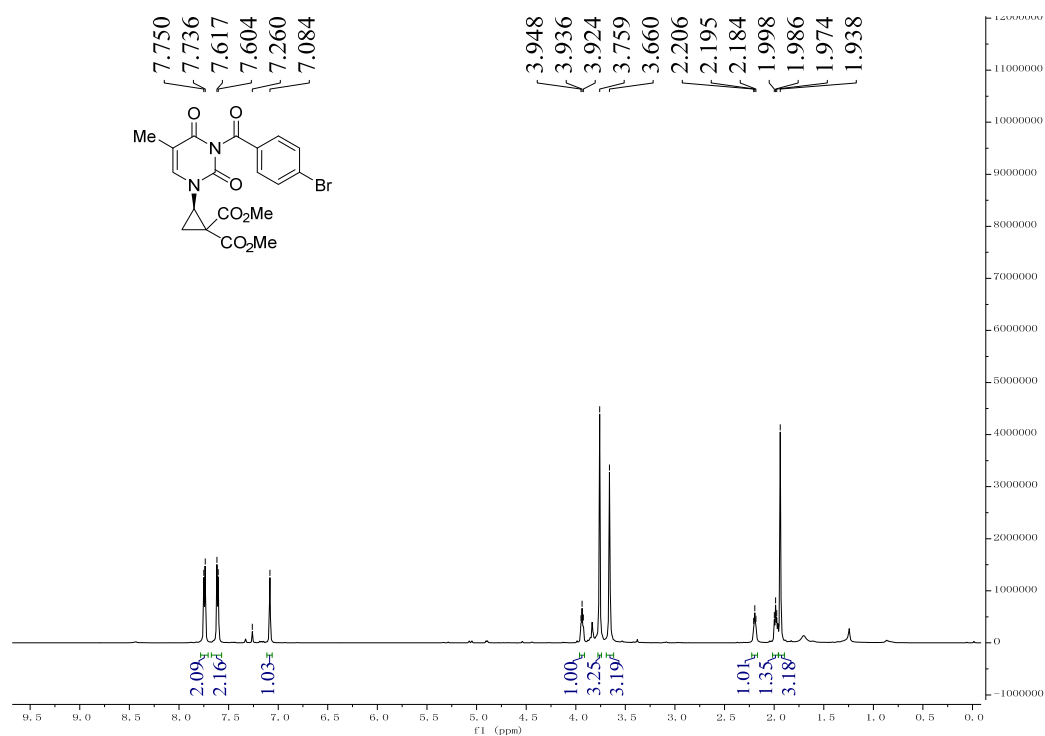

### <sup>13</sup>C NMR of 3a (150 MHz, Chloroform-*d*)

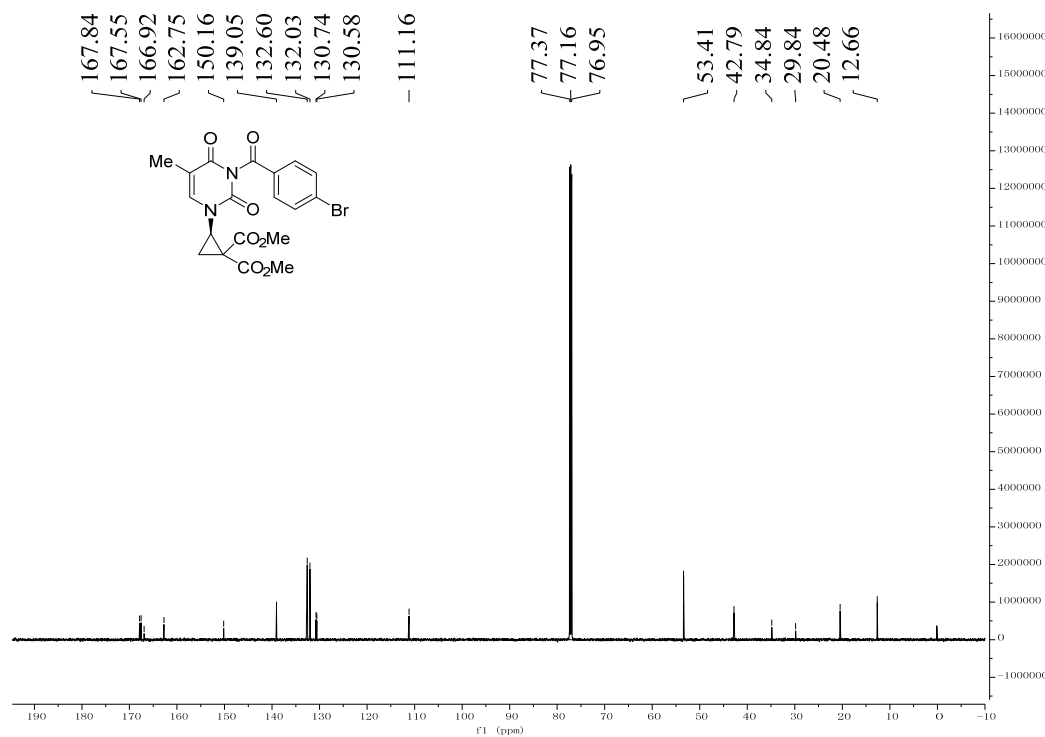

### <sup>1</sup>H NMR of 3ma (400 MHz, Chloroform-d)

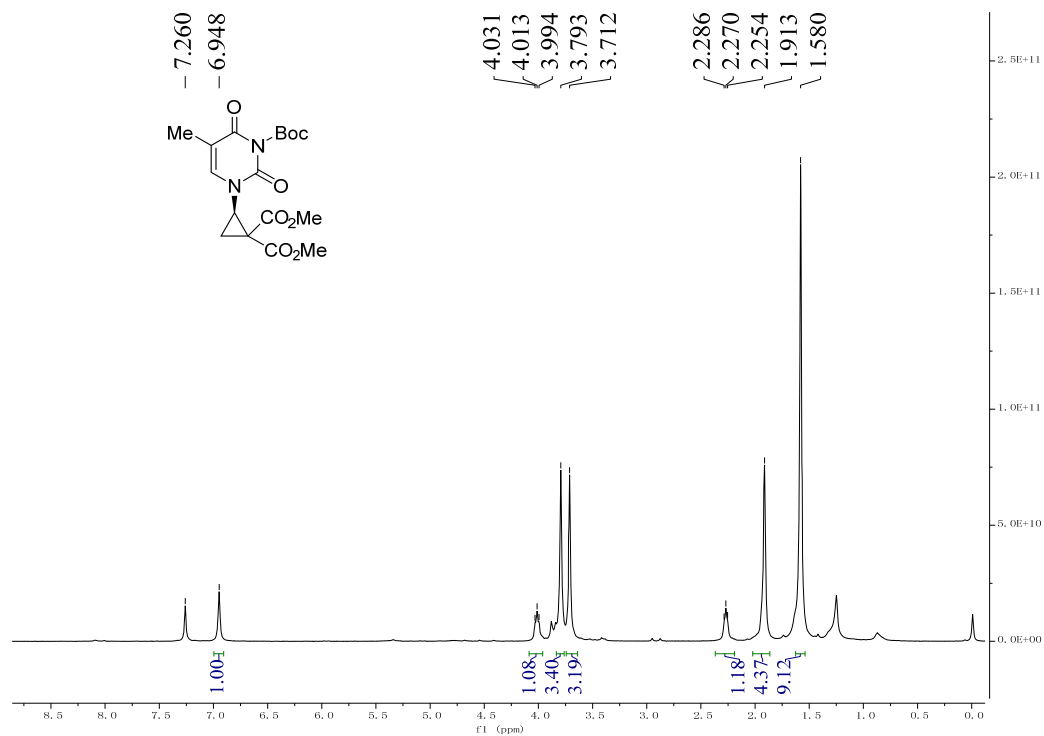

### <sup>13</sup>C NMR of 3ma (150 MHz, Chloroform-d)

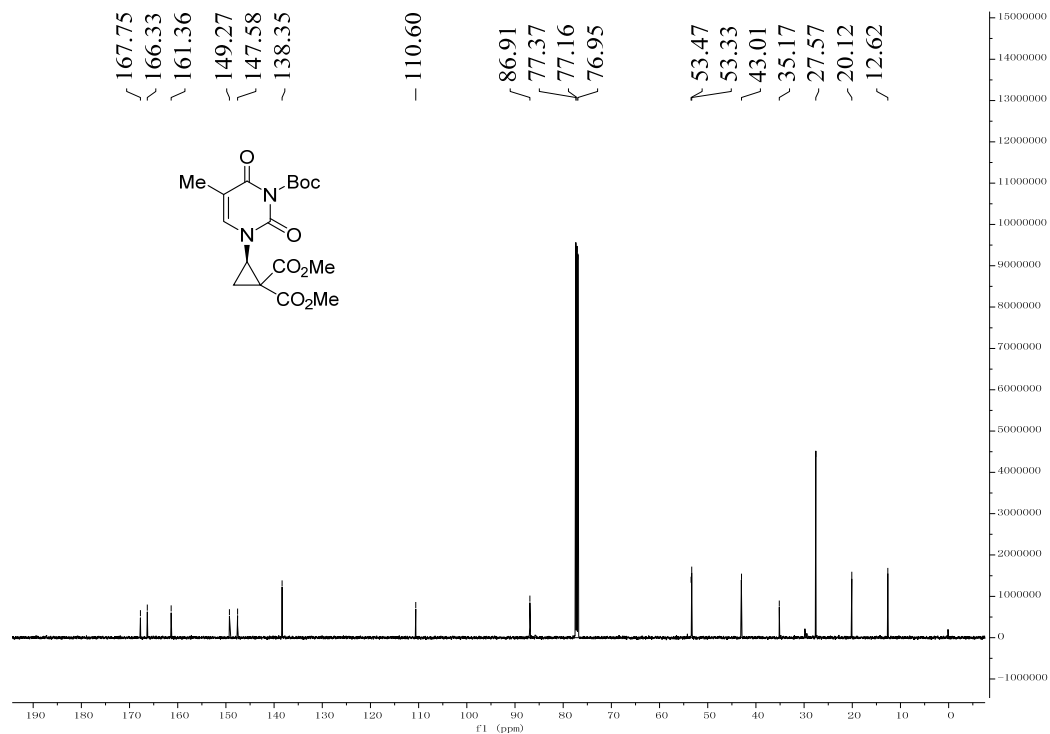

### <sup>1</sup>H NMR of 3ab (400 MHz, Chloroform-d)

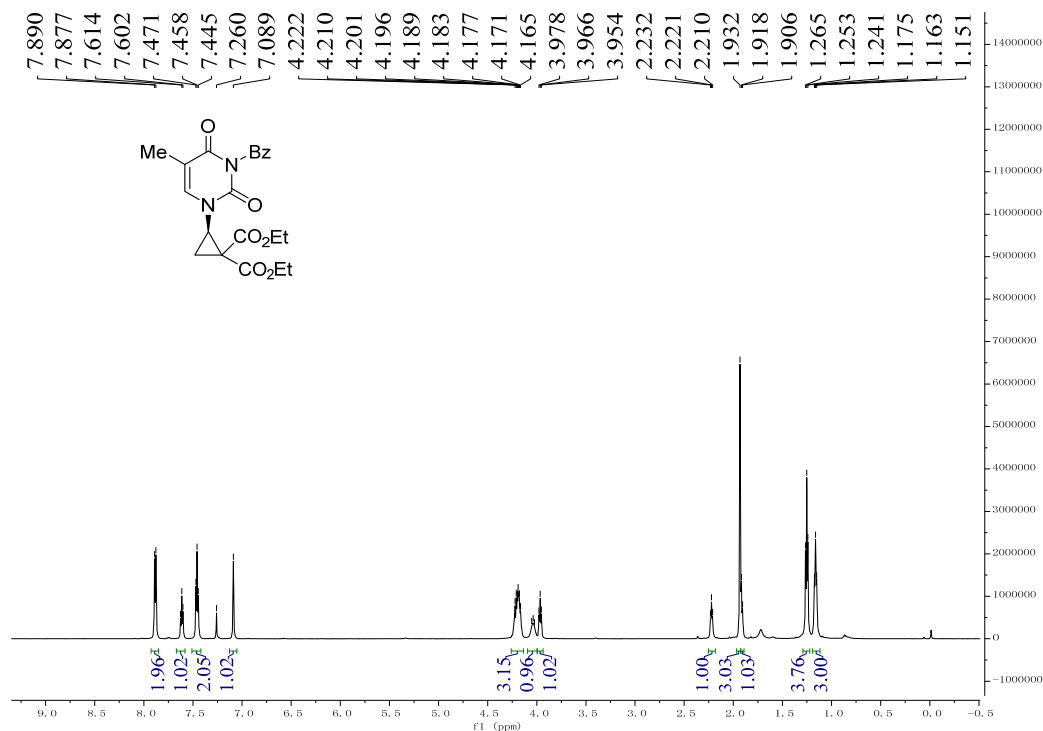

### <sup>13</sup>C NMR of 3ab (150 MHz, Chloroform-d)

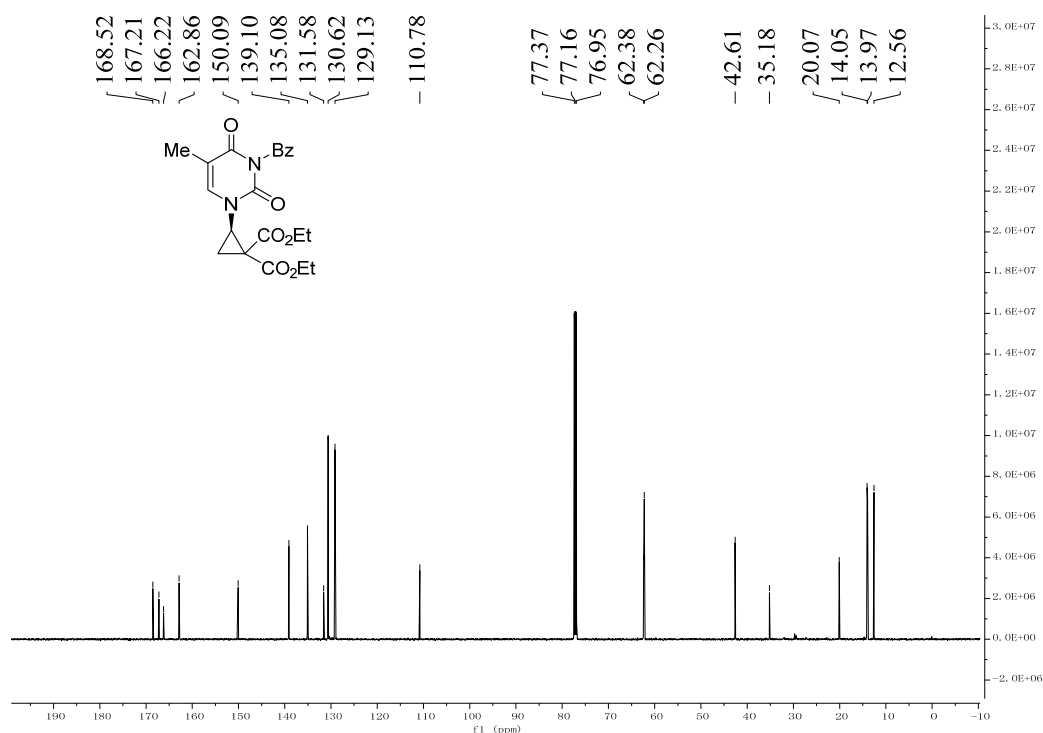

### <sup>1</sup>H NMR of 3na (400 MHz, Chloroform-*d*)

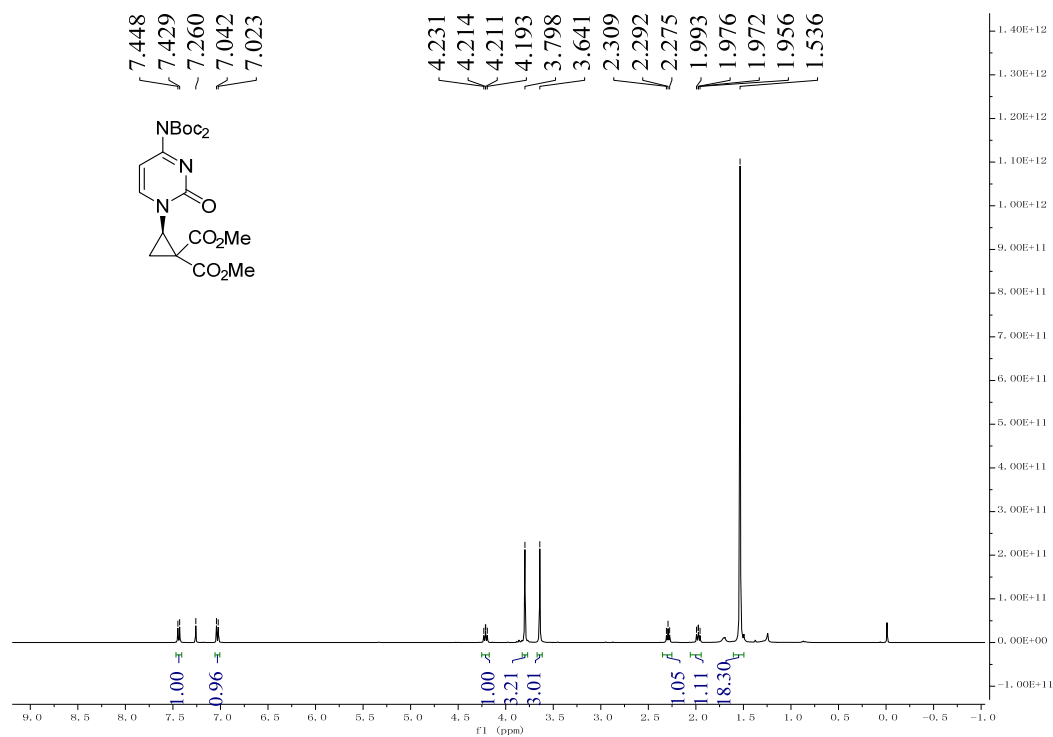

### <sup>13</sup>C NMR of 3na (100 MHz, Chloroform-*d*)

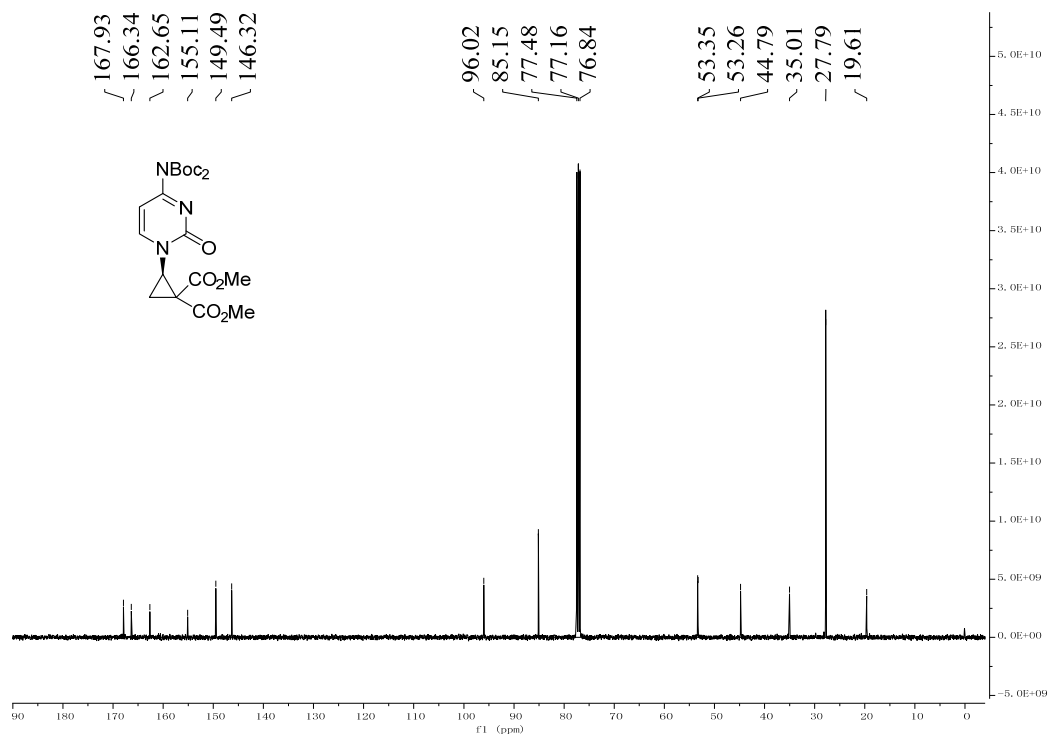

### <sup>1</sup>H NMR of 4ba (600 MHz, DMSO-d<sub>6</sub>)

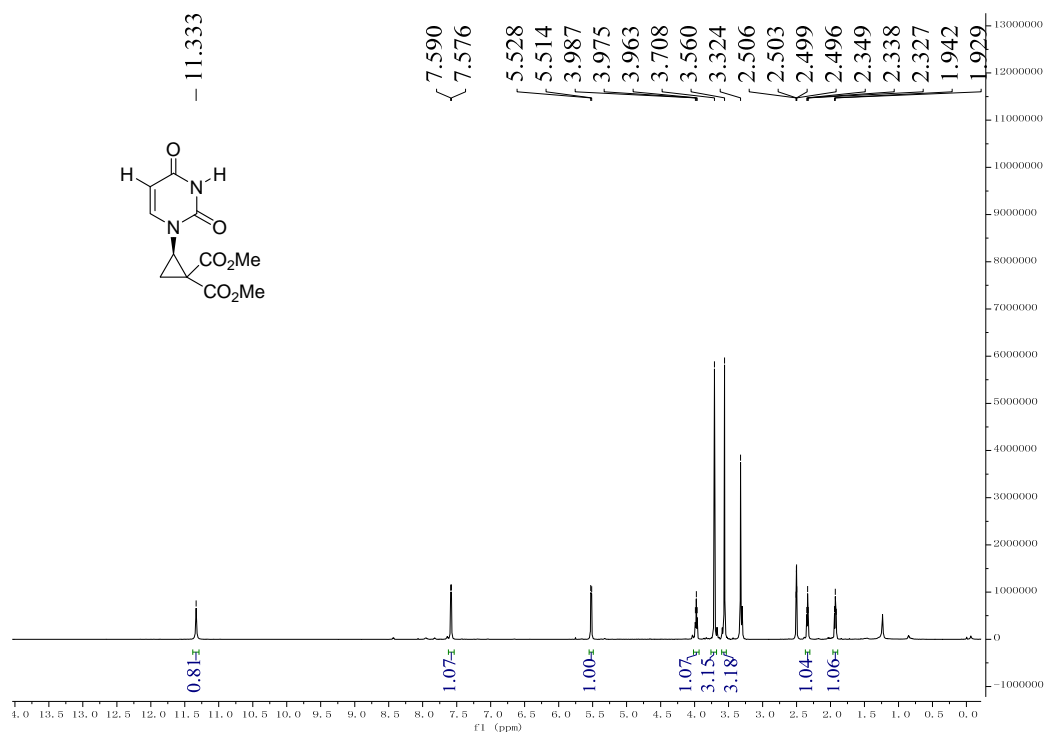

### <sup>13</sup>C NMR of 4ba (150 MHz, DMSO-d<sub>6</sub>)

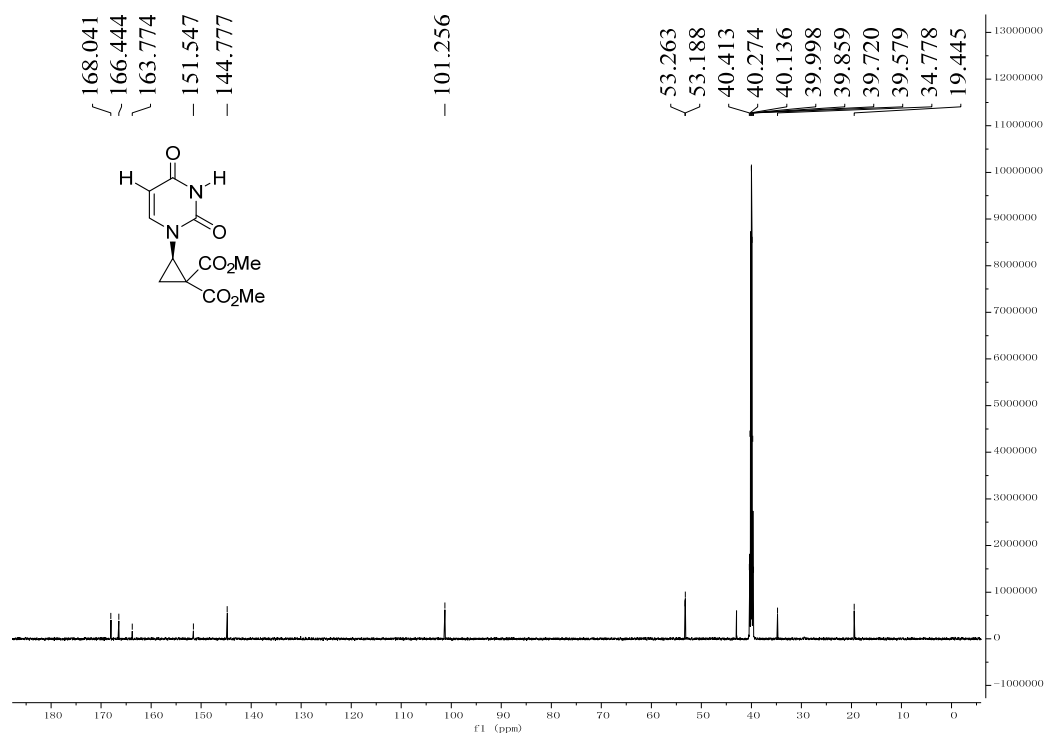

### <sup>1</sup>H NMR of 6aa (600 MHz, Chloroform-d)

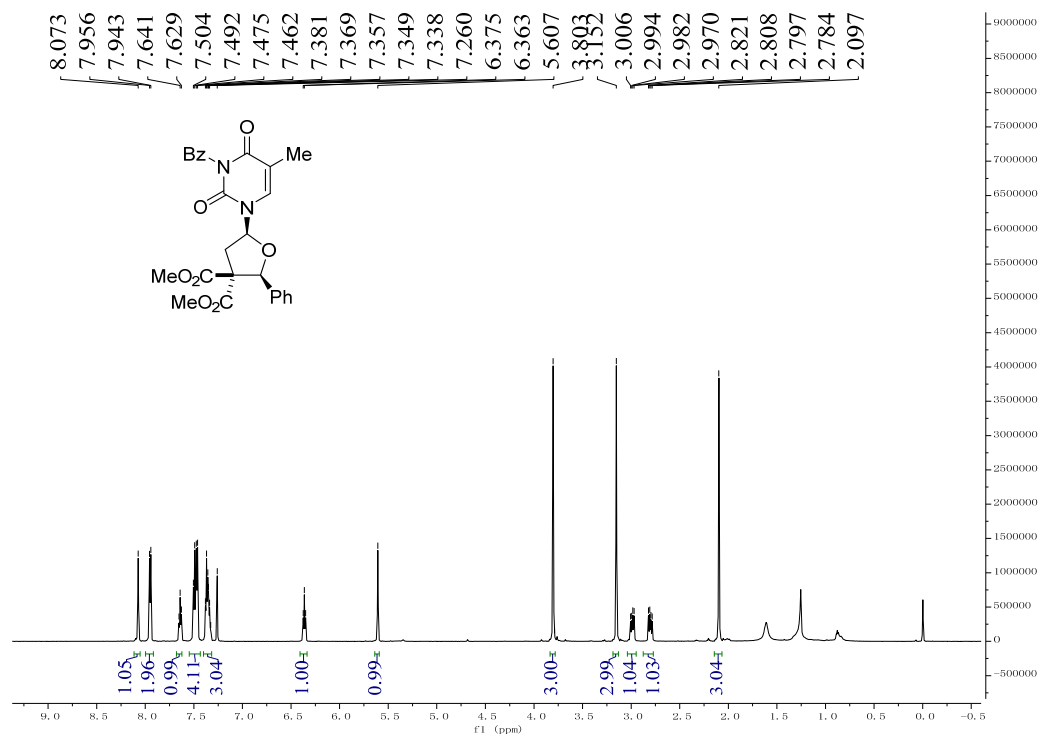

### <sup>13</sup>C NMR of 6aa (150 MHz, Chloroform-d)

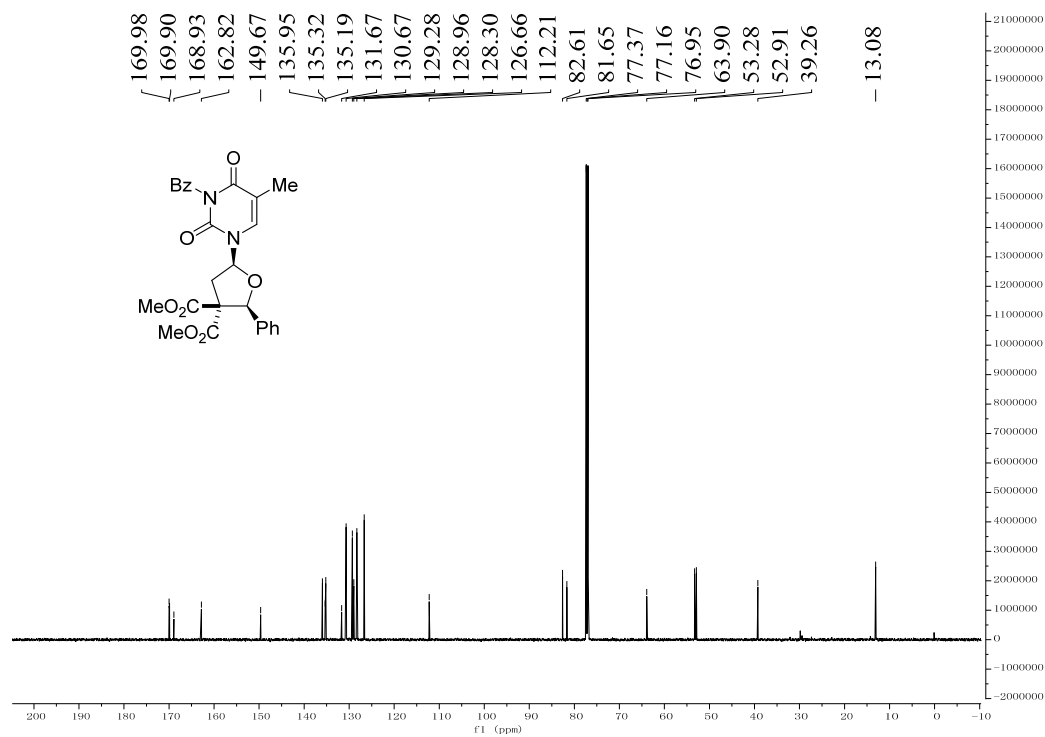

**<sup>1</sup>H NMR of 8aa (400 MHz, Chloroform-d)**

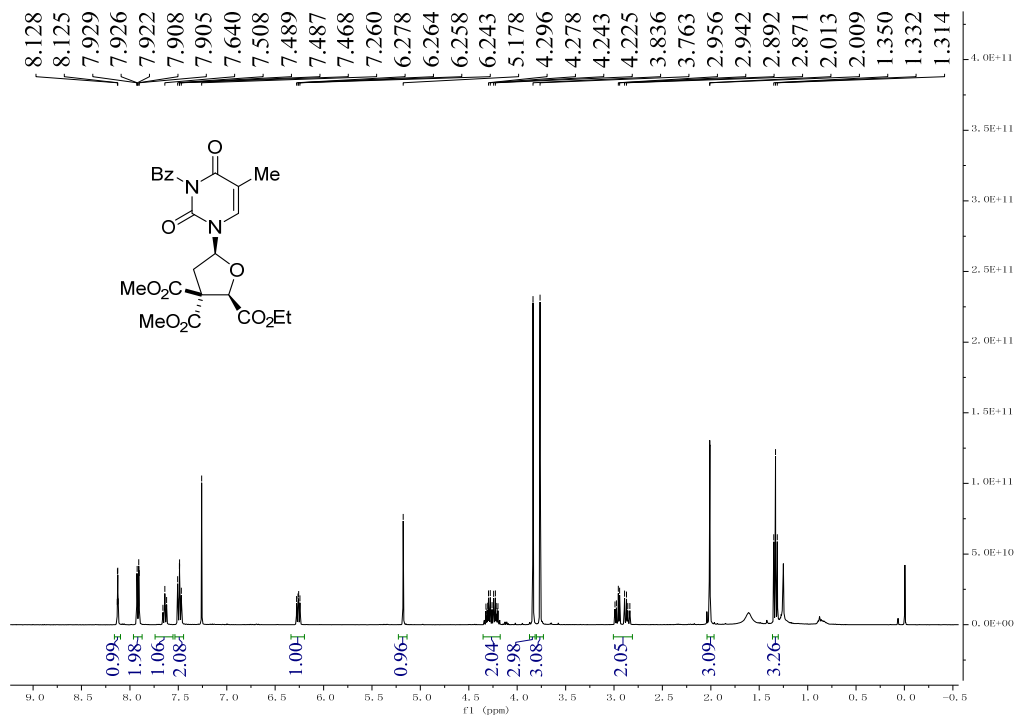

**<sup>13</sup>C NMR of 8aa (150 MHz, Chloroform-d)**

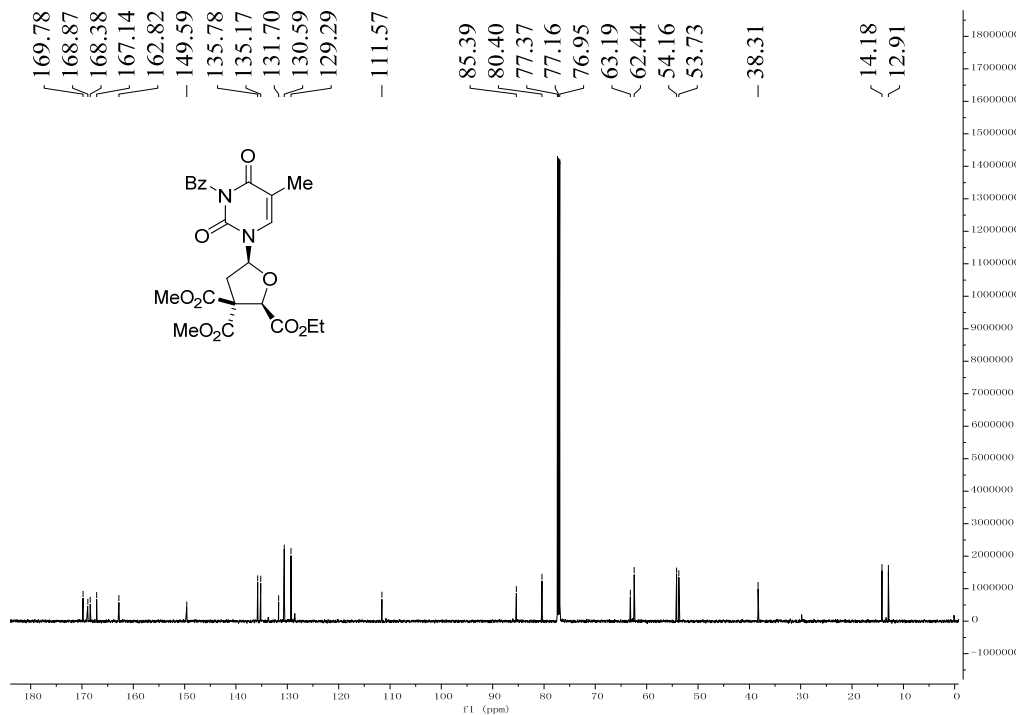



### <sup>1</sup>H NMR of 9aa (400 MHz, Chloroform-*d*)

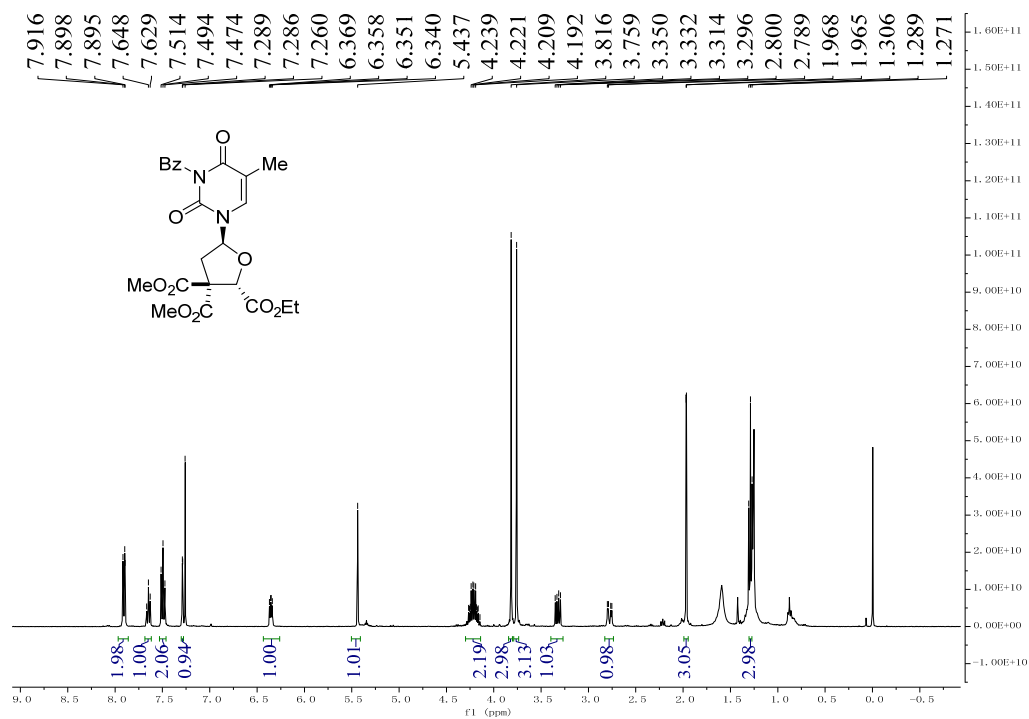

### <sup>13</sup>C NMR of 9aa (100 MHz, Chloroform-*d*)

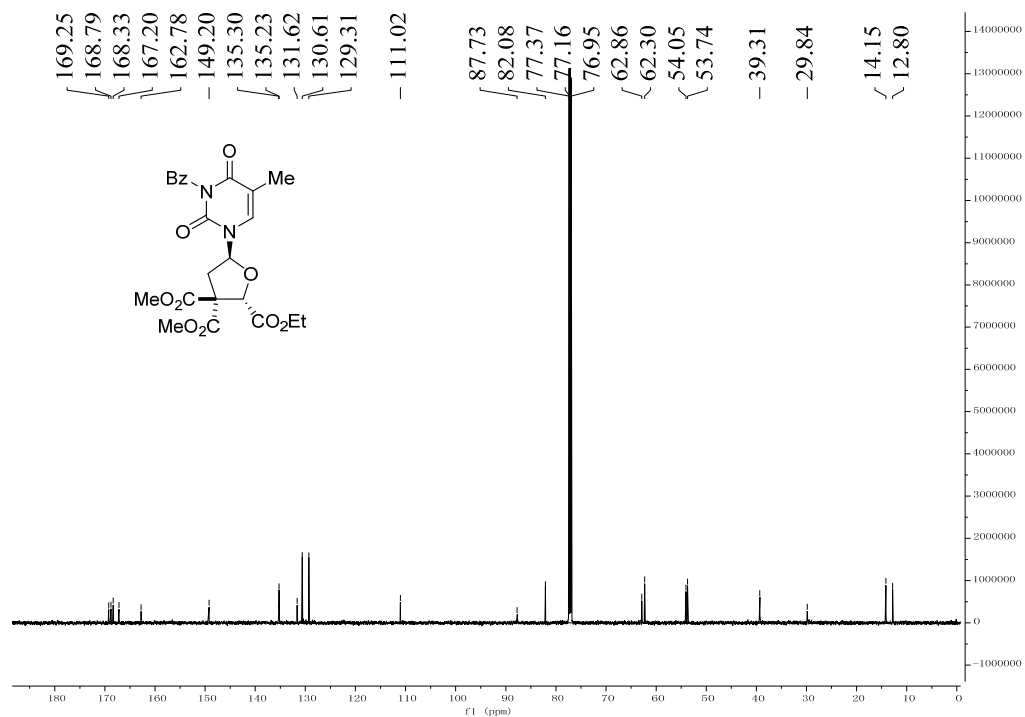

### <sup>1</sup>H NMR of 8ba (600 MHz, Chloroform-*d*)

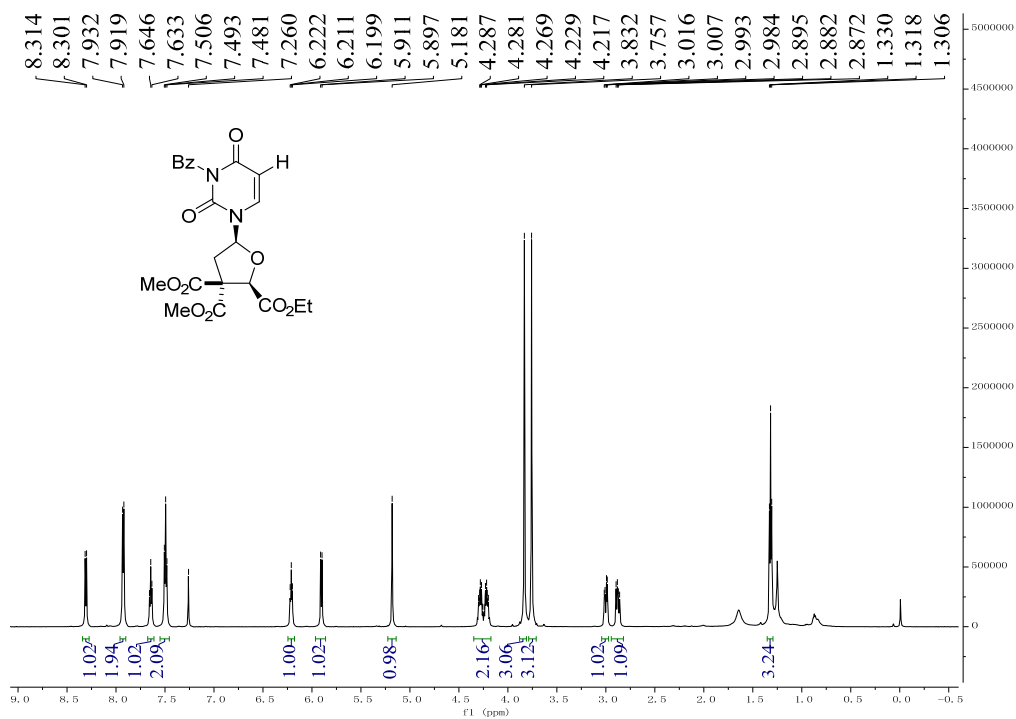

### <sup>13</sup>C NMR of 8ba (600 MHz, Chloroform-*d*)

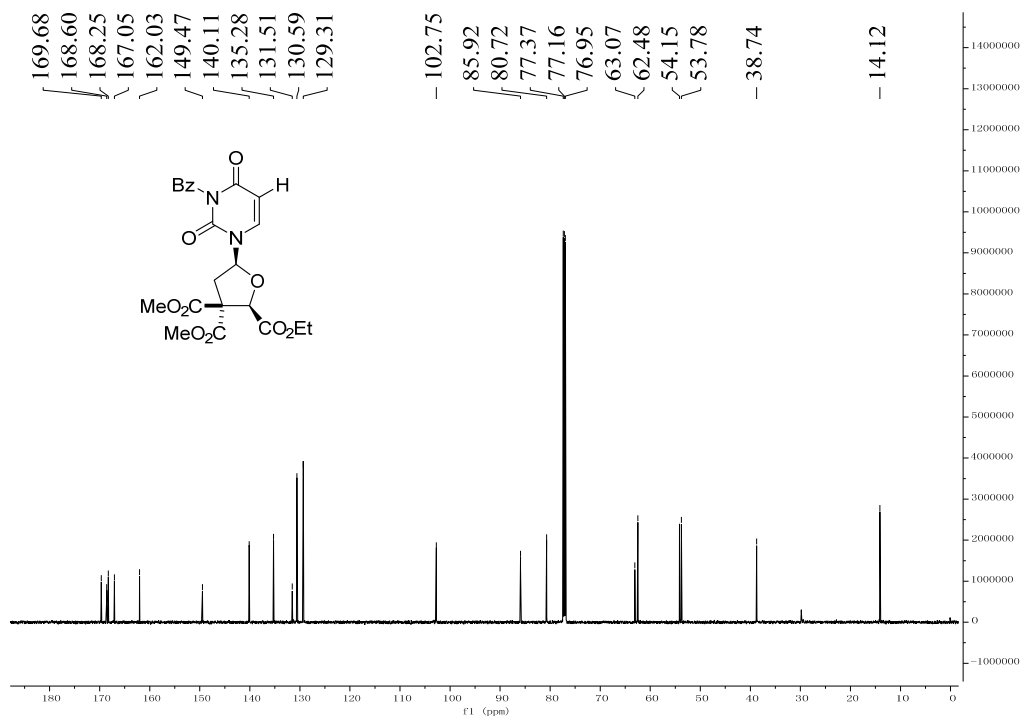

### <sup>1</sup>H NMR of 9ba (600 MHz, Chloroform-d)

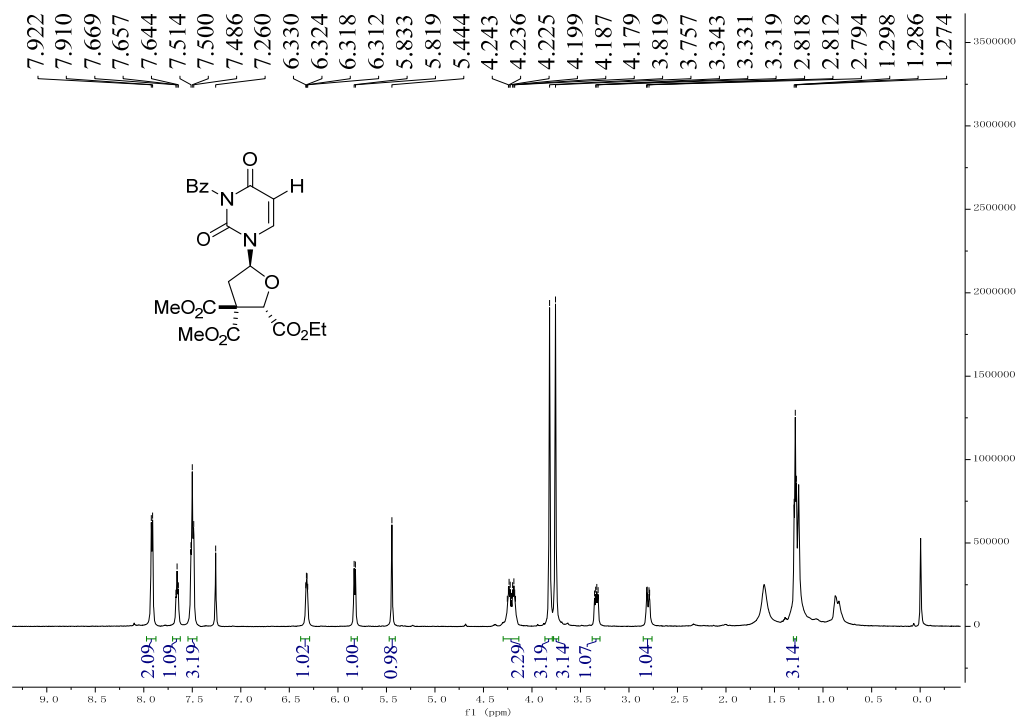

### <sup>13</sup>C NMR of 9ba (600 MHz, Chloroform-d)

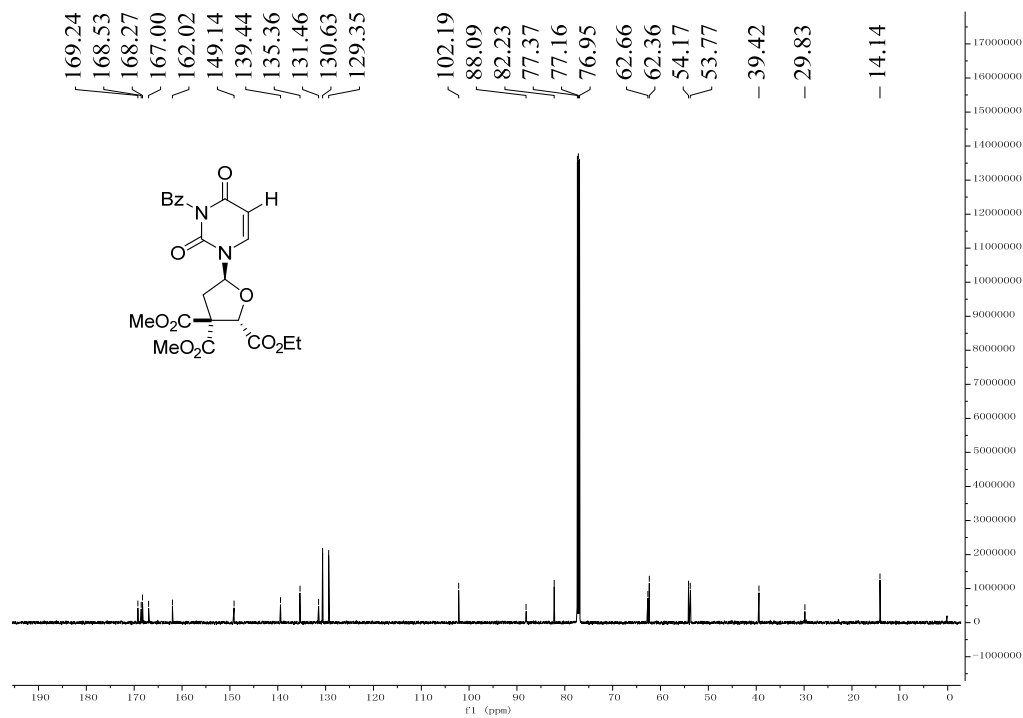

NOESY of **6aa**

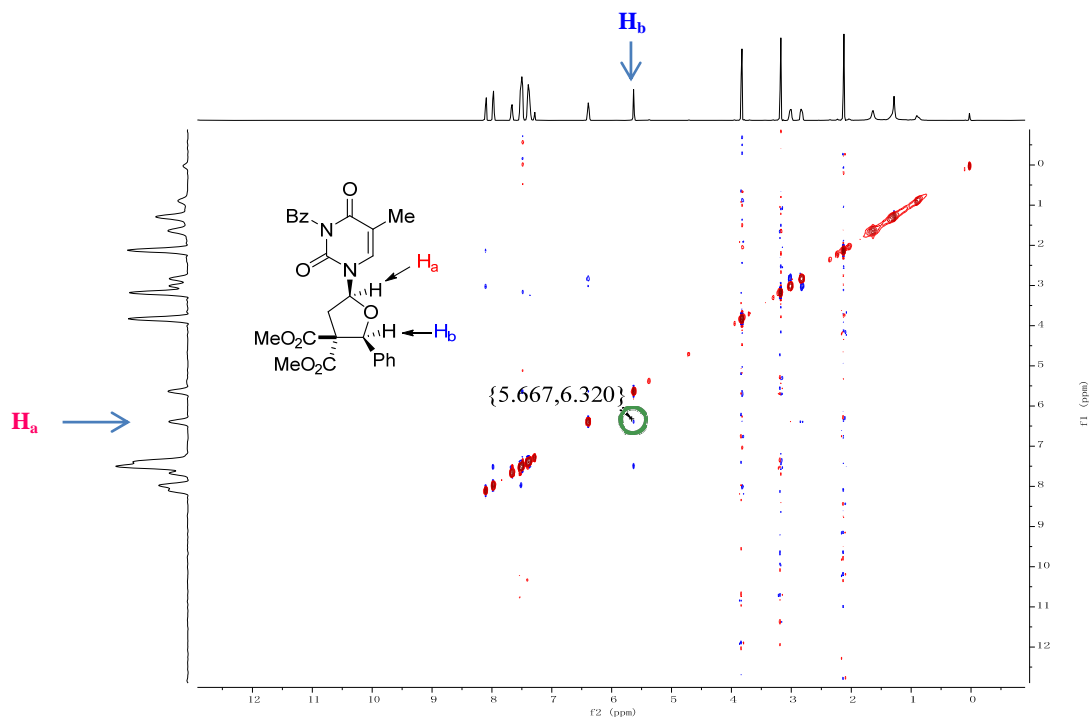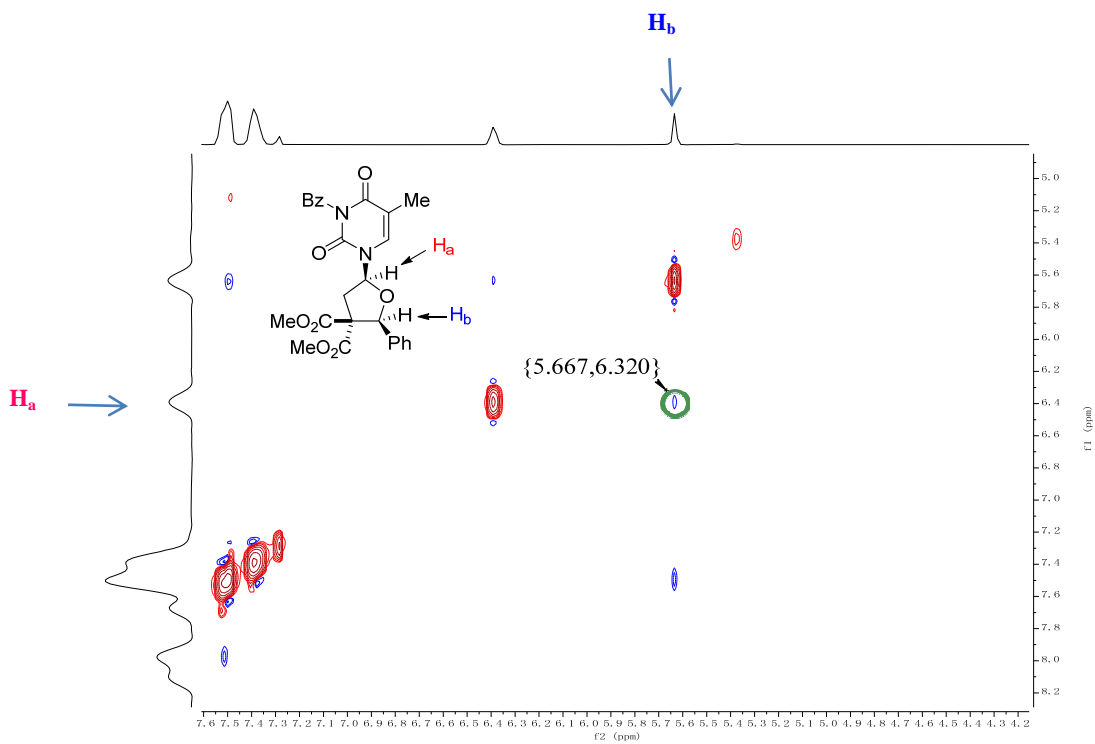

NOESY of **8aa**

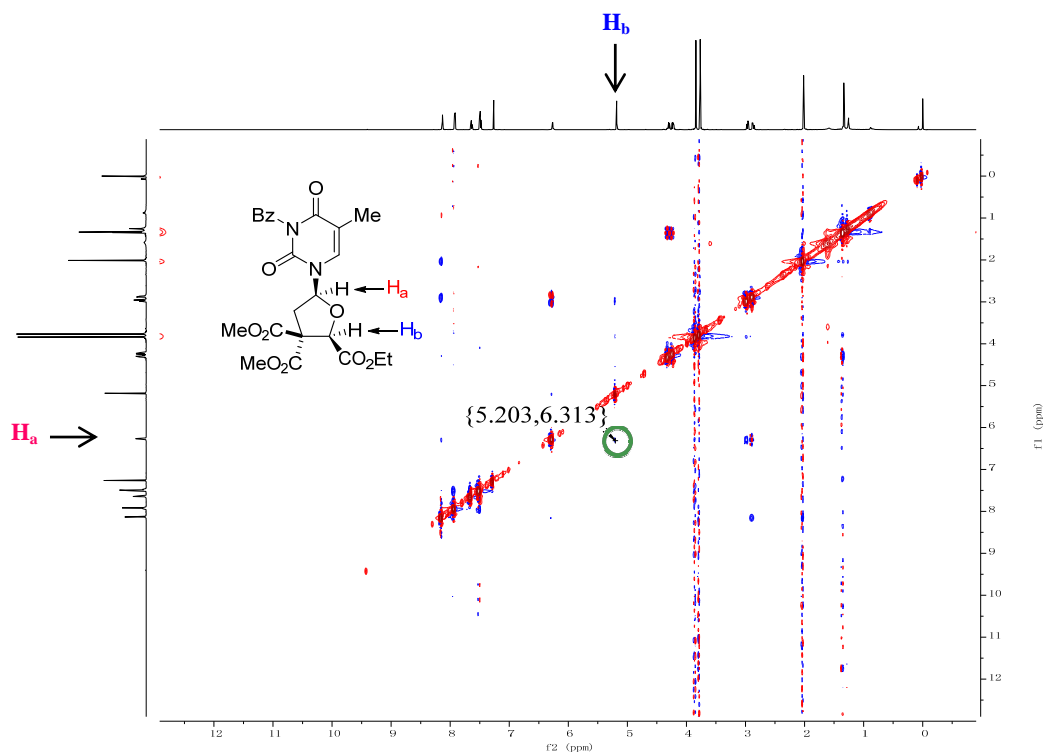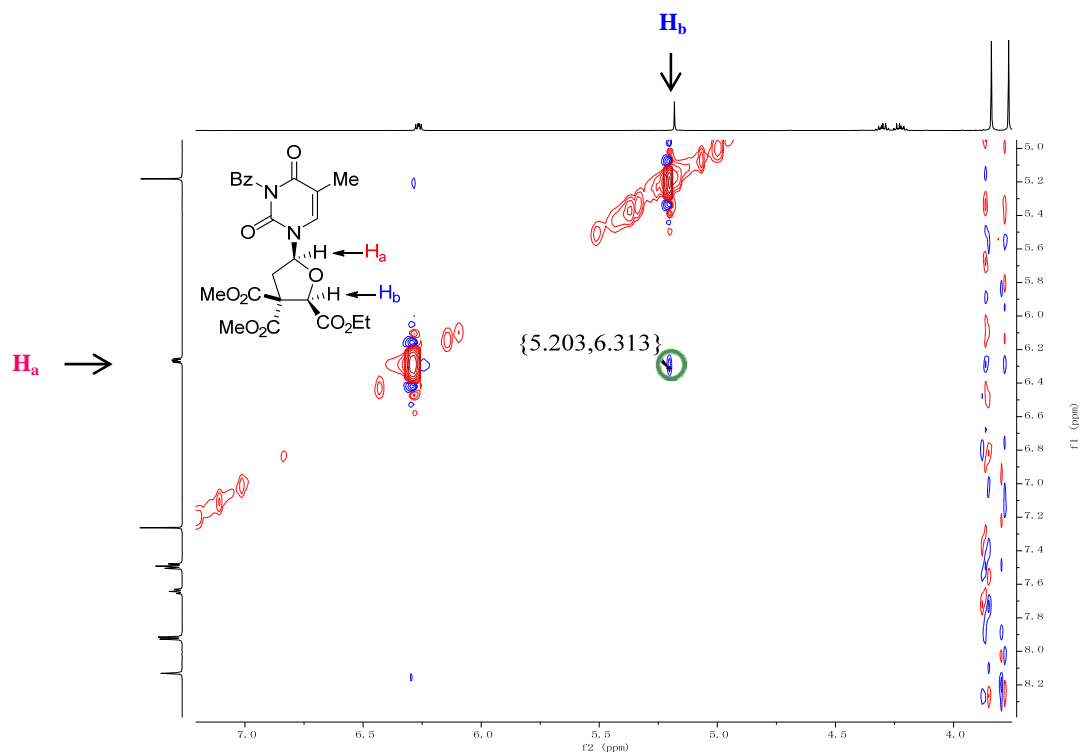

NOESY of **9aa**

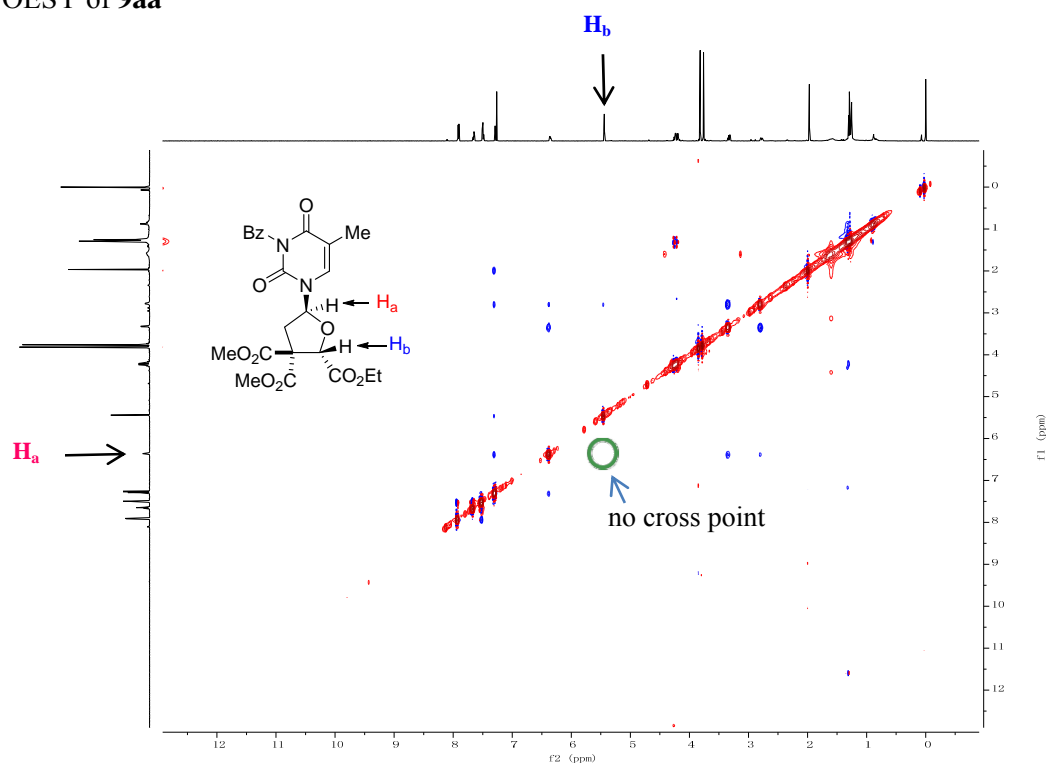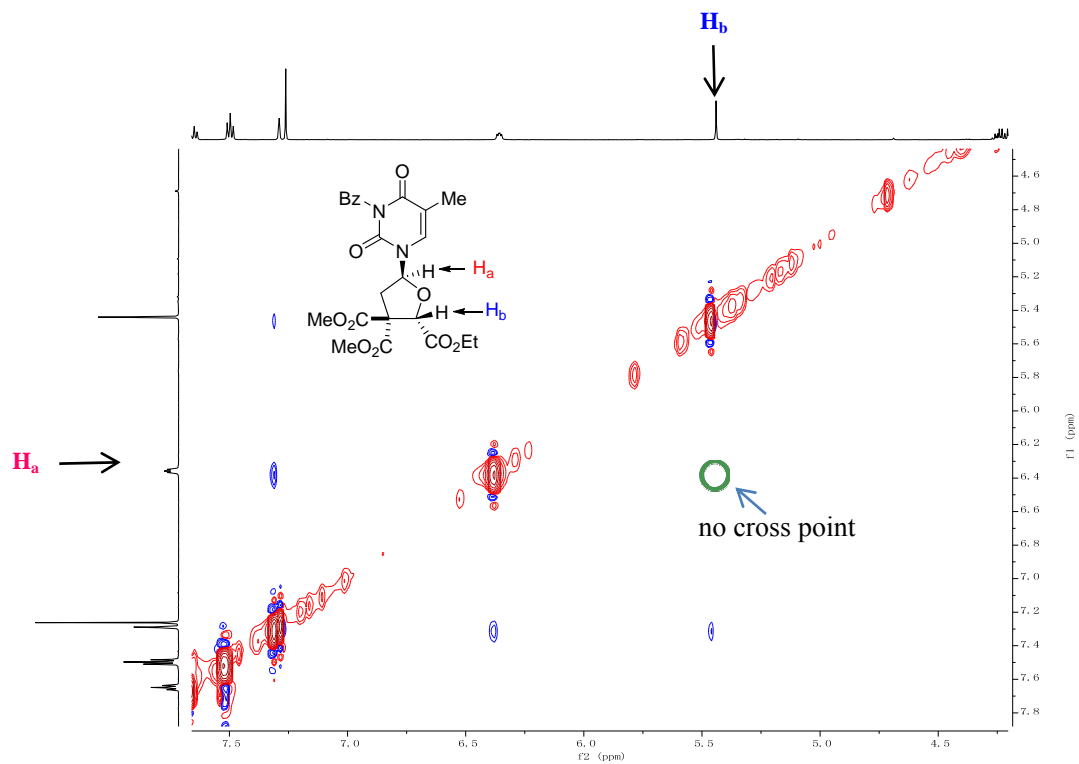

NOESY of **8ba**

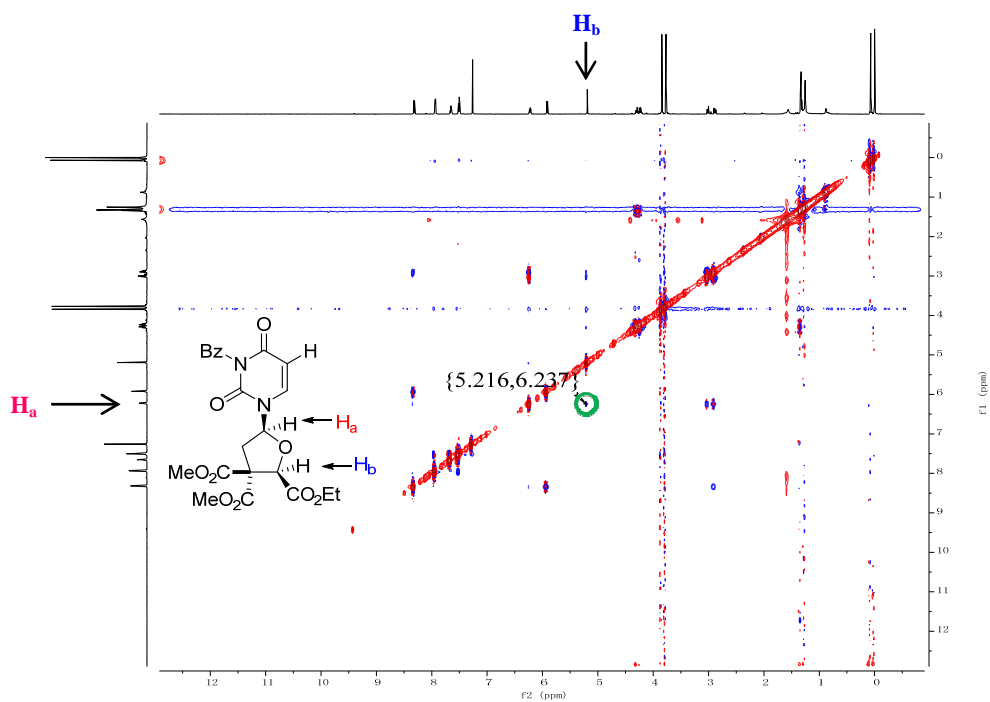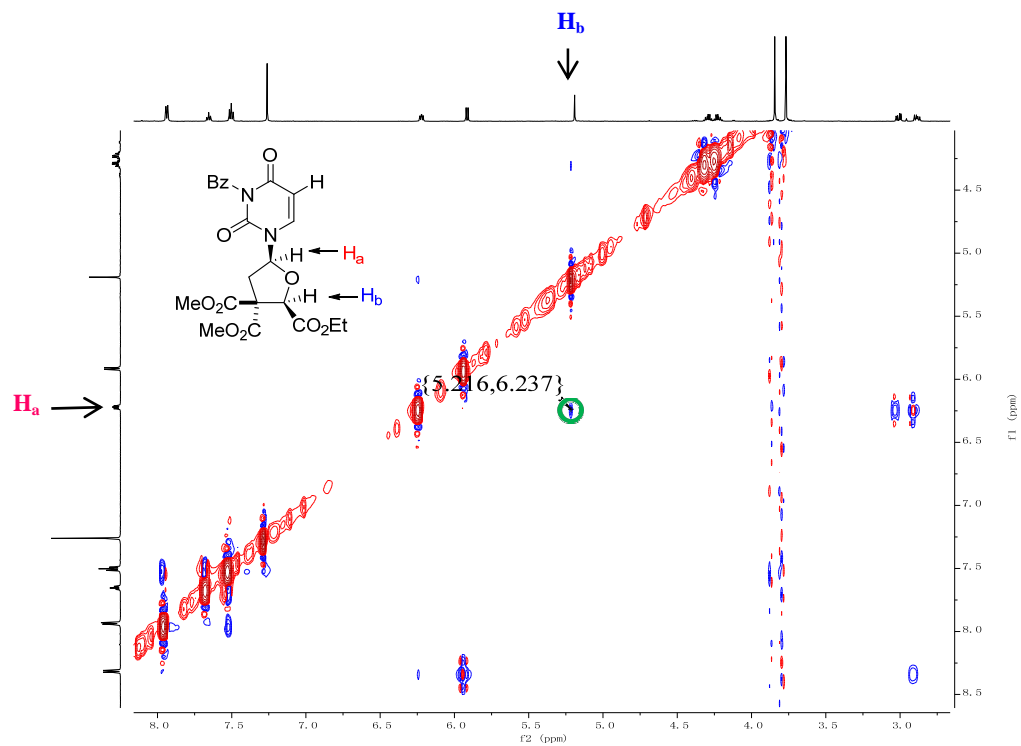

NOESY of **9ba**

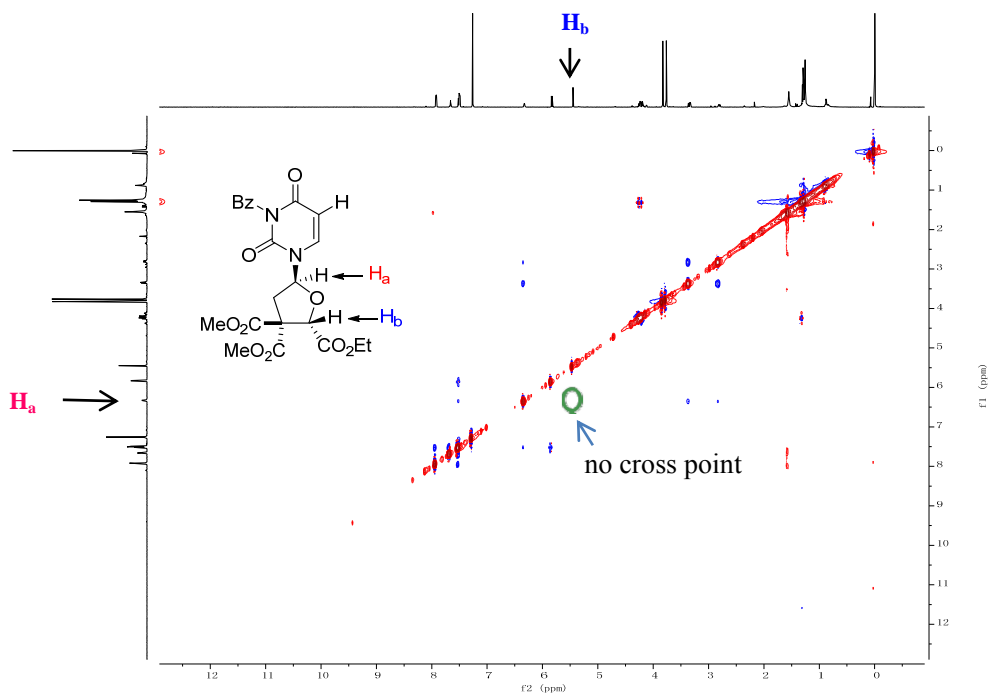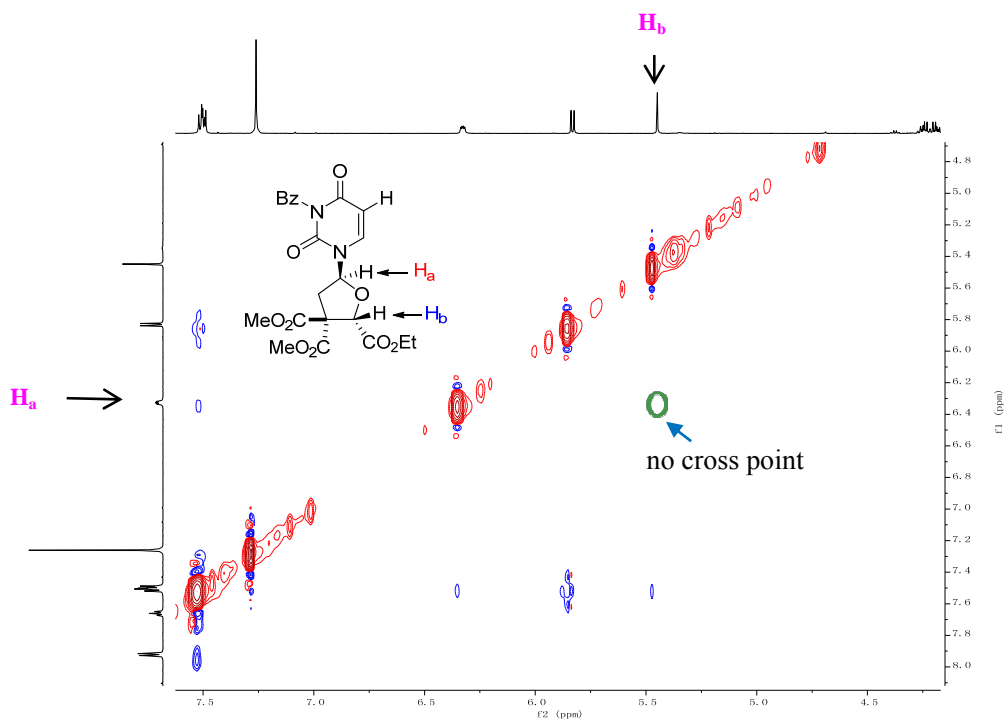



## 12. Copies of HPLC spectra for racemic and chiral compounds

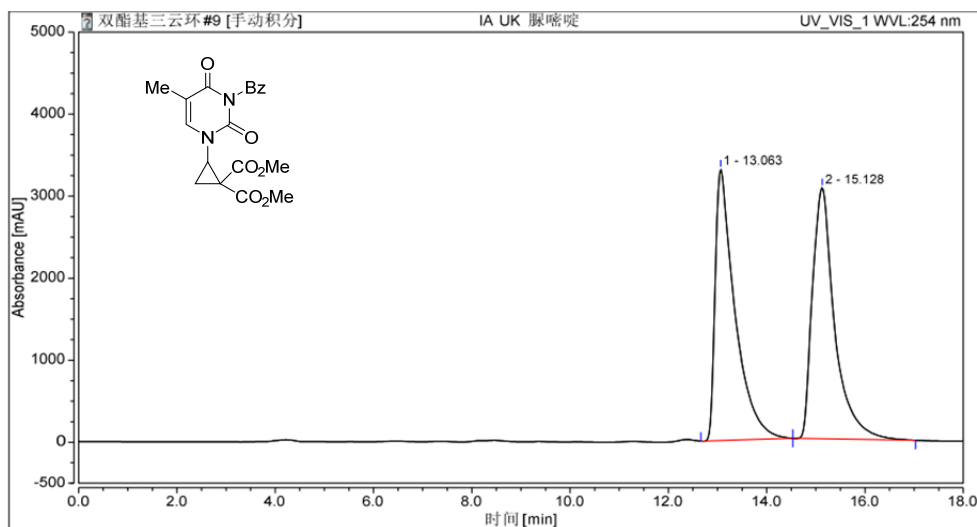

| Peak          | Retention Time<br>min | Area<br>mAU*min | Height<br>mAU   | Area<br>%     |
|---------------|-----------------------|-----------------|-----------------|---------------|
| 1             | 13.063                | 1538.139        | 3311.123        | 49.02         |
| 2             | 15.128                | 1599.614        | 3062.570        | 50.98         |
| <b>Total:</b> |                       | <b>3137.753</b> | <b>6373.693</b> | <b>100.00</b> |

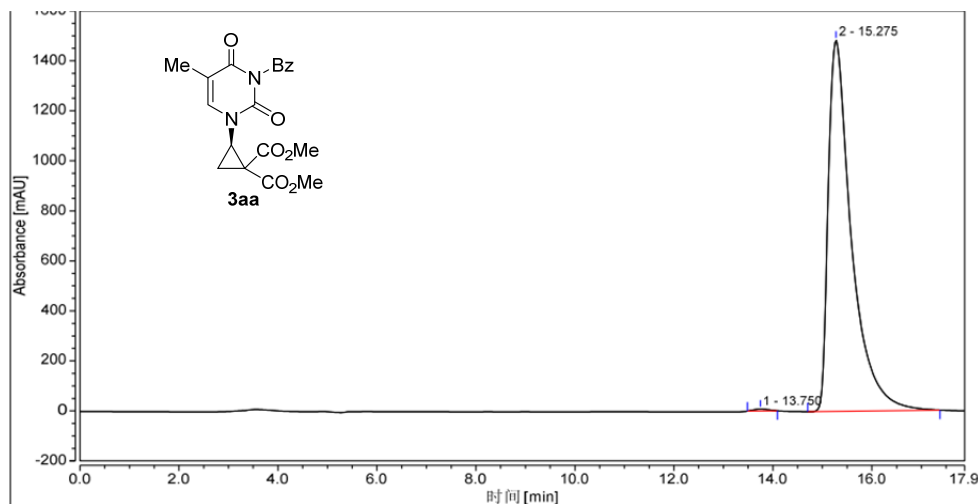

| Peak          | Retention Time<br>min | Area<br>mAU*min | Height<br>mAU   | Area<br>%     |
|---------------|-----------------------|-----------------|-----------------|---------------|
| 1             | 13.750                | 2.708           | 7.688           | 0.33          |
| 2             | 15.275                | 806.982         | 1484.395        | 99.67         |
| <b>Total:</b> |                       | <b>809.690</b>  | <b>1492.083</b> | <b>100.00</b> |

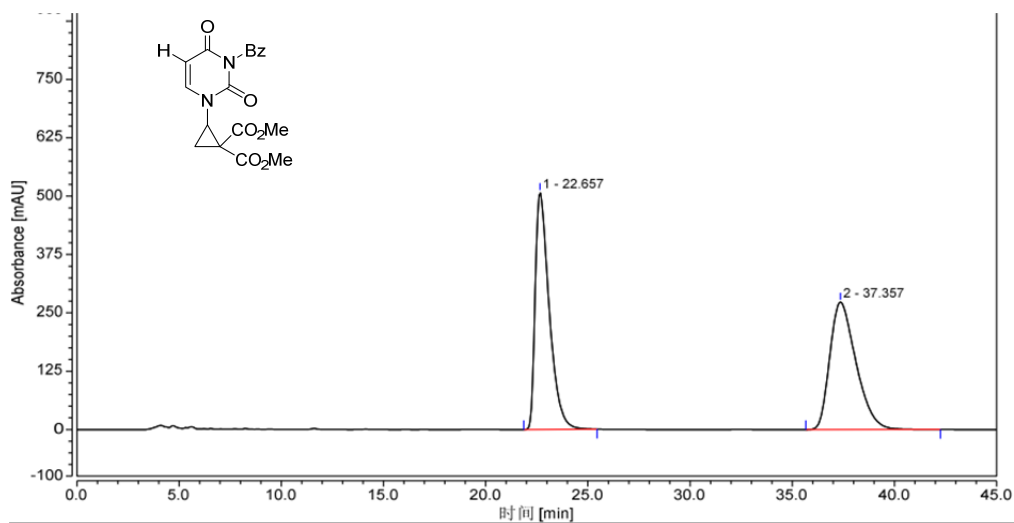

| 积分结果          |                       |                 |                |               |               |
|---------------|-----------------------|-----------------|----------------|---------------|---------------|
| Peak          | Retention Time<br>min | Area<br>mAU*min | Height<br>mAU  | Area<br>%     | Height<br>%   |
| 1             | 22.657                | 403.819         | 507.838        | 49.92         | 65.02         |
| 2             | 37.357                | 405.114         | 273.249        | 50.08         | 34.98         |
| <b>Total:</b> |                       | <b>808.932</b>  | <b>781.087</b> | <b>100.00</b> | <b>100.00</b> |

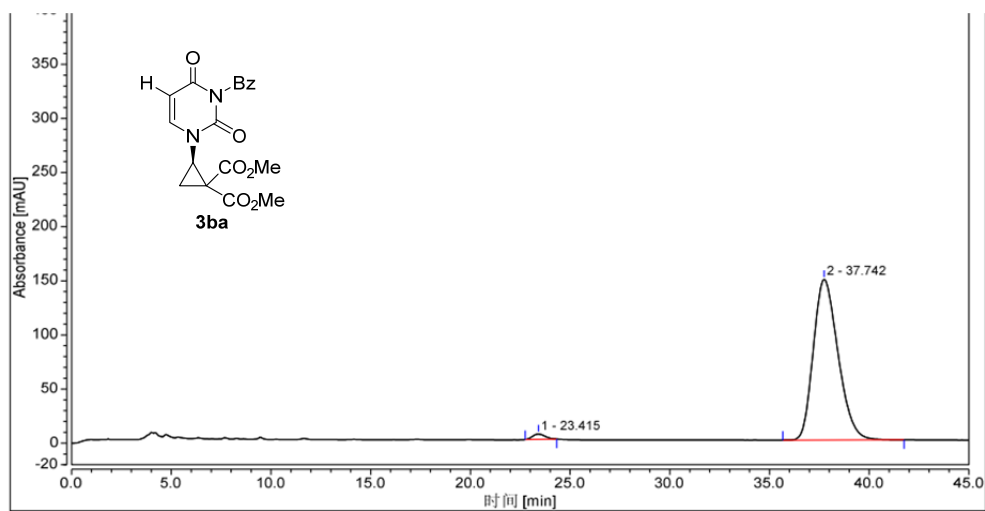

| 积分结果          |                       |                 |                |               |               |
|---------------|-----------------------|-----------------|----------------|---------------|---------------|
| Peak          | Retention Time<br>min | Area<br>mAU*min | Height<br>mAU  | Area<br>%     | Height<br>%   |
| 1             | 23.415                | 3.620           | 4.975          | 1.67          | 3.24          |
| 2             | 37.742                | 213.360         | 148.461        | 98.33         | 96.76         |
| <b>Total:</b> |                       | <b>216.980</b>  | <b>153.436</b> | <b>100.00</b> | <b>100.00</b> |

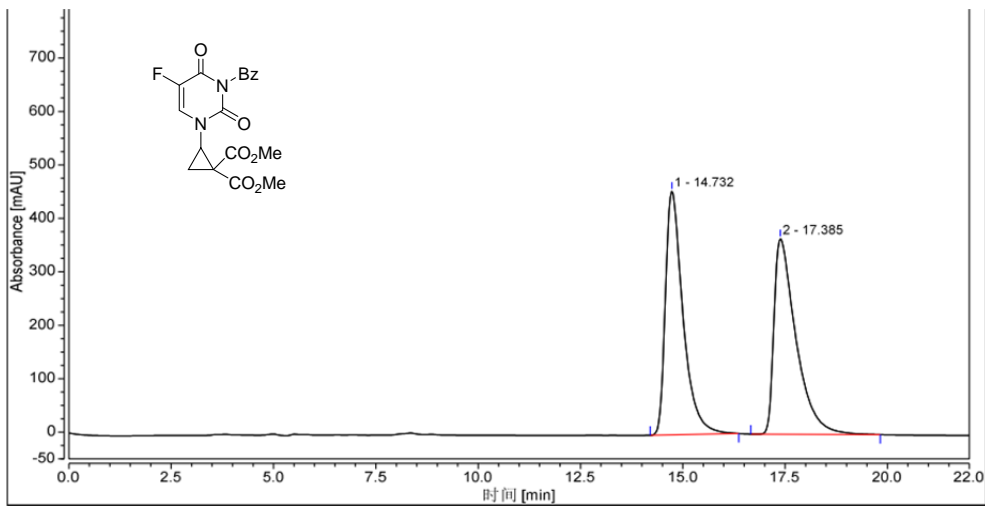

**积分结果**

| Peak          | Retention Time<br>min | Area<br>mAU*min | Height<br>mAU  | Area<br>%     | Height<br>%   |
|---------------|-----------------------|-----------------|----------------|---------------|---------------|
| 1             | 14.732                | 227.516         | 455.937        | 49.94         | 55.49         |
| 2             | 17.385                | 228.075         | 365.747        | 50.06         | 44.51         |
| <b>Total:</b> |                       | <b>455.591</b>  | <b>821.684</b> | <b>100.00</b> | <b>100.00</b> |

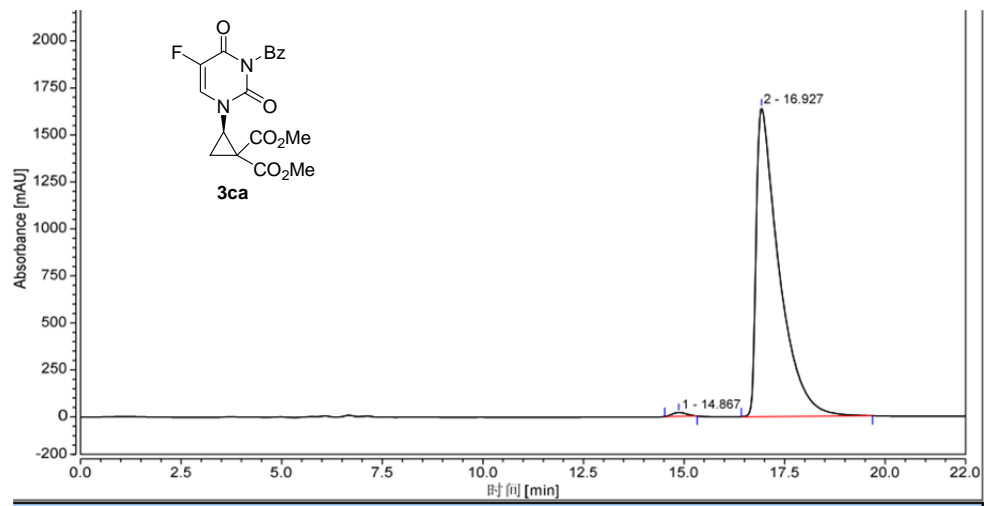

**积分结果**

| Peak          | Retention Time<br>min | Area<br>mAU*min | Height<br>mAU   | Area<br>%     | Height<br>%   |
|---------------|-----------------------|-----------------|-----------------|---------------|---------------|
| 1             | 14.867                | 8.577           | 20.380          | 0.79          | 1.23          |
| 2             | 16.927                | 1075.603        | 1641.785        | 99.21         | 98.77         |
| <b>Total:</b> |                       | <b>1084.180</b> | <b>1662.164</b> | <b>100.00</b> | <b>100.00</b> |

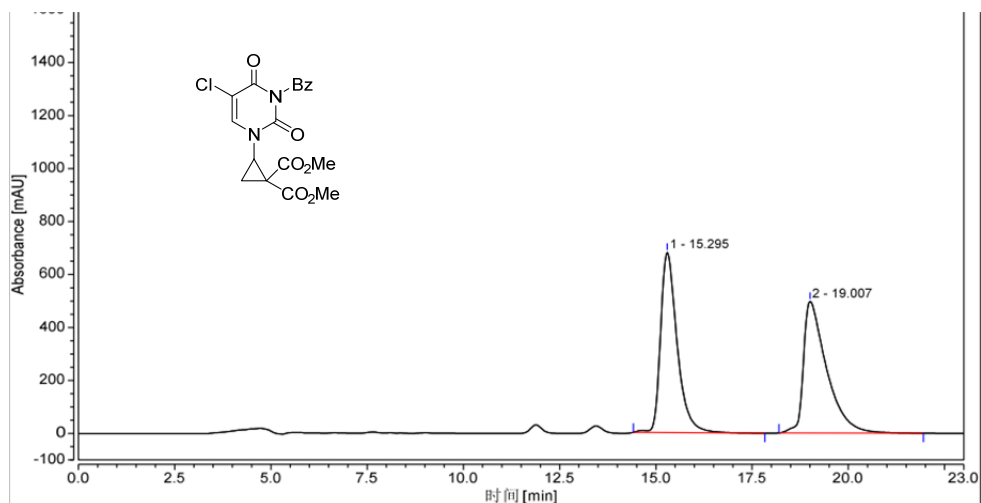

### 积分结果

| Peak          | Retention Time<br>min | Area<br>mAU*min | Height<br>mAU   | Area<br>%     | Height<br>%   |
|---------------|-----------------------|-----------------|-----------------|---------------|---------------|
| 1             | 15.295                | 340.219         | 680.348         | 49.53         | 57.80         |
| 2             | 19.007                | 346.741         | 496.755         | 50.47         | 42.20         |
| <b>Total:</b> |                       | <b>686.960</b>  | <b>1177.103</b> | <b>100.00</b> | <b>100.00</b> |

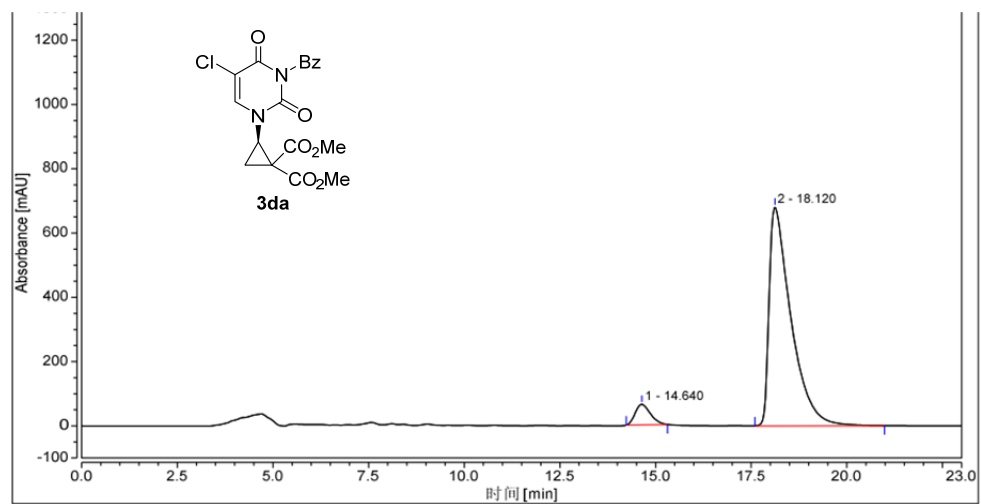

### 积分结果

| Peak          | Retention Time<br>min | Area<br>mAU*min | Height<br>mAU  | Area<br>%     | Height<br>%   |
|---------------|-----------------------|-----------------|----------------|---------------|---------------|
| 1             | 14.640                | 29.337          | 63.997         | 6.11          | 8.59          |
| 2             | 18.120                | 450.433         | 680.842        | 93.89         | 91.41         |
| <b>Total:</b> |                       | <b>479.770</b>  | <b>744.839</b> | <b>100.00</b> | <b>100.00</b> |

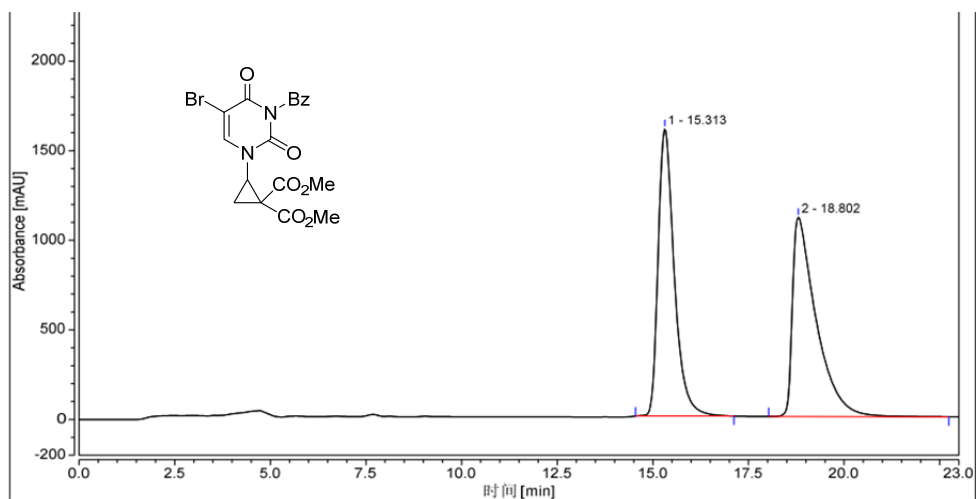

**积分结果**

| Peak          | Retention Time min | Area mAU*min    | Height mAU      | Area %        | Height %      |
|---------------|--------------------|-----------------|-----------------|---------------|---------------|
| 1             | 15.313             | 786.183         | 1604.487        | 49.64         | 59.05         |
| 2             | 18.802             | 797.450         | 1112.725        | 50.36         | 40.95         |
| <b>Total:</b> |                    | <b>1583.633</b> | <b>2717.212</b> | <b>100.00</b> | <b>100.00</b> |

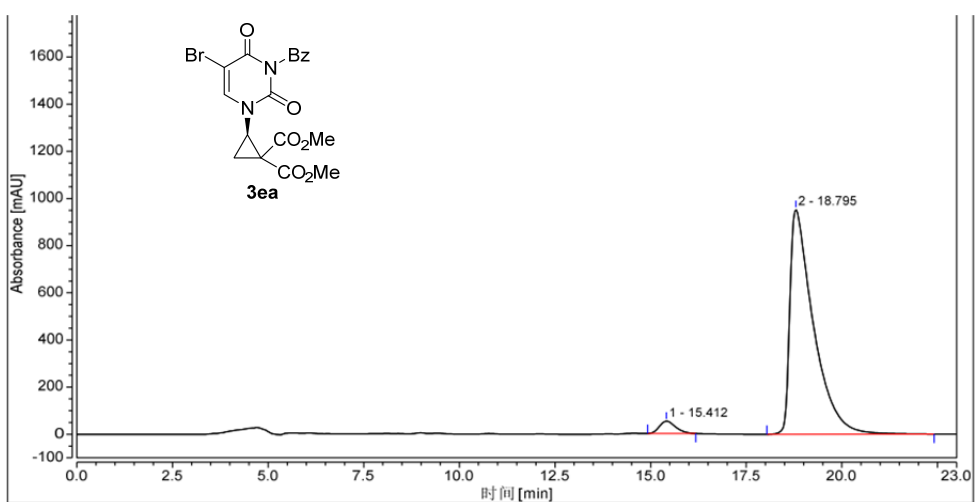

**积分结果**

| Peak          | Retention Time min | Area mAU*min   | Height mAU      | Area %        | Height %      |
|---------------|--------------------|----------------|-----------------|---------------|---------------|
| 1             | 15.412             | 25.465         | 51.939          | 3.62          | 5.17          |
| 2             | 18.795             | 678.847        | 952.853         | 96.38         | 94.83         |
| <b>Total:</b> |                    | <b>704.313</b> | <b>1004.792</b> | <b>100.00</b> | <b>100.00</b> |

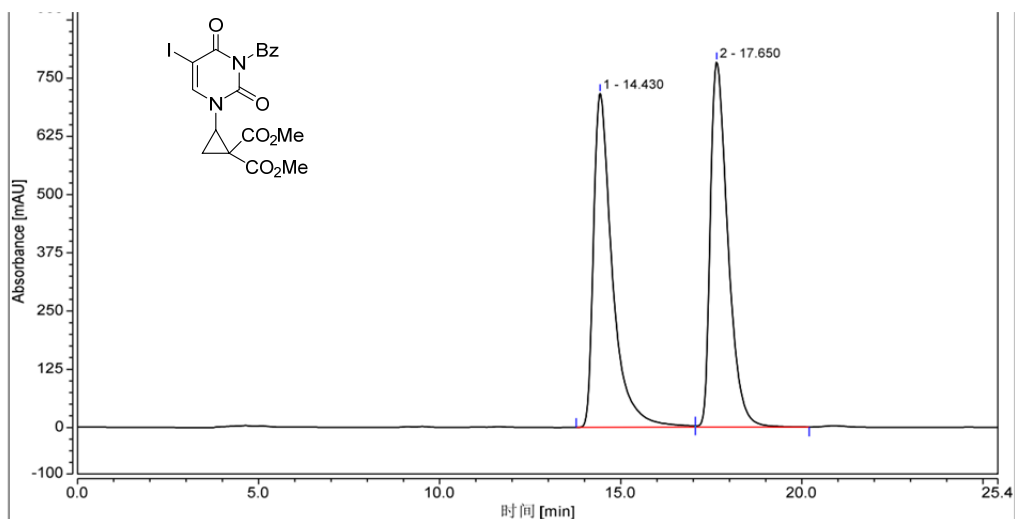

| Peak          | Retention Time<br>min | Area<br>mAU*min | Height<br>mAU   | Area<br>%     |
|---------------|-----------------------|-----------------|-----------------|---------------|
| 1             | 14.430                | 435.019         | 717.144         | 49.66         |
| 2             | 17.650                | 441.019         | 784.961         | 50.34         |
| <b>Total:</b> |                       | <b>876.037</b>  | <b>1502.105</b> | <b>100.00</b> |

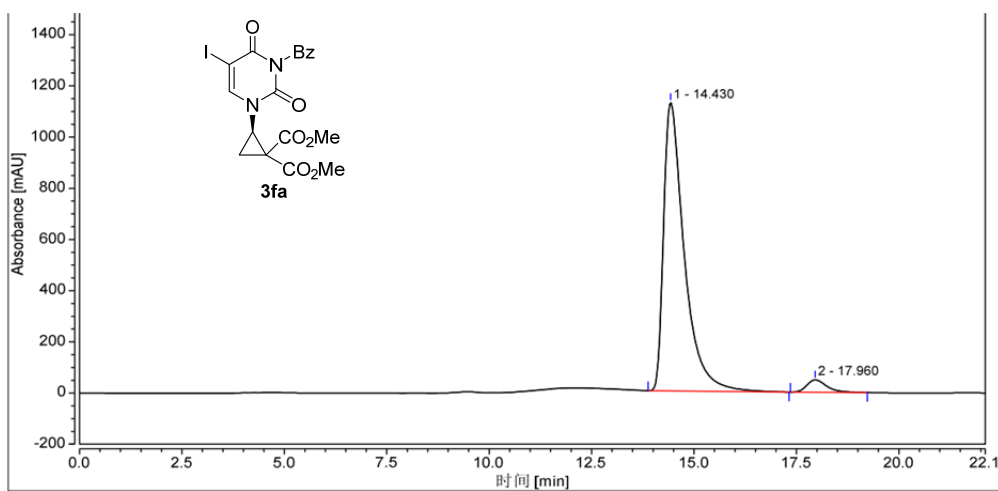

| Peak          | Retention Time<br>min | Area<br>mAU*min | Height<br>mAU   | Area<br>%     |
|---------------|-----------------------|-----------------|-----------------|---------------|
| 1             | 14.430                | 659.951         | 1126.831        | 96.02         |
| 2             | 17.960                | 27.350          | 48.497          | 3.98          |
| <b>Total:</b> |                       | <b>687.300</b>  | <b>1175.327</b> | <b>100.00</b> |

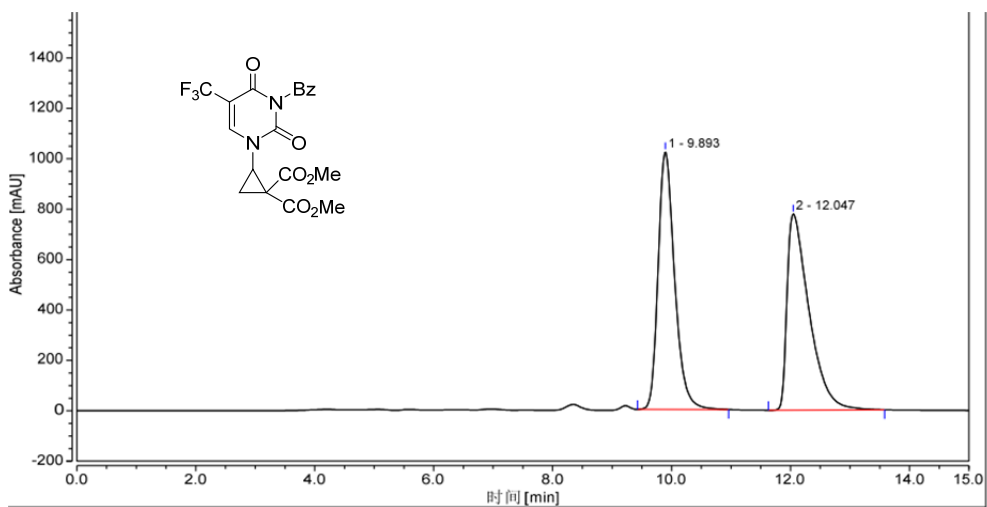

### 积分结果

| Peak          | Retention Time<br>min | Area<br>mAU*min | Height<br>mAU   | Area<br>%     | Height<br>%   |
|---------------|-----------------------|-----------------|-----------------|---------------|---------------|
| 1             | 9.893                 | 329.085         | 1024.217        | 49.66         | 56.80         |
| 2             | 12.047                | 333.599         | 779.099         | 50.34         | 43.20         |
| <b>Total:</b> |                       | <b>662.685</b>  | <b>1803.316</b> | <b>100.00</b> | <b>100.00</b> |

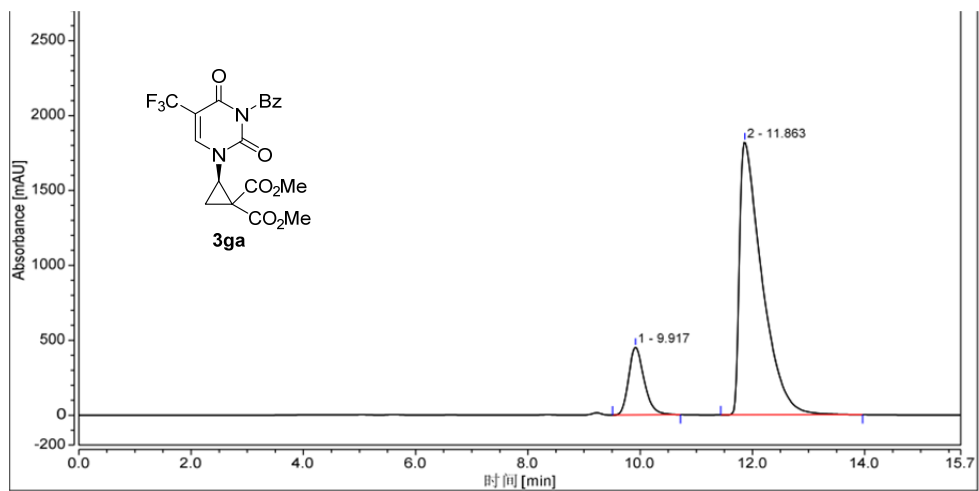

### 积分结果

| Peak          | Retention Time<br>min | Area<br>mAU*min | Height<br>mAU   | Area<br>%     | Height<br>%   |
|---------------|-----------------------|-----------------|-----------------|---------------|---------------|
| 1             | 9.917                 | 145.057         | 451.908         | 14.65         | 19.87         |
| 2             | 11.863                | 845.180         | 1822.261        | 85.35         | 80.13         |
| <b>Total:</b> |                       | <b>990.237</b>  | <b>2274.169</b> | <b>100.00</b> | <b>100.00</b> |

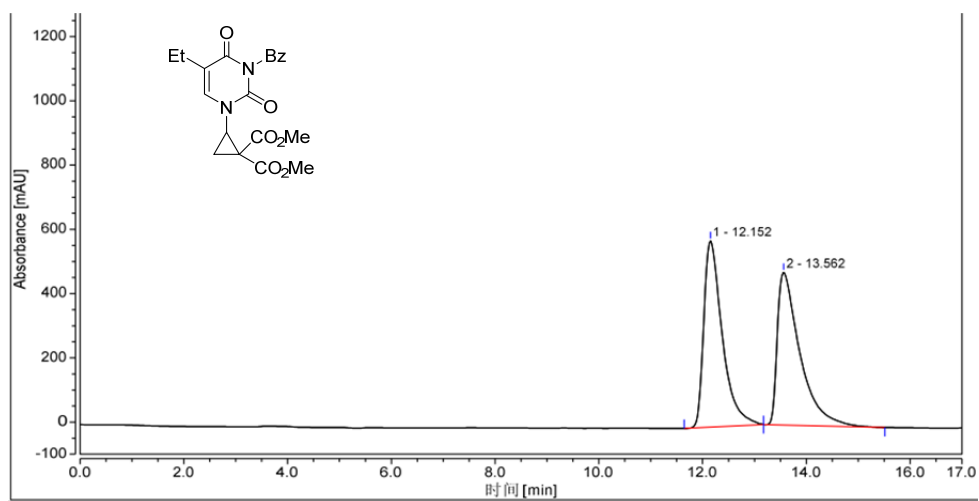

### 积分结果

| Peak          | Retention Time<br>min | Area<br>mAU*min | Height<br>mAU   | Area<br>%     | Height<br>%   |
|---------------|-----------------------|-----------------|-----------------|---------------|---------------|
| 1             | 12.152                | 239.021         | 579.975         | 49.96         | 54.94         |
| 2             | 13.562                | 239.415         | 475.738         | 50.04         | 45.06         |
| <b>Total:</b> |                       | <b>478.435</b>  | <b>1055.713</b> | <b>100.00</b> | <b>100.00</b> |

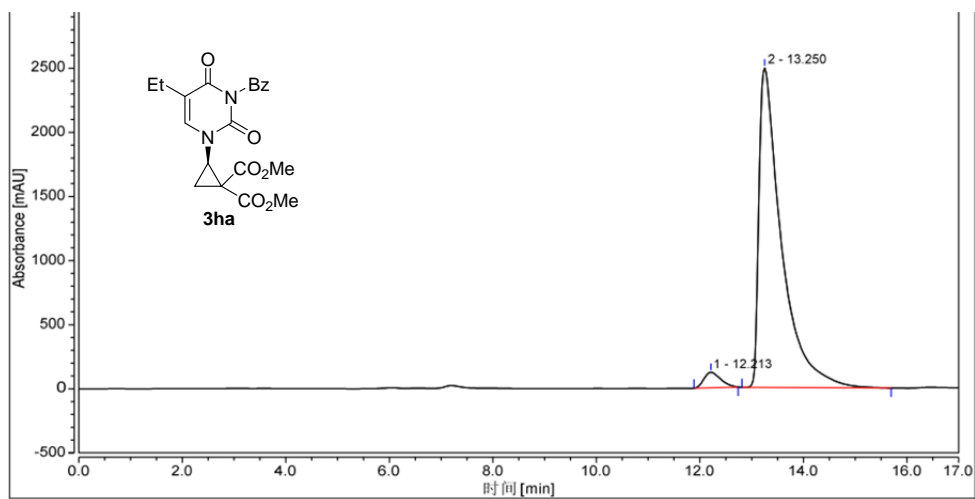

### 积分结果

| Peak          | Retention Time<br>min | Area<br>mAU*min | Height<br>mAU   | Area<br>%     | Height<br>%   |
|---------------|-----------------------|-----------------|-----------------|---------------|---------------|
| 1             | 12.213                | 45.109          | 120.646         | 3.47          | 4.62          |
| 2             | 13.250                | 1255.451        | 2491.625        | 96.53         | 95.38         |
| <b>Total:</b> |                       | <b>1300.561</b> | <b>2612.271</b> | <b>100.00</b> | <b>100.00</b> |



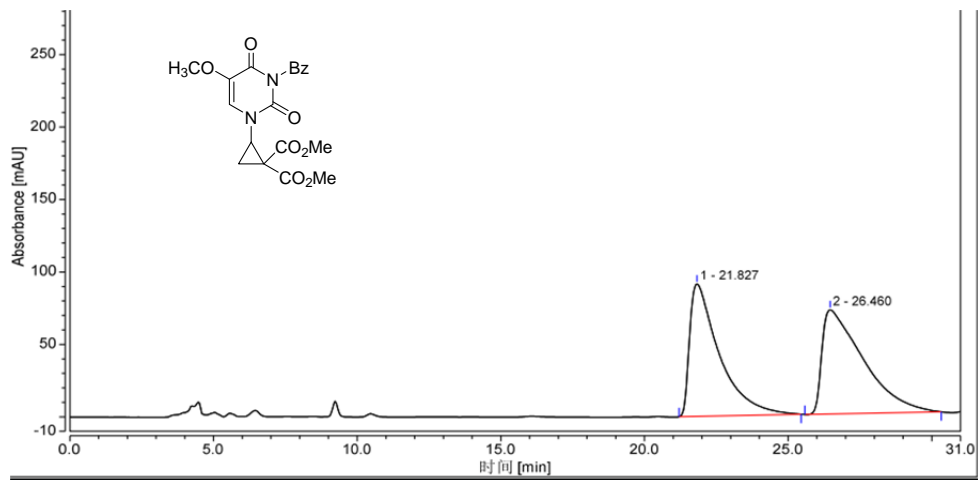

**积分结果**

| Peak          | Retention Time<br>min | Area<br>mAU*min | Height<br>mAU  | Area<br>%     | Height<br>%   |
|---------------|-----------------------|-----------------|----------------|---------------|---------------|
| 1             | 21.827                | 109.382         | 91.334         | 47.81         | 55.97         |
| 2             | 26.460                | 119.423         | 71.852         | 52.19         | 44.03         |
| <b>Total:</b> |                       | <b>228.805</b>  | <b>163.186</b> | <b>100.00</b> | <b>100.00</b> |

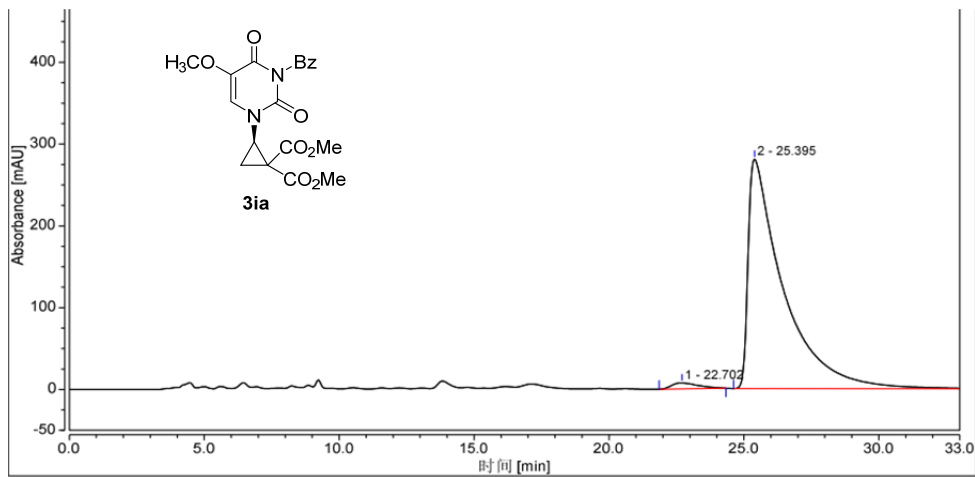

**积分结果**

| Peak          | Retention Time<br>min | Area<br>mAU*min | Height<br>mAU  | Area<br>%     | Height<br>%   |
|---------------|-----------------------|-----------------|----------------|---------------|---------------|
| 1             | 22.702                | 8.305           | 7.286          | 1.93          | 2.53          |
| 2             | 25.395                | 422.238         | 280.403        | 98.07         | 97.47         |
| <b>Total:</b> |                       | <b>430.543</b>  | <b>287.688</b> | <b>100.00</b> | <b>100.00</b> |

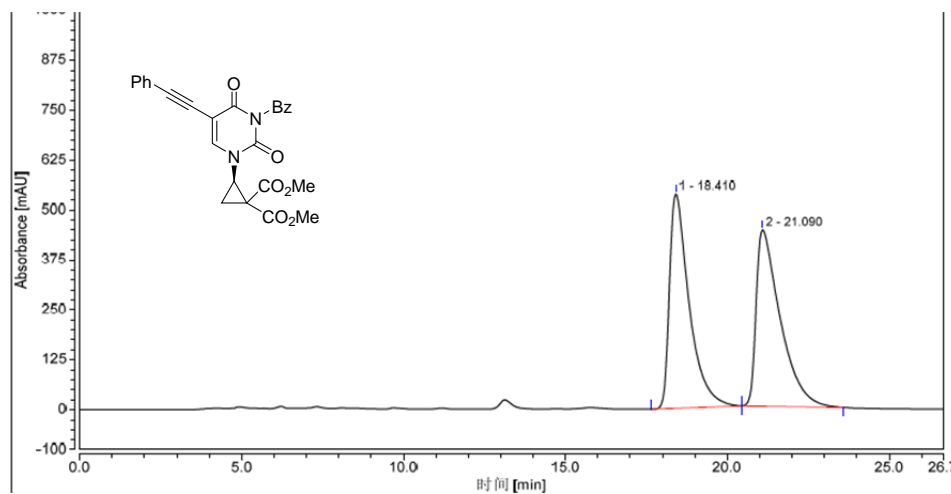

| Peak          | Retention Time<br>min | Area<br>mAU*min | Height<br>mAU  | Area<br>%     |
|---------------|-----------------------|-----------------|----------------|---------------|
| 1             | 18.410                | 378.335         | 536.992        | 49.89         |
| 2             | 21.090                | 379.987         | 441.841        | 50.11         |
| <b>Total:</b> |                       | <b>758.321</b>  | <b>978.832</b> | <b>100.00</b> |

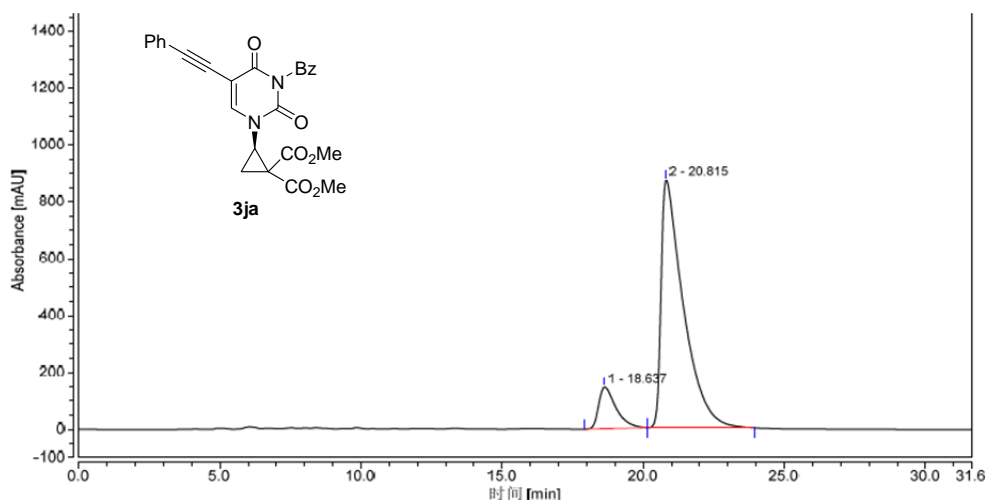

| Peak          | Retention Time<br>min | Area<br>mAU*min | Height<br>mAU   | Area<br>%     |
|---------------|-----------------------|-----------------|-----------------|---------------|
| 1             | 18.637                | 104.134         | 146.513         | 11.61         |
| 2             | 20.815                | 792.921         | 872.726         | 88.39         |
| <b>Total:</b> |                       | <b>897.055</b>  | <b>1019.239</b> | <b>100.00</b> |

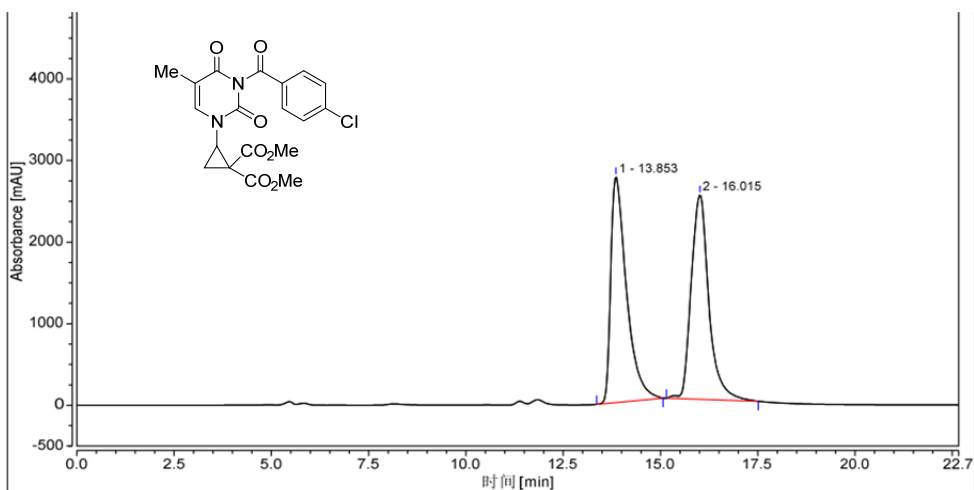

**积分结果**

| Peak          | Retention Time<br>min | Area<br>mAU*min | Height<br>mAU   | Area<br>%     | Height<br>%   |
|---------------|-----------------------|-----------------|-----------------|---------------|---------------|
| 1             | 13.853                | 1297.769        | 2771.681        | 49.66         | 52.50         |
| 2             | 16.015                | 1315.384        | 2507.870        | 50.34         | 47.50         |
| <b>Total:</b> |                       | <b>2613.153</b> | <b>5279.550</b> | <b>100.00</b> | <b>100.00</b> |

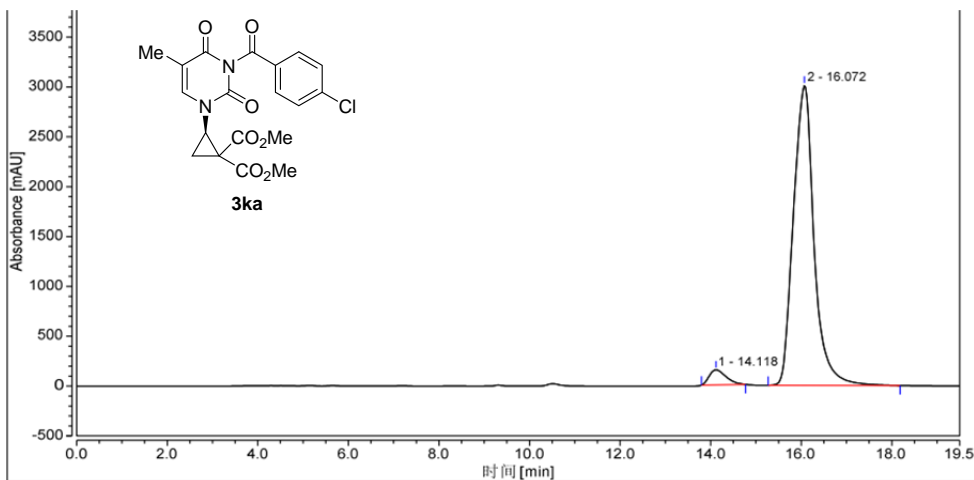

**积分结果**

| Peak          | Retention Time<br>min | Area<br>mAU*min | Height<br>mAU   | Area<br>%     | Height<br>%   |
|---------------|-----------------------|-----------------|-----------------|---------------|---------------|
| 1             | 14.118                | 64.861          | 151.202         | 3.93          | 4.78          |
| 2             | 16.072                | 1586.573        | 3010.611        | 96.07         | 95.22         |
| <b>Total:</b> |                       | <b>1651.433</b> | <b>3161.813</b> | <b>100.00</b> | <b>100.00</b> |

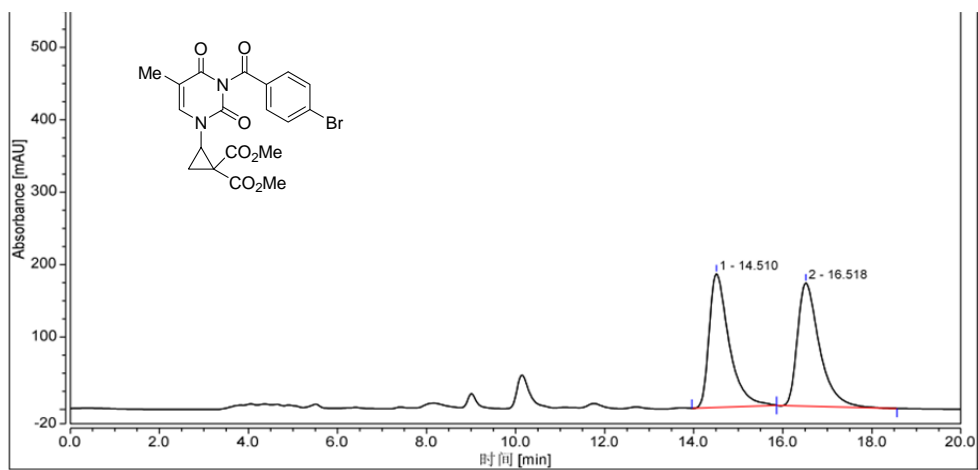

### 积分结果

| Peak          | Retention Time<br>min | Area<br>mAU*min | Height<br>mAU  | Area<br>%     | Height<br>%   |
|---------------|-----------------------|-----------------|----------------|---------------|---------------|
| 1             | 14.510                | 96.110          | 184.733        | 49.63         | 52.06         |
| 2             | 16.518                | 97.550          | 170.082        | 50.37         | 47.94         |
| <b>Total:</b> |                       | <b>193.660</b>  | <b>354.815</b> | <b>100.00</b> | <b>100.00</b> |

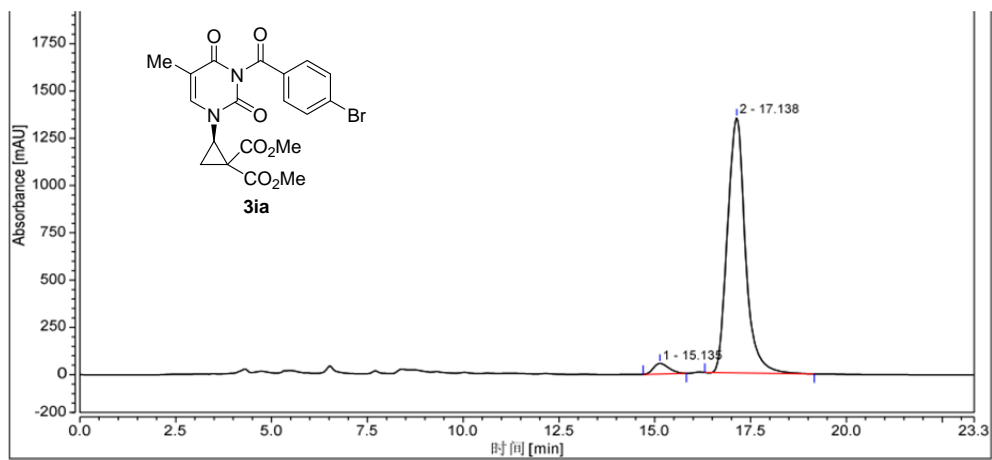

### 积分结果

| Peak          | Retention Time<br>min | Area<br>mAU*min | Height<br>mAU   | Area<br>%     | Height<br>%   |
|---------------|-----------------------|-----------------|-----------------|---------------|---------------|
| 1             | 15.135                | 26.219          | 55.898          | 3.48          | 3.98          |
| 2             | 17.138                | 727.370         | 1348.598        | 96.52         | 96.02         |
| <b>Total:</b> |                       | <b>753.589</b>  | <b>1404.496</b> | <b>100.00</b> | <b>100.00</b> |

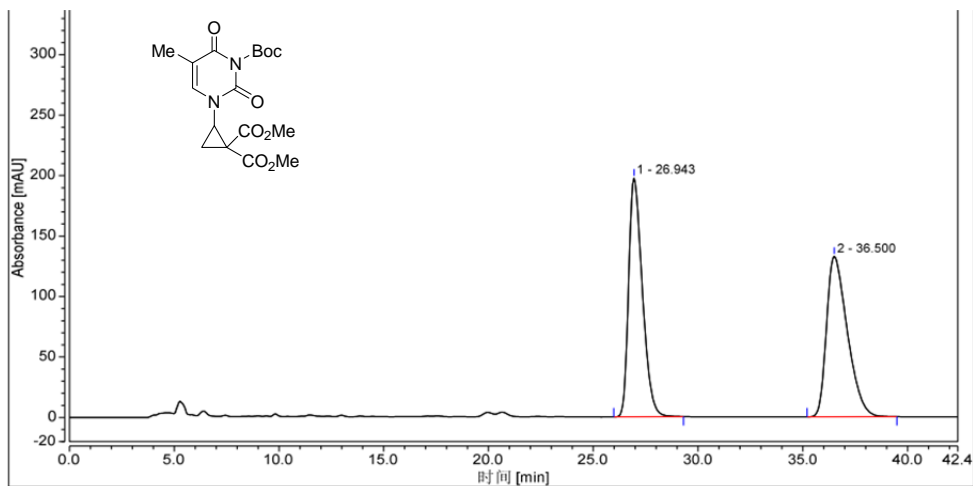

### 积分结果

| Peak          | Retention Time min | Area mAU*min   | Height mAU     | Area %        | Height %      |
|---------------|--------------------|----------------|----------------|---------------|---------------|
| 1             | 26.943             | 150.197        | 197.396        | 49.61         | 59.78         |
| 2             | 36.500             | 152.587        | 132.781        | 50.39         | 40.22         |
| <b>Total:</b> |                    | <b>302.784</b> | <b>330.177</b> | <b>100.00</b> | <b>100.00</b> |

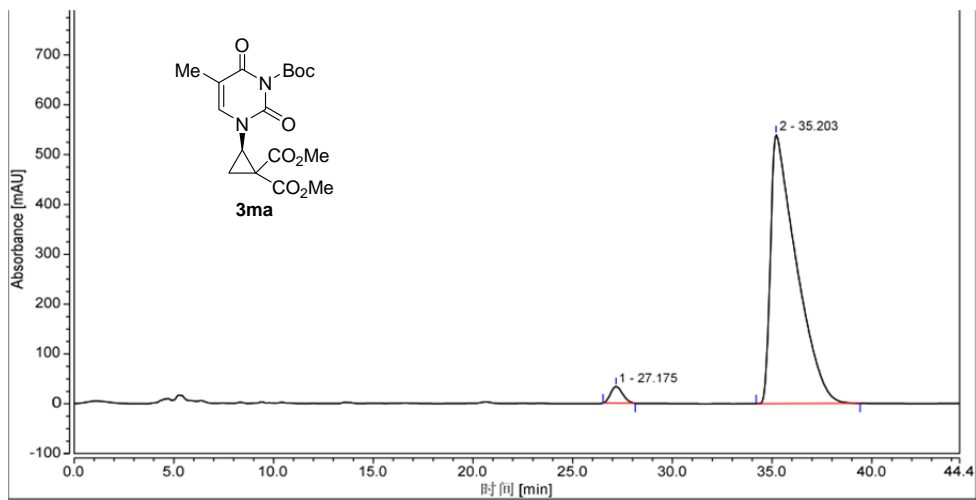

### 积分结果

| Peak          | Retention Time min | Area mAU*min   | Height mAU     | Area %        | Height %      |
|---------------|--------------------|----------------|----------------|---------------|---------------|
| 1             | 27.175             | 23.380         | 33.313         | 2.81          | 5.81          |
| 2             | 35.203             | 809.520        | 539.615        | 97.19         | 94.19         |
| <b>Total:</b> |                    | <b>832.900</b> | <b>572.928</b> | <b>100.00</b> | <b>100.00</b> |

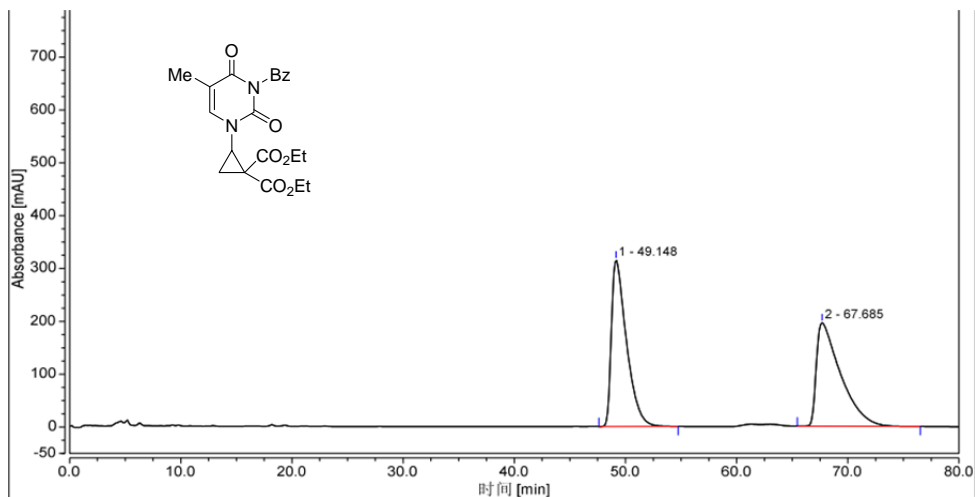

**积分结果**

| Peak          | Retention Time<br>min | Area<br>mAU*min | Height<br>mAU  | Area<br>%     | Height<br>%   |
|---------------|-----------------------|-----------------|----------------|---------------|---------------|
| 1             | 49.148                | 495.411         | 314.816        | 50.14         | 61.66         |
| 2             | 67.685                | 492.688         | 195.767        | 49.86         | 38.34         |
| <b>Total:</b> |                       | <b>988.099</b>  | <b>510.583</b> | <b>100.00</b> | <b>100.00</b> |

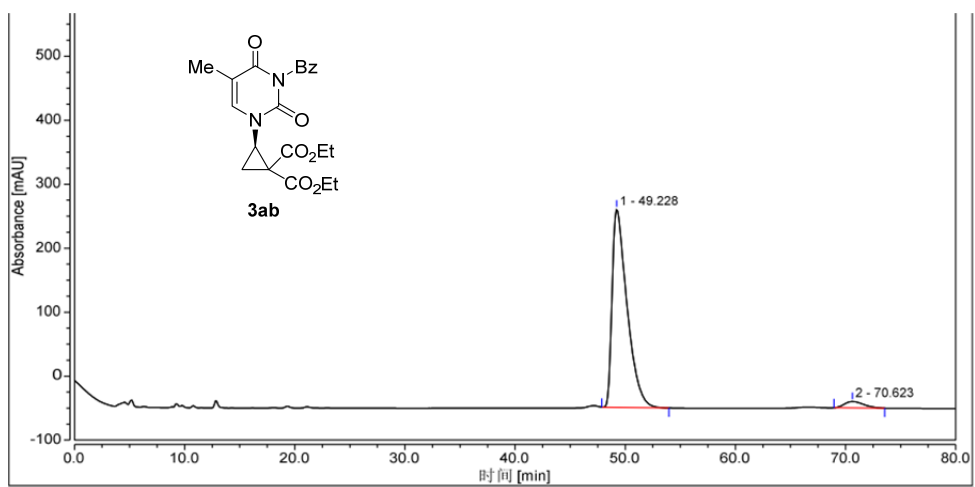

**积分结果**

| Peak          | Retention Time<br>min | Area<br>mAU*min | Height<br>mAU  | Area<br>%     | Height<br>%   |
|---------------|-----------------------|-----------------|----------------|---------------|---------------|
| 1             | 49.228                | 487.245         | 310.088        | 95.99         | 96.90         |
| 2             | 70.623                | 20.345          | 9.925          | 4.01          | 3.10          |
| <b>Total:</b> |                       | <b>507.590</b>  | <b>320.013</b> | <b>100.00</b> | <b>100.00</b> |

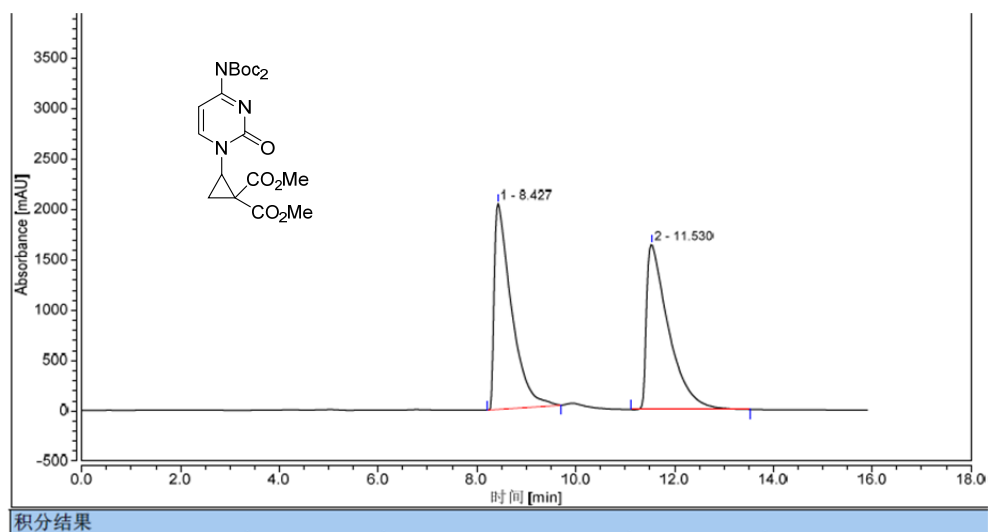

| Peak   | Retention Time<br>min | Area<br>mAU*min | Height<br>mAU | Area<br>% | Height<br>% |
|--------|-----------------------|-----------------|---------------|-----------|-------------|
| 1      | 8.427                 | 825.755         | 2046.410      | 49.36     | 55.49       |
| 2      | 11.530                | 847.337         | 1641.518      | 50.64     | 44.51       |
| Total: |                       | 1673.092        | 3687.928      | 100.00    | 100.00      |

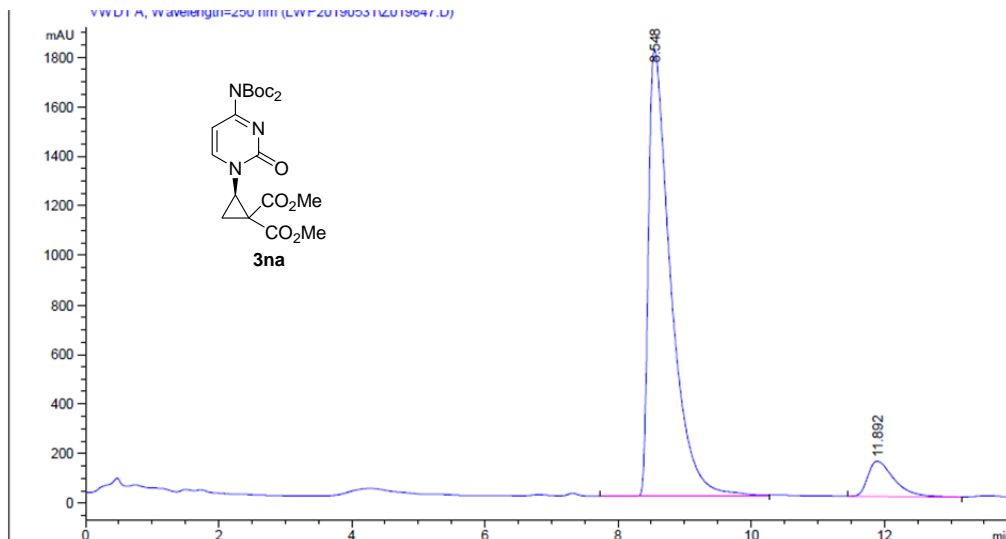

| Peak # | RetTime [min] | Type | Width [min] | Area [mAU*s] | Height [mAU] | Area %  |
|--------|---------------|------|-------------|--------------|--------------|---------|
| 1      | 8.548         | BV   | 0.3443      | 4.19123e4    | 1801.31018   | 91.5558 |
| 2      | 11.892        | BB   | 0.4137      | 3865.56201   | 141.97562    | 8.4442  |

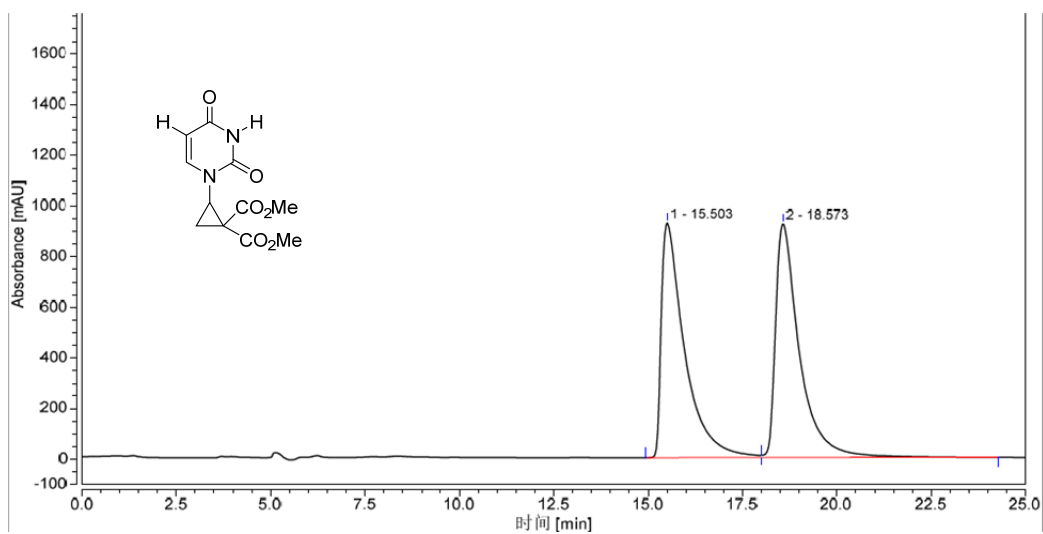

### 积分结果

| Peak          | Retention Time<br>min | Area<br>mAU*min | Height<br>mAU   | Area<br>%     | Height<br>%   |
|---------------|-----------------------|-----------------|-----------------|---------------|---------------|
| 1             | 15.503                | 659.219         | 927.243         | 49.42         | 50.10         |
| 2             | 18.573                | 674.726         | 923.509         | 50.58         | 49.90         |
| <b>Total:</b> |                       | <b>1333.945</b> | <b>1850.752</b> | <b>100.00</b> | <b>100.00</b> |

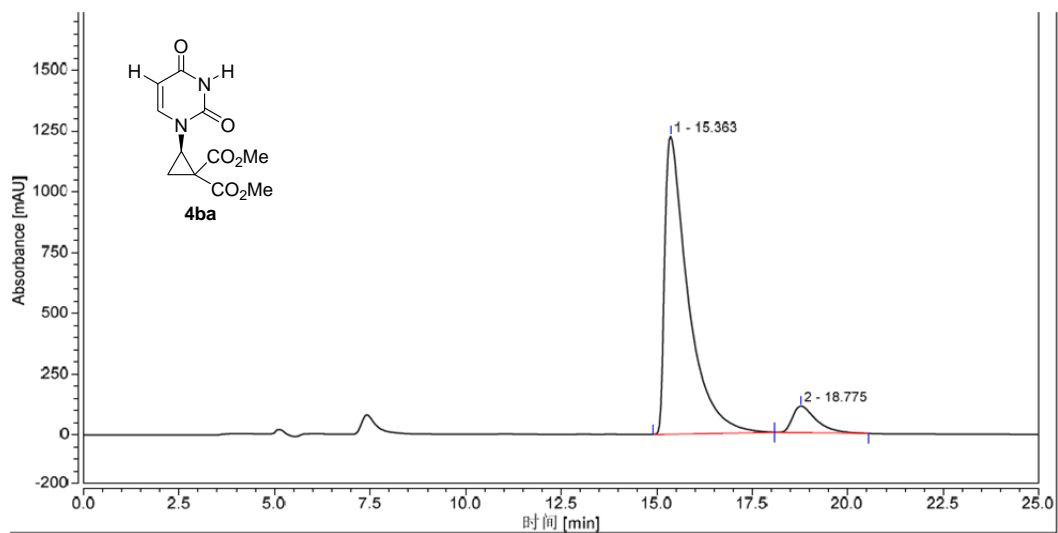

### 积分结果

| Peak          | Retention Time<br>min | Area<br>mAU*min | Height<br>mAU   | Area<br>%     | Height<br>%   |
|---------------|-----------------------|-----------------|-----------------|---------------|---------------|
| 1             | 15.363                | 865.488         | 1225.390        | 91.68         | 91.81         |
| 2             | 18.775                | 78.511          | 109.366         | 8.32          | 8.19          |
| <b>Total:</b> |                       | <b>943.998</b>  | <b>1334.756</b> | <b>100.00</b> | <b>100.00</b> |



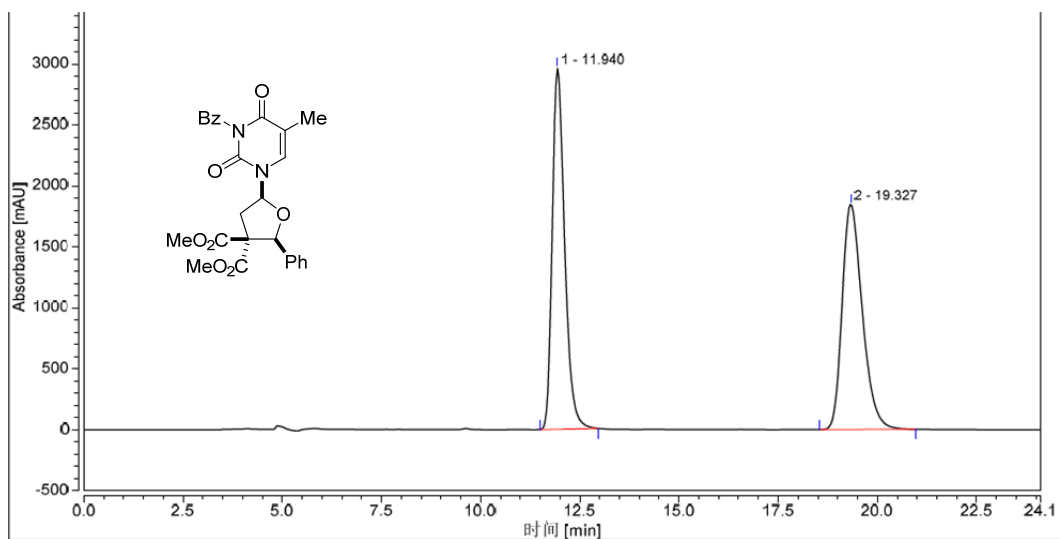

积分结果

| Peak          | Retention Time<br>min | Area<br>mAU*min | Height<br>mAU   | Area<br>%     | Height<br>%   |
|---------------|-----------------------|-----------------|-----------------|---------------|---------------|
| 1             | 11.940                | 1072.282        | 2961.281        | 49.61         | 61.57         |
| 2             | 19.327                | 1089.034        | 1848.484        | 50.39         | 38.43         |
| <b>Total:</b> |                       | <b>2161.316</b> | <b>4809.765</b> | <b>100.00</b> | <b>100.00</b> |

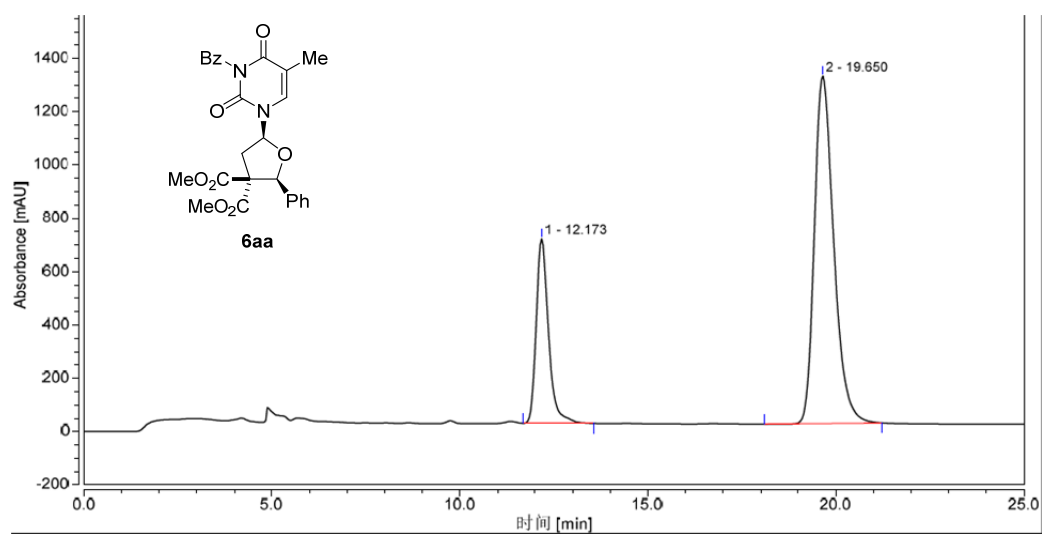

积分结果

| Peak          | Retention Time<br>min | Area<br>mAU*min | Height<br>mAU   | Area<br>%     | Height<br>%   |
|---------------|-----------------------|-----------------|-----------------|---------------|---------------|
| 1             | 12.173                | 262.802         | 692.747         | 25.24         | 34.68         |
| 2             | 19.650                | 778.402         | 1304.901        | 74.76         | 65.32         |
| <b>Total:</b> |                       | <b>1041.204</b> | <b>1997.648</b> | <b>100.00</b> | <b>100.00</b> |

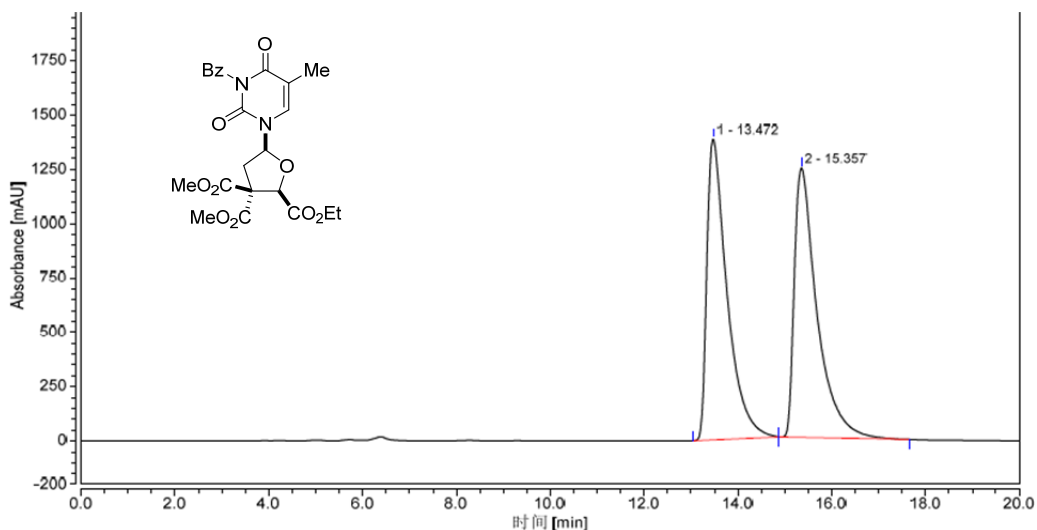

| Peak          | Retention Time<br>min | Area<br>mAU*min | Height<br>mAU   | Area<br>%     |
|---------------|-----------------------|-----------------|-----------------|---------------|
| 1             | 13.472                | 690.022         | 1387.484        | 49.90         |
| 2             | 15.357                | 692.867         | 1241.544        | 50.10         |
| <b>Total:</b> |                       | <b>1382.889</b> | <b>2629.028</b> | <b>100.00</b> |

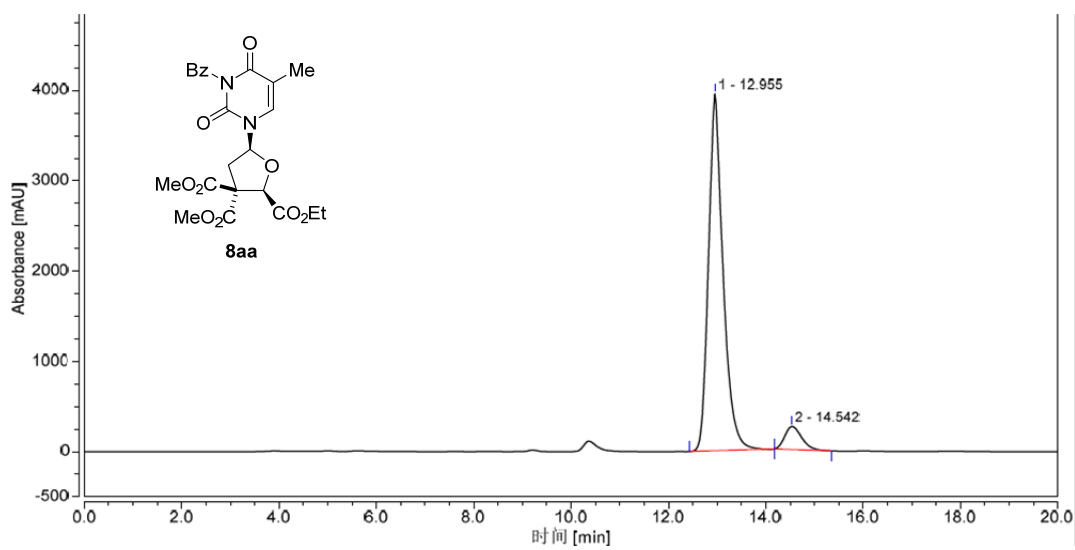

| 积分结果          |                       |                 |                 |               |               |
|---------------|-----------------------|-----------------|-----------------|---------------|---------------|
| Peak          | Retention Time<br>min | Area<br>mAU*min | Height<br>mAU   | Area<br>%     | Height<br>%   |
| 1             | 12.955                | 1364.342        | 3954.891        | 92.99         | 93.93         |
| 2             | 14.542                | 102.784         | 255.799         | 7.01          | 6.07          |
| <b>Total:</b> |                       | <b>1467.126</b> | <b>4210.690</b> | <b>100.00</b> | <b>100.00</b> |

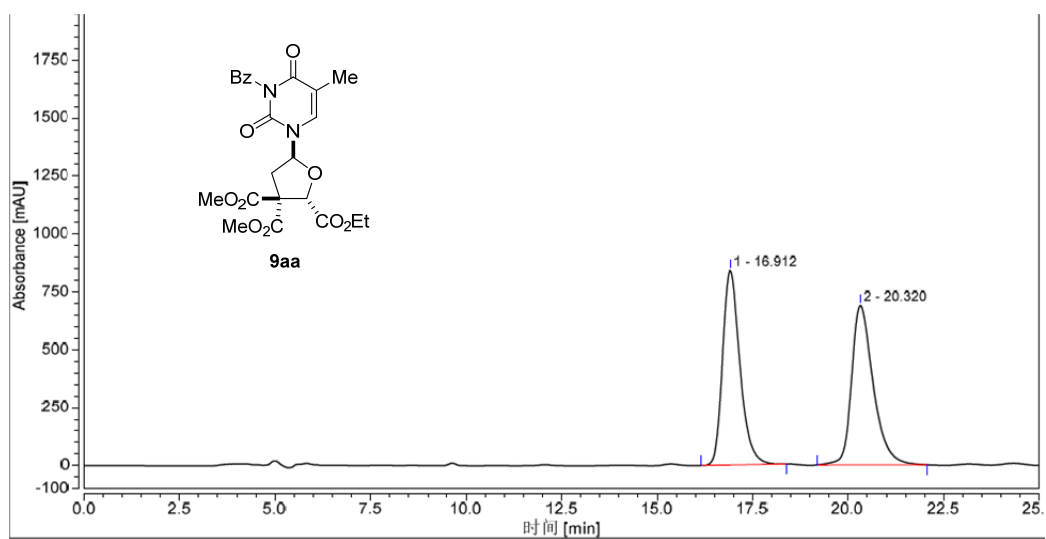

| 积分结果          |                    |                |                 |               |               |
|---------------|--------------------|----------------|-----------------|---------------|---------------|
| Peak          | Retention Time min | Area mAU*min   | Height mAU      | Area %        | Height %      |
| 1             | 16.912             | 441.432        | 840.775         | 49.41         | 54.95         |
| 2             | 20.320             | 452.041        | 689.362         | 50.59         | 45.05         |
| <b>Total:</b> |                    | <b>893.472</b> | <b>1530.137</b> | <b>100.00</b> | <b>100.00</b> |

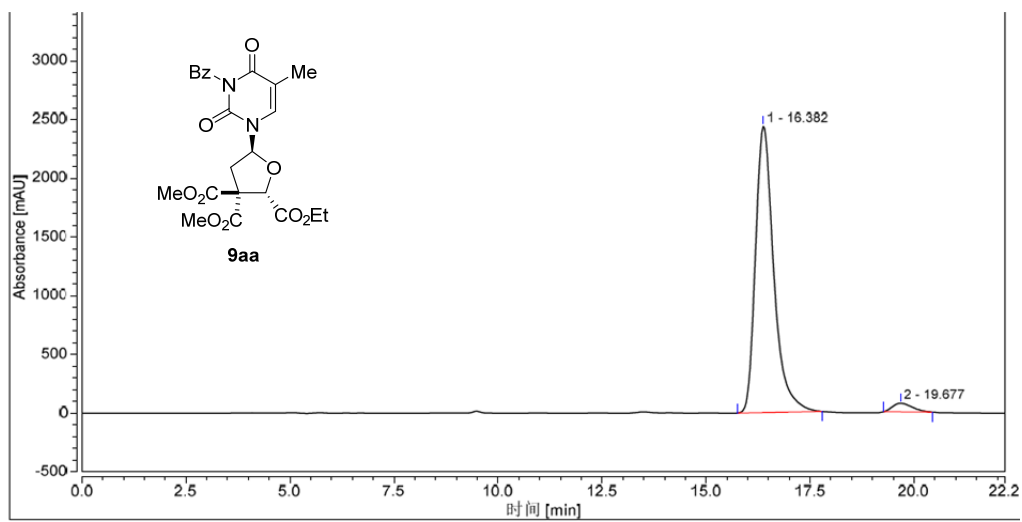

| 积分结果          |                    |                 |                 |               |               |
|---------------|--------------------|-----------------|-----------------|---------------|---------------|
| Peak          | Retention Time min | Area mAU*min    | Height mAU      | Area %        | Height %      |
| 1             | 16.382             | 1241.759        | 2439.181        | 96.82         | 97.05         |
| 2             | 19.677             | 40.766          | 74.150          | 3.18          | 2.95          |
| <b>Total:</b> |                    | <b>1282.524</b> | <b>2513.331</b> | <b>100.00</b> | <b>100.00</b> |

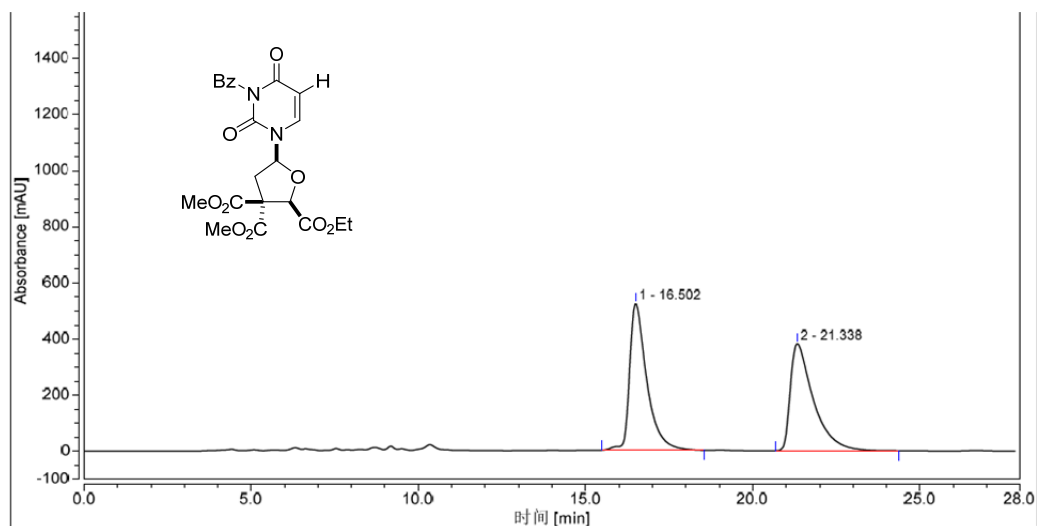

| 积分结果          |                       |                 |                |               |               |
|---------------|-----------------------|-----------------|----------------|---------------|---------------|
| Peak          | Retention Time<br>min | Area<br>mAU*min | Height<br>mAU  | Area<br>%     | Height<br>%   |
| 1             | 16.502                | 312.294         | 523.870        | 50.56         | 57.82         |
| 2             | 21.338                | 305.379         | 382.208        | 49.44         | 42.18         |
| <b>Total:</b> |                       | <b>617.673</b>  | <b>906.078</b> | <b>100.00</b> | <b>100.00</b> |

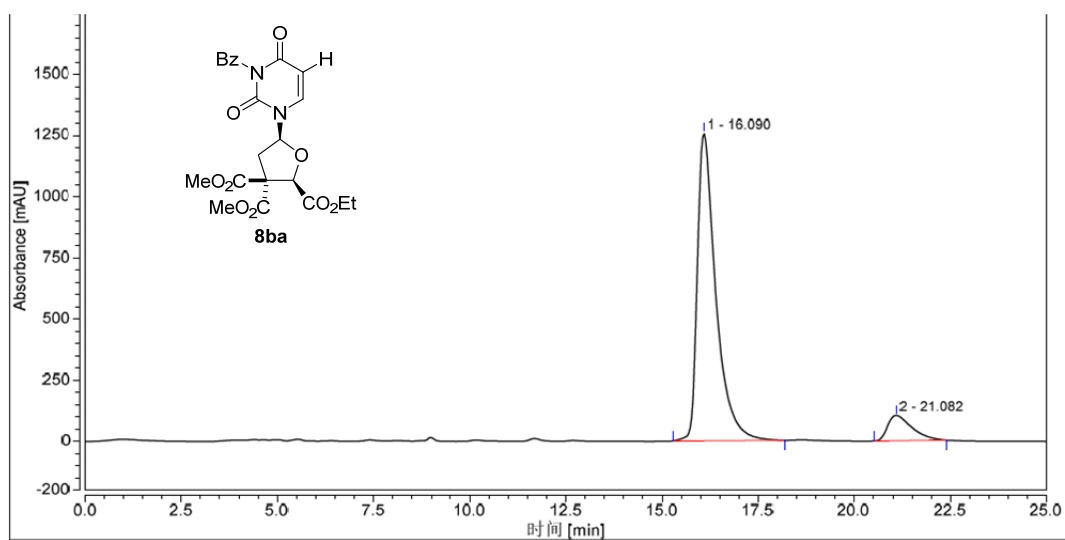

| 积分结果          |                       |                 |                 |               |               |
|---------------|-----------------------|-----------------|-----------------|---------------|---------------|
| Peak          | Retention Time<br>min | Area<br>mAU*min | Height<br>mAU   | Area<br>%     | Height<br>%   |
| 1             | 16.090                | 699.178         | 1256.002        | 90.27         | 92.39         |
| 2             | 21.082                | 75.405          | 103.460         | 9.73          | 7.61          |
| <b>Total:</b> |                       | <b>774.582</b>  | <b>1359.463</b> | <b>100.00</b> | <b>100.00</b> |

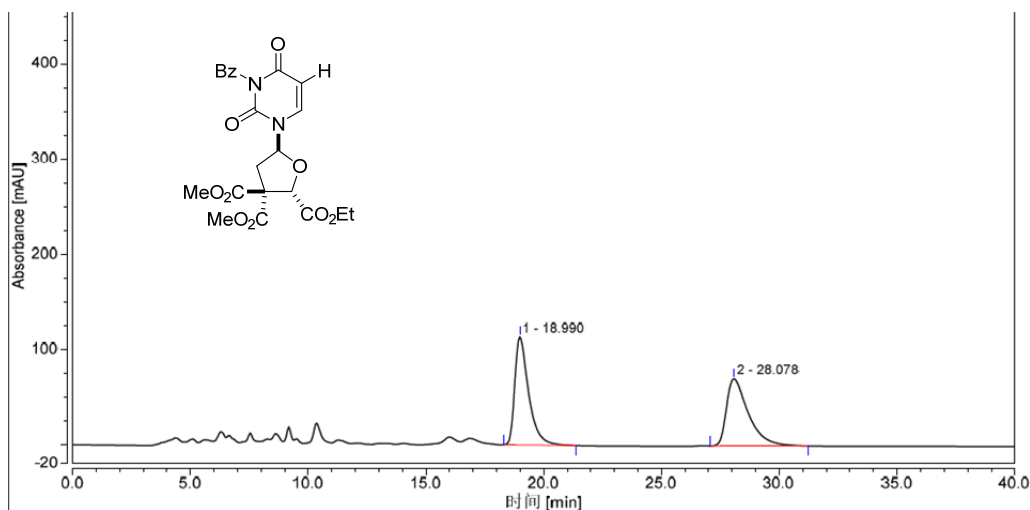

| 积分结果          |                    |                |                |               |               |
|---------------|--------------------|----------------|----------------|---------------|---------------|
| Peak          | Retention Time min | Area mAU*min   | Height mAU     | Area %        | Height %      |
| 1             | 18.990             | 77.582         | 113.739        | 50.71         | 61.71         |
| 2             | 28.078             | 75.402         | 70.582         | 49.29         | 38.29         |
| <b>Total:</b> |                    | <b>152.984</b> | <b>184.321</b> | <b>100.00</b> | <b>100.00</b> |

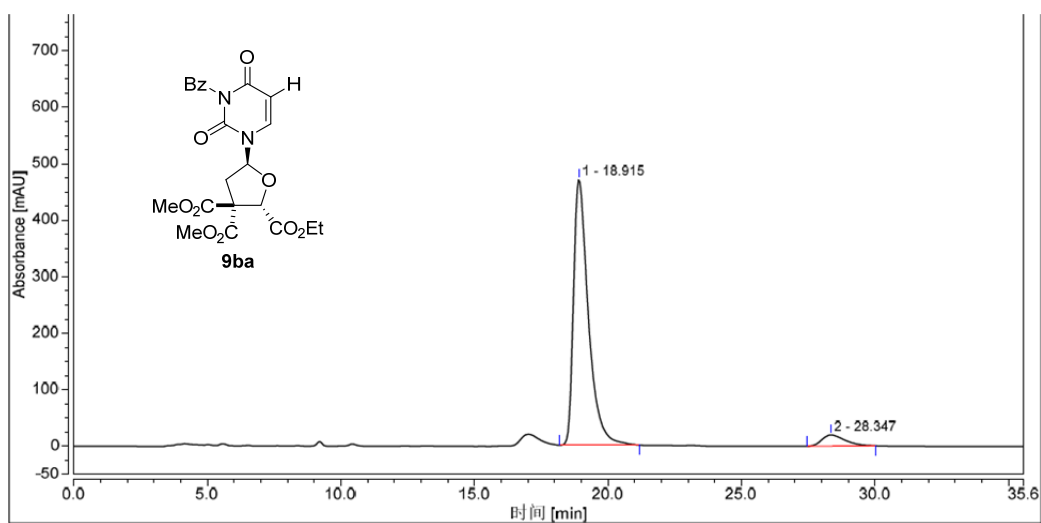

| 积分结果          |                    |                |                |               |               |
|---------------|--------------------|----------------|----------------|---------------|---------------|
| Peak          | Retention Time min | Area mAU*min   | Height mAU     | Area %        | Height %      |
| 1             | 18.915             | 302.101        | 470.823        | 93.85         | 95.99         |
| 2             | 28.347             | 19.790         | 19.689         | 6.15          | 4.01          |
| <b>Total:</b> |                    | <b>321.892</b> | <b>490.513</b> | <b>100.00</b> | <b>100.00</b> |
